# Supplementary material for: Clinicopathologic characteristics, laboratory parameters, treatment protocols, and outcomes of pancreatic cancer: a retrospective cohort study of 1433 patients in China
Source: PeerJ. 2018 May 28;6:e4893. doi: 10.7717/peerj.4893 (PMC5978392; doi:10.7717/peerj.4893)
Supplement: Supplemental Information 1 — Raw data exported from the medical records of each patient in the whole cohort. [file peerj-06-4893-s001.xlsx]

## Sheet: 分析
no_id	group4	group2	bas_gender	bas_age	bas_age2	bas_diagtime	bas_depart4	bas_depart2	bas_place7	bas_place2	bas_race5	bas_race2	bas_pay3	bas_pay2	bas_job4	bas_job2	bas_mar	symp_no	symp_pain	symp_jaundice	symp_gas	symp_wloss	symp_wlosskg	dis_dm	dis_hp	dis_chol	his_tumor	his_pc	life_smoke	life_drink	life_bmi	life_bmi2	t_b_rc	t_b_rc2	t_b_hb	t_b_hb2	t_b_wc	t_b_wc2	t_b_nc	t_b_nc2	t_b_lc	t_b_lc2	t_b_pl	t_b_pl2	t_bc_alt	t_bc_alt2	t_bc_ast	t_bc_ast2	t_bc_tbil
1	4	0	1	71	1	1	0	0	0	0	0	0	1	1	0	1	0	0	1	0	1	1	5	1	0	0	0	0	1	1	24.2	1	4.12	0	114	1	8.22	0	5.04	0	2.4	0	176	0	15	0	20	0	10.5
2	3	0	1	69	1	1	0	0	0	0	0	0	1	1	0	1	0	0	1	0	0	0	0	1	1	0	1	0	0	0	25.4	1	4.16	0	122	0	5.07	0	3.22	0	1.38	0	88	0	57	1	43	1	17.6
3	4	0	0	49	0	1	2	1	0	0	0	0	1	1	2	1	1	0	1	0	1	1	3	0	0	0	0	0	1	1	17.2	0	3.56	0	107	1	4.77	0	2.31	0	1.68	0	95	0	6	0	14	0	9.3
4	4		0	52	0	1	1	1	2	1	0	0	1	1	3	1	0	0	1	0	0	1	2	0	0	0	1	1	1	1	20.4	0	4.32	0	137	0	5.46	0	3.29	0	1.49	0	235	0	17	0	18	0	10.3
5	2	0	1	69	1	1	0	0	6	1	0	0	1	1	3	1	0	0	1	0	0	1	3	0	0	0	0	0	0	0	24.6	1	4.63	0	110	1	6.79	0	5.33	0	0.98	0	324	1	36	0	40	0	8.4
6	3		1	45	0	1	1	1	6	1	1	1	0	0	3	1	0	0	1	0	0	0	0	0	0	0	0	0	0	0	22.7	0	4.51	0	116	1	8.09	0	6.76	0	0.85	0	167	0	8	0	38	0	4.4
7	3		1	55	0	1	0	0	0	0	0	0	1	1	0	1	0	0	1	0	0	0	0	0	0	0	0	0	0	0	27.3	1	3.73	0	94	1	5.8	0	3.88	0	1.18	0	212	0	25	0	20	0	12.5
8	4	0	1	44	0	1	2	1	1	1	1	1	1	1	2	1	0	0	0	0	0	1	10	1	0	0	0	0	0	0	21.4	0	3.7	0	110	1	10.06	1	8.04	1	1.15	0	198	0	193	1	98	1	26.4
9	1		1	59	0	1	3	1	0	0	0	0	1	1	0	1	0	1	0	0	0	0	0	0	0	0	1	0	0	0	20	0	4.04	0	129	0	5.34	0	3.02	0	1.93	0	241	0	36	0	24	0	23.8
10	2		0	74	1	1	0	0	1	1	0	0	1	1	0	1	0	0	1	0	1	1	10	0	0	1	0	0	0	0	20.8	0	4	0	127	0	5.27	0	2.68	0	1.81	0	258	0	118	1	94	1	8.8
11	2	0	0	52	0	1	3	1	0	0	0	0	1	1	2	1	0	0	1	0	0	1	15	0	1	0	0	0	1	1	23.9	0	4.55	0	159	0	4.75	0	3.27	0	1.23	0	176	0
12	4	0	0	60	0	1	1	1	2	1	0	0	1	1	3	1	0	0	1	0	0	0	0	0	0	0	0	0			26	1	4.33	0	127	0	7.13	0	4.44	0	2.01	0	170	0	34	0	20	0	15.1
13	2		0	65	1	1	0	0	6	1	0	0	1	1	3	1	0	0	0	1	0	0	0	1	0	0	0	0	0	0	21.1	0	3.53	0	113	1	7.86	0	4.76	0	1.93	0	247	0	77	1	30	0	262.4
14	3		1	51	0	1	0	0	0	0	0	0	1	1	2	1	0	0	1	0	0	1	20	1	0	0	0	0	0	0	18.4	0	4.8	0	148	0	9.64	0	7.92	1	0.9	0	283	0	12	0	13	0	11.1
15	4	0	0	75	1	1	0	0	2	1	0	0	1	1	0	1	0	0	1	1	0	1	10	0	1	1	0	0	0	0	29.7	1	4.01	0	135	0	6.23	0	4.48	0	1.08	0	203	0	112	1	64	1	240.1
16	4		0	56	0	1	2	1	2	1	0	0	1	1	3	1	0	0	0	0	0	1	4	0	0	0	0	0	1	1	17.2	0	4.26	0	134	0	4.75	0	3.2	0	0.98	0	198	0	37	0	80	1	7.9
17	3	0	0	64	0	1	2	1	0	0	0	0	2		3	1	0	0	0	0	1	0	0	1	1	0	0	0	1	1	20.6	0	4.24	0	131	0	2.94	0	1.63	0	0.83	0	95	0	8	0	13	0	17.1
18	3	0	0	75	1	1	3	1	2	1	0	0	1	1	2	1	0	0	1	0	1	1	15	1	0	0	0	0	0	0	20.3	0	3.55	0	109	1	7.01	0	4.89	0	1.42	0	273	0	9	0	9	0	18.9
19	3	0	1	45	0	1	1	1	0	0	3	1	1	1	3	1	1	0	1	1	0	0	0	0	0	0	0	0	0	0	18.2	0	3.8	0	119	1	5.39	0	3.26	0	1.48	0	302	1	10	0	10	0	4.4
20	3	0	0	61	0	1	0	0	0	0	0	0	1	1	0	1	0	0	1	0	1	1	5	1	0	0	1	0	0	1	24.8	1	4.35	0	136	0	6.46	0	4.18	0	1.53	0	172	0	17	0	13	0	15
21	2		0	61	0	1	0	0	0	0	1	1	1	1	3	1	0	1	0	0	0	0	0	1	0	1	0	0	0	1	23.1	0	5.58	0	167	0	6.63	0			1.7	0	257	0	14	0	14	0	9.9
22	4		1	56	0	1	1	1	0	0	0	0	1	1	3	1	0	0	1	0	1	1	7	0	0	0	1	0	0	0	18.2	0	4.23	0	128	0	5.54	0	4.28	0	1.06	0	198	0	9	0	15	0	13
23	1	0	0	59	0	1	0	0	6	1	1	1	1	1	3	1	0	0	1	1	0	1	5	1	1	0	0	0	0	0	31.9	1	5.18	0	147	0	5.11	0	3.59	0	0.81	0	340	1	50	1	35	0	47.6
24	2		0	55	0	1	0	0	0	0	0	0	1	1	3	1	0	0	0	1	0	0	0	1	0	0	0	0	0	1	20.7	0	4.21	0	127	0	4.82	0	3.41	0	0.83	0	162	0	76	1	74	1	331.2
25	2	0	1	69	1	1	2	1	0	0	0	0	1	1	2	1	0	0	0	1	0	1		0	1	0	0	0	0	0	25.9	1	3.71	0	114	1	5.63	0	3.08	0	1.73	0	287	0	47	1	23	0	10.3
26	4		1	72	1	1	1	1	0	0	0	0	1	1	3	1	0	0	1	0	0	0	0	0	0	1	0	0	0	0	18.5	0	3.35	1	119	1	6.19	0	3.79	0	2	0	112	0	18	0	15	0	17.5
27	2		1	69	1	1	0	0	0	0	0	0	1	1	3	1	0	0	0	0	0	1	5	1	1	0	1	1	0	0	25	1	4.73	0			4.2	0	2.83	0	1.37	0	226	0	10	0	8	0	6.3
28	3	0	0	59	0	1	2	1	0	0	0	0	1	1	3	1	0	0	1	0	1	1	8	0	0	0	0	0	1	1	22.1	0	5.21	0	159	0	6.97	0	4.48	0	1.67	0	207	0	14	0	14	0	25.4
29	4	0	1	51	0	1	0	0	0	0	0	0	1	1	3	1	0	1	0	0	0	0	0	0	0	0	0	0	0	0	20.7	0	3.76	0	111	1	7	0	4.57	0	1.19	0	209	0	37	0	45	1	5.4
30	1		1	70	1	1	0	0	6	1	0	0	1	1	0	1	0	1	0	0	0	0	0	0	1	0	1	1	0	0	23.5	0	4.48	0	135	0	8.48	0	4.06	0	3.79	0	269	0	15	0	18	0	17.6
31	4	0	0	74	1	1	2	1	0	0	0	0	1	1	3	1	0	0	1	0	0	0	0	0	1	0	0	0	1	1	22.9	0	5.09	0	142	0	7.08	0	4.83	0	1.47	0	300	0	28	0	28	0	7.9
32	4		0	62	0	1	1	1	0	0	0	0	1	1	0	1	0	0	0	0	1	0	0	1	1	0	0	0	0	1	26	1	5.23	0	158	0	5.94	0	3.87	0	1.51	0	95	0	21	0	18	0	6
33	4	0	0	76	1	1	2	1	0	0	0	0	1	1	2	1	0	0	1	0	1	1	5	0	0	0	0	0	0	1	22.1	0	4.78	0	137	0	7.88	0	5.68	0	1.53	0	327	1	12	0	24	0	8.9
34	3		1	64	0	1	3	1	0	0	0	0	1	1	3	1	0	0	1	0	1	0	0	1	1	0	0	0	0	0	20.6	0	3.98	0	116	1	6.94	0	3.88	0	2.41	0	288	0	15	0	11	0	8.7
35	3	0	1	55	0	1	1	1	6	1	0	0	1	1	3	1	0	0	0	1	0	0	0	0	0	0	0	0	0	0	22.9	0	3.75	0	113	1	8.25	0	6.44	0	0.6	0	367	1	137	1	80	1	153.9
36	1	0	0	48	0	1	0	0	0	0	0	0	1	1	3	1	0	0	0	1	0	0	0	0	0	0	1	0	0	0	24.4	1	4.93	0	160	0	4.12	0	2.21	0	1.48	0	177	0	275	1	97	1	277.4
37	3	0	0	57	0	1	0	0	0	0	0	0	1	1	3	1	0	0	1	1	1	0	0	0	0	0	0	0	1	0	17.4	0	4.15	0	129	0	6.111	0	5.08	0	0.64	0	196	0	10	0	10	0	14.8
38	4	0	0	66	1	1	0	0	6	1	0	0	1	1	3	1	0	0	1	1	1	0	0	0	0	0	0	0	0	0	21.2	0	3.9	0	115	1	8.51	0	6.08	0	1.08	0	103	0	141	1	97	1	200.8
39	2	0	0	56	0	1	0	0	0	0	0	0	1	1	3	1	0	0	1	0	1	0	0	1	0	0	1	1	1	1	25.8	1	4.2	0	129	0	5.28	0	2.03	0	2.65	0	287	0	18	0	18	0	8.3
40	3	0	0	56	0	1	0	0	5	1	0	0	1	1	3	1	1	1	0	0	0	0	0	1	1	0	0	0	1	1	24.6	1	4.97	0	153	0	4.3	0	2.3	0	1.44	0	208	0	444	1	77	1	17.4
41	1		0	58	0	1	1	1	6	1	0	0	1	1	2	1	0	0	1	0	1	0	0	1	0	0	0	0	1	1	27.8	1	4.95	0	144	0	5.63	0	3.28	0	1.87	0	212	0	21	0	52	1	23.61
42	2		0	61	0	1	0	0	2	1	0	0	1	1	3	1	0	0	1	0	0	0	0	1	0	0	0	0	1	1	27	1	4.41	0	140	0	9.17	0	7.02	0	0.99	0	204	0	41	1	42	1	4.6
43	3	0	1	62	0	1	0	0	2	1	0	0	1	1	3	1	0	0	1	1	1	1	2	0	0	0	0	0	0	0	23.2	0	3.96	0	124	0	7.17	0	5.17	0	1.21	0	301	1	301	1	280	1	39.7
44	2	0	0	58	0	1	1	1	6	1	1	1	1	1	0	1	0	0	1	1	0	0	0	0	1	0	0	0	1	1	23.7	0													20	0	23	0	22.1
45	4	0	1	57	0	1	1	1	0	0	0	0	1	1	0	1	0	0	1	0	1	1	5	0	0	0	0	0	0	0	22.6	0	3.07	1	91	1	9.19	0	7.13	0	1.36	0	250	0	31	0	30	0	5.4
46	4	0	0	65	1	1	0	0	0	0	0	0	2		0	1	0	0	1	1	0	1	20	0	0	0	0	0	0	0	23	0	4.08	0	127	0	7.44	0	5.04	0	1.51	0	253	0	15	0	15	0	11.5
47	3		0	55	0	1	0	0	6	1	0	0	1	1	3	1	0	0	1	1	0	0	0	0	0	0	1	0	0	0	26.5	1	3.92	0	129	0	5.05	0	2.73	0	1.73	0	264	0	276	1	219	1	81.2
48	2	0	1	59	0	1	0	0	0	0	0	0	1	1	0	1	0	1	0	0	0	0	0	0	0	0	0	0	0	0	26.3	1	4.04	0	131	0	6.34	0	3.95	0	2.03	0	313	1	17	0	18	0	11
49	4	0	1	74	1	1	0	0	2	1	0	0	1	1	0	1	0	0	1	0	1	0	0	0	0	0	0	0	1	1	25.9	1	3.88	0	129	0	5.41	0	3.08	0	1.67	0	216	0	13	0	14	0	11
50	4	0	1	60	0	1	1	1	0	0	0	0	1	1	3	1	0	0	1	1	0	0	0	0	0	0	0	0	0	0	25	1	4.11	0	118	1	7.76	0	6.25	0	0.68	0	241	0	328	1	271	1	351.5
51	4	0	1	52	0	1	0	0	6	1	0	0	1	1	3	1	0	0	1	0	0	1	5	0	0	0	0	0	1	1	22.8	0	4.24	0	139	0	6.91	0	4.5	0	1.87	0	178	0	15	0	24	0	17
52	4	0	0	52	0	1	0	0	2	1	0	0	1	1	3	1	0	0	1	0	1	1	2.5	1	0	0	1	0	0	0	26.4	1	4.72	0	139	0	7.32	0	5.18	0	1.82	0	210	0	16	0	29	0	6
53	4	0	0	64	0	1	0	0	1	1	0	0	1	1	3	1	0	0	0	0	0	1	5	0	1	1	0	0	0	0	22	0	5.07	0	161	0	5.72	0	3.88	0	1.24	0	118	0	17	0	22	0	12.2
54	4	0	0	65	1	1	0	0	0	0	0	0	0	0	2	1	0	0	1	0	0	1	5	0	0	0	0	0	1	1	22.8	0	4.51	0	130	0	7.69	0	5.7	0	1.41	0	105	0	37	0	23	0	8.9
55	4	0	1	58	0	1	0	0	0	0	0	0	2		3	1	0	0	1	0	1	1	5	0	0	1	0	0	0	0	18.4	0	4.25	0	125	0	6.69	0	4.78	0	1.34	0	257	0	13	0	17	0	11.9
56	3		0	63	0	1	3	1	2	1	0	0	2		2	1	0	0	0	1	1	1	15	1	0	0	0	0	0	0	24.1	1	4.34	0	136	0	6.36	0	4.91	0	0.82	0	147	0	71	1	43	1	320.3
57	4	0	0	78	1	1	1	1	4	1	0	0	1	1	3	1	0	0	1	1	0	1	7	0	1	0	1	0	0	0	23	0	4.21	0	134	0	10.16	1	7.16	0	1.84	0	275	0	97	1	155	1	74.6
58	1		0	62	0	1	0	0	2	1	0	0	1	1	2	1	0	0	1	0	0	0	0	0	0	0	0	0	1	0	30.1	1	4.61	0	139	0	4.27	0	2.67	0	1.08	0	98	0	14	0	13	0	10.7
59	3	0	0	67	1	1	0	0	0	0	0	0	2		3	1	0	0	1	0	1	1	5	1	0	0	0	0	0	1	23.6	0	4.16	0	131	0	4.41	0	2.94	0	0.94	0	132	0	11	0	15	0	10.6
60	3	0	1	62	0	1	0	0	0	0	1	1	2		3	1	0	0	1	0	1	1	2	0	0	0	0	0	0	0	27.2	1	4.51	0	135	0	6.53	0	3.67	0	2.24	0	244	0	21	0	19	0	14.4
61	3	0	0	65	1	1	3	1	0	0	3	1	2		3	1	0	0	0	1	1	0	0	0	0	0	0	0	1	0	24.9	1	3.87	0	115	1	10.41	1	8.62	1	1.02	0	309	1	61	1	53	1	295.6
62	2	0	1	69	1	1	0	0	2	1	0	0	1	1	3	1	0	0	1	1	1	0	0	0	1	0	0	0	0	0	22.7	0
63	3	0	0	52	0	1	2	1	0	0	0	0	1	1	3	1	0	1	0	0	0	0	0	0	1	1	0	0	0	0	24.7	1	4.41	0	132	0	6.59	0	4.45	0	1.4	0	250	0	57	1	31	0	331.4
64	4	0	0	79	1	1	0	0	0	0	0	0	1	1	0	1	0	0	1	0	0	0	0	1	1	0	0	0	0	0	25.8	1	3.63	0	109	1	7.74	0	4.55	0	2.15	0	246	0	17	0	10	0	6.1
65	4	0	0	54	0	1	1	1	1	1	0	0	0	0	3	1	0	0	1	0	0	0	0	0	0	0	0	0	1	0	23.7	0	3.99	0	127	0	6.87	0	3.73	0	2.51	0	212	0	6	0	14	0	11.3
66	3		0	51	0	1	0	0	2	1	0	0	2		3	1	0	0	1	1	0	0	0	0	0	0	0	0	1	1	27.1	1	5.07	0	152	0	5.36	0	3.9	0	1.06	0	158	0	379	1	137	1	237.5
67	4	0	0	56	0	1	1	1	2	1	0	0	0	0	3	1	0	0	1	0	1	1	10	0	0	0	0	0	0	0	20.5	0	3.87	0	125	0	9.06	0	6.35	0	1.4	0	132	0	120	1	64	1	10.8
68	2	0	1	65	1	1	0	0	6	1	0	0	2		3	1	0	0	1	1	1	0	0	0	0	0	0	0	0	0	20.8	0	4.4	0	150	0	7.15	0	5.47	0	1.19	0	256	0	295	1	149	1	116.8
69	3		0	49	0	1	0	0	0	0	1	1	2		2	1	0	1	0	0	0	0	0	0	0	0	0	0	1	1	29.4	1	4.75	0	151	0	6.53	0	3.67	0	2.38	0	258	0	18	0	12	0	8.8
70	2		0	61	0	1	1	1	0	0	0	0	2		2	1	0	0	0	1	0	1	5	0	1	0	0	0	1	0	21.2	0	4.44	0	142	0	9.09	0	7.02	0	1	0	242	0	180	1	133	1	354.9
71	4	0	0	65	1	1	1	1	0	0	0	0	1	1	3	1	0	1	0	0	0	0	0	0	0	0	0	0	0	0	18.7	0	5.37	0	159	0	7.49	0	6.07	0	0.65	0	373	1	55	1	64	1	40.01
72	3	0	1	52	0	1	3	1	0	0	0	0	1	1	3	1	0	0	1	1	1	0	0	0	0	0	1	1	0	0	20.8	0	3.95	0	114	1	5.33	0	2.88	0	2.02	0	277	0	80	1	187	1	45.64
73	4	0	0	81	1	1	0	0	6	1	0	0	2		3	1	0	0	1	0	0	0	0	0	0	0	0	0	0	0	20.7	0	4.25	0	128	0	5.28	0	3.53	0	1.3	0	184	0	7	0	13	0	11.8
74	3	0	0	55	0	1	3	1	5	1	0	0	2		2	1	0	0	1	0	0	0	0	0	1	0	1	0	1	1	26.5	1	4.63	0	137	0	10.54	1	8.79	1	1.08	0	208	0	10	0	3	0	17.4
75	3	0	0	51	0	1	0	0	0	0	1	1	1	1	3	1	0	0	1	0	0	0	0	0	0	0	1	1	1	0	28.4	1	4.61	0	153	0	7.25	0	5.18	0	1.25	0	208	0	58	1	43	1	15.1
76	4	0	0	70	1	1	1	1	0	0	0	0	1	1	0	1	0	0	1	0	0	0	0	0	0	0	1	0	0	0	26.7	1	4.17	0	131	0	6.1	0	3.77	0	1.57	0	207	0	18	0	17	0	13.9
77	3	0	1	74	1	1	0	0	2	1	0	0	2		3	1	0	0	0	0	1	0	0	0	0	0	0	0	0	0	24.7	1	4.3	0	128	0	9.8	0	6.71	0	1.99	0	244	0	15	0	20	0	7.1
78	4	0	0	57	0	1	1	1	6	1	0	0	0	0	3	1	0	0	1	0	1	0	0	0	0	0	0	0	1	0	25.2	1	4.88	0	150	0	10.43	1	5.93	0	3.39	0	288	0	24	0	29	0	10.4
79	3	0	0	45	0	1	0	0	6	1	0	0	2		3	1	0	0	1	0	1	0	0	0	1	0	0	0	0	0	25.3	1	5.15	0	156	0	6.02	0	3.96	0	1.53	0	177	0	25	0	20	0	15.1
80	3	0	0	50	0	1	1	1	0	0	0	0	1	1	3	1	0	0	1	0	0	1	10	0	0	0	0	0	0	1	24.1	1	5.29	0	161	0	6.88	0	4.79	0	1.73	0	219	0	17	0	18	0	22.7
81	1	1	0	71	1	1	1	1	6	1	0	0	2		0	1	1	0	1	1	0	0	0	0	0	0	0	0	0	0	22.5	0
82	3	0	0	61	0	1	1	1	0	0	2	1	1	1	3	1	0	0	1	1	1	1	3	0	0	0	0	0	1	1	28.7	1	4.61	0	130	0	6.65	0	3.76	0	2.04	0	357	1	48	1	172	1	79.44
83	1		0	40	0	1	0	0	2	1	0	0	2		3	1	1	0	1	0	1	0	0	0	0	0	0	0	0	0	25.3	1	4.63	0	152	0	8.66	0	6.62	0	1.45	0	220	0	60	1	51	1	9
84	4	0	1	58	0	1	1	1	2	1	0	0	0	0	3	1	0	0	1	0	0	1	4	0	0	0	1	0	0	0	21.8	0	4.42	0	128	0	14.18	1	12.09	1	1.24	0	216	0	29	0	25	0	18.3
85	3		0	68	1	1	3	1	2	1	0	0	2		3	1	0	0	1	0	1	1	20	0	0	0	0	0	1	1	23.5	0	4.66	0	139	0	8.31	0	5.91	0	1.74	0	110	0	9	0	20	0	13.5
86	4		0	60	0	1	1	1	2	1	0	0	2		3	1	0	0	1	0	0	1	3	0	0	1	0	0	0	0	23.9	0	5.15	0	159	0	10.5	1	7.45	0	1.66	0	272	0	35	0	24	0	7.6
87	1		1	66	1	1	0	0	0	0	0	0	1	1	0	1	0	1	0	0	0	0	0	0	0	0	0	0	0	0	23.9	0	4.02	0	122	0	5.26	0	2.77	0	2.19	0	209	0	20	0	29	0	6.1
88	4	0	0	60	0	1	2	1	6	1	1	1	2		3	1	0	0	1	0	0	0	0	0	0	0	0	0	0	1	29.4	1	4.65	0	139	0	6.85	0	3.67	0	2.32	0	211	0	13	0	13	0	12.5
89	4	0	0	32	0	1	1	1	6	1	0	0	2		3	1	1	0	1	0	0	1	2	0	0	0	1	0	0	0	24.8	1	5.59	0	157	0	6.34	0	4.39	0	1.42	0	100	0	133	1	72	1	15.3
90	3	0	0	61	0	1	2	1	2	1	0	0	2		2	1	0	0	0	1	0	0	0	0	0	0	0	0	1	1	20.4	0	4.5	0	138	0	8.03	0	5.6	0	2.65	0	156	0	427	1	284	1	341.4
91	3	0	0	55	0	1	0	0	0	0	0	0	1	1	3	1	0	0	1	0	0	1	10	0	0	0	0	0	0	0	22.1	0	5.01	0	164	0	10.33	1	5	0	4.66	1	272	0	19	0	11	0	12
92	4	0	1	44	0	1	3	1	6	1	0	0	2		3	1	0	0	1	0	0	1	5	0	0	0	1	0	0	0	19.7	0	4.47	0	133	0	5.62	0	3.12	0	1.61	0	301	1
93	3	0	0	51	0	1	0	0	3	1	0	0	2		3	1	0	0	1	0	0	0	0	0	0	0	0	0	0	0	22.2	0	4.65	0	134	0	9.7	0	7.32	0	1.46	0	256	0	394	1	177	1	137.4
94	1	0	0	75	1	1	2	1	5	1	0	0	2		0	1	0	0	0	1	0	1	5	0	0	0	0	0	0	1	15.9	0	3.59	0	108	1	3.85	0	2.84	0	0.54	0	149	0	134	1	112	1	386.8
95	4	0	0	57	0	1	0	0	1	1	0	0	2		3	1	0	0	1	0	1	1	10	1	0	0	0	0	1	1	26.4	1	4.91	0	151	0	9.6	0	6.68	0	1.58	0	232	0	13	0	33	0	26.2
96	2	0	1	65	1	1	1	1	6	1	0	0	2		3	1	0	0	1	1	0	0	0	0	0	0	0	0	0	0	20.5	0	4.77	0	145	0	4.88	0	2.7	0	1.59	0	256	0	119	1	75	1	160.8
97	1	0	1	52	0	1	0	0	0	0	3	1	2		3	1	0	0	1	1	0	0	0	0	0	0	0	0	0	0	20	0	4.55	0	140	0	4.86	0	3	0	1.5	0	200	0	22	0	25	0	21.8
98	2	0	0	57	0	1	2	1	0	0	0	0	2		3	1	0	0	0	0	0	1	8	1	1	0	0	0	1	1	18.3	0	4.15	0	123	0	12.5	1	9.12	1	1.77	0	389	1	76	1	82	1	297.8
99	4	0	0	58	0	1	1	1	2	1	0	0	2		3	1	0	0	1	0	1	1	15	0	0	0	0	0	0	0	24.3	1	4.45	0	130	0	8.03	0	6.9	0	0.4	0	121	0	48	1	48	1	83.8
100	3	0	1	64	0	1	1	1	6	1	0	0	2		0	1	0	0	1	1	1	1	5	0	1	0	1	0	0	0	23.9	0	4.6	0	142	0	8.61	0	7	0	0.81	0	333	1	111	1	50	1	137.4
101	3	0	0	56	0	1	0	0	3	1	0	0	2		0	1	0	0	1	1	1	0	0	0	0	0	0	0	0	0	17.1	0	3.53	0	115	1	4.16	0	1.91	0	1.53	0	226	0	200	1	158	1	33.2
102	3	0	0	61	0	1	0	0	6	1	2	1	2		0	1	0	0	1	1	1	0	0	0	1	0	0	0	0	0	20.4	0	4.76	0	137	0	10.83	1	5.79	0	0.75	0	227	0	95	1	48	1	292.6
103	4	0	0	70	1	1	1	1	5	1	0	0	2		3	1	0	0	1	0	1	0	0	0	0	0	0	0	0	0	20.8	0	3.78	0	120	0	5.74	0	2.34	0	1.99	0	161	0	13	0	12	0	6.3
104	4	0	0	75	1	1	0	0	6	1	0	0	2		3	1	0	0	1	0	0	1	2	0	0	0	0	0	0	0	24.8	1	4.56	0	133	0	11.49	1	8.79	1	1.81	0	411	1	23	0	18	0	10.4
105	3	0	0	57	0	1	1	1	0	0	0	0	1	1	3	1	0	0	1	1	1	1	5	0	0	0	0	0	0	0	21.5	0	4.06	0	120	0	4.17	0	2.61	0	0.96	0	247	0	481	1	761	1	125.1
106	4	0	0	67	1	1	0	0	0	0	0	0	1	1	0	1	1	0	1	0	1	0	0	0	0	0	0	0	0	0	23.5	0	4.52	0	134	0	6.07	0	3.98	0	1.43	0	136	0	14	0	18	0	8.2
107	1		0	52	0	1	0	0	0	0	0	0	1	1	0	1	0	0	1	1	0	0	0	0	1	0	0	0	1	1	18.5	0	4.47	0	135	0	5.4	0	3.26	0	1.3	0	247	0	40	0	28	0	13.6
108	3	0	0	71	1	1	0	0	1	1	0	0	2		2	1	0	0	1	0	0	0	0	0	0	0	0	0	0	0	20.1	0	3.36	1	109	1	5.77	0	4.54	0	0.63	0	215	0	236	1	163	1	480.5
109	4	0	1	61	0	1	3	1	2	1	0	0	2		3	1	0	0	1	0	0	1	8	0	1	0	0	0	0	0	26.1	1	3.93	0	120	0	6.33	0	5.22	0	0.72	0	102	0	13	0	16	0	11.6
110	2		0	65	1	1	0	0	2	1	0	0	2		3	1	0	0	1	0	0	0	0	1	1	0	0	0	0	0	23.9	0	3.95	0	135	0	5.43	0	3.06	0	1.68	0	82	0	17	0	17	0	11.7
111	4	0	0	41	0	1	0	0	5	1	0	0	2		3	1	0	0	1	0	0	0	0	0	0	0	0	0	0	0	24.7	1	5.03	0	150	0	7.44	0	5.91	0	0.82	0	248	0	120	1	28	0	12.4
112	3	0	1	50	0	1	0	0	5	1	2	1	2		3	1	0	0	1	0	1	1	6	0	1	0	0	0	0	0	24.5	1	4.35	0	147	0	5.1	0	3.19	0	1.4	0	186	0	26	0	25	0	9.7
113	4		1	64	0	1	1	1	0	0	0	0	1	1	0	1	0							1	0	0	0	0	0	0			4.13	0	126	0	4.21	0	2.67	0	0.82	0	182	0	55	1	37	0	9.1
114	4	0	0	71	1	1	1	1	0	0	0	0	2		3	1	0	0	1	0	0	1	7.5	0	0	0	0	0	0	0	18.6	0	4.87	0	152	0	7.55	0	5.68	0	1.16	0	241	0	47	1	29	0	9.9
115	4	0	0	69	1	1	0	0	0	0	0	0	2		0	1	0	0	1	1	0	0	0	1	1	1	0	0	0	0	26.3	1	3.46	1	112	1	10.95	1	9.2	1	1.25	0	410	1	74	1	102	1	183.3
116	3	0	0	63	0	1	0	0	0	0	0	0	2		2	1	0	0	0	1	0	0	0	1	0	0	0	0	1	0	19.6	0	3.84	0	117	1	9.11	0	6.97	0	1.05	0	131	0	54	1	26	0	38.9
117	2	0	0	45	0	1	0	0	2	1	0	0	2		3	1	0	0	1	0	0	1	10	0	0	0	0	0	1	1	23.7	0	5.03	0	157	0	4.6	0	2.89	0	1.3	0	173	0	13	0	13	0	9.9
118	4	0	0	55	0	1	1	1	6	1	0	0	2		3	1	0	0	1	0	0	1	4	1	0	0	1	0	0	1	26.1	1	3.44	1	110	1	6.44	0	4.65	0	1.32	0	151	0
119	4	0	0	59	0	1	3	1	1	1	0	0	2		3	1	0	0	1	0	0	0	0	0	0	0	0	0	0	1	24.8	1	4.68	0	142	0	9.15	0	6.88	0	1.72	0	255	0	12	0	24	0	10.9
120	4	0	0	63	0	1	1	1	0	0	0	0	1	1	0	1	0	0	1	0	0	1	10	0	0	0	0	0	1	0	22.2	0	4.97	0	151	0	8.59	0	6.19	0	1.56	0	242	0	54	1	62	1	23.2
121	3	0	0	66	1	1	0	0	0	0	0	0	1	1	3	1	0	0	1	0	0	1	5	0	0	0	0	0	1	0	24.1	1	3.99	0	128	0	7.19	0	3.11	0	3.28	0	170	0	20	0	23	0	14.7
122	3	0	0	51	0	1	0	0	6	1	0	0	1	1	0	1	0	0	1	1	1	0	0	0	0	0	0	0	1	1	23.3	0	4.7	0	139	0	7.38	0	5.43	0	1.17	0	173	0	20	0	32	0	33.2
123	2		0	54	0	1	3	1	6	1	0	0	2		2	1	0	0	1	1	1	1	12	1	1	0	1	0	1	1	21.5	0	4.26	0	136	0	5.82	0	3.15	0	1.96	0	247	0	19	0	18	0	14.6
124	3	0	1	77	1	1	1	1	0	0	3	1	1	1	0	1	0	0	1	1	0	1	20	1	1	1	0	0	0	0	28.6	1	3.75	0	117	1	5.33	0	3.32	0	1.29	0	236	0	296	1	319	1	25.8
125	4	0	1	78	1	1	1	1	0	0	0	0	1	1	3	1	0	0	0	0	1	1		0	1	0	0	0	0	0	20	0	4.69	0	138	0	8.44	0	5.98	0	1.69	0	217	0	11	0	15	0	7
126	1	0	1	73	1	1	0	0	2	1	0	0	2		3	1	0	0	1	0	1	1	5	0	1	0	0	0	0	0	24.4	1	3.75	0	103	1	7.46	0	4.71	0	1.58	0	292	0	18	0	19	0	6.3
127	4		1	47	0	1	1	1	5	1	0	0	0	0	2	1	0	0	1	1	0	1	3	0	0	0	0	0	0	0	24.2	1	5.03	0	151	0	8.77	0	5.48	0	2.22	0	212	0	14	0	15	0	5.8
128	4	0	0	60	0	1	2	1	0	0	0	0	1	1	2	1	0	0	1	0	0	0	0	0	0	0	1	0	0	0	27.5	1	3.78	0	113	1	6.29	0	4.36	0	1.03	0	121	0	44	1	95	1	141.7
129	4	0	0	48	0	1	1	1	0	0	0	0	2		2	1	0	0	1	0	0	0	0	0	0	0	0	0	1	1	26.3	1	4.26	0	137	0	5.47	0	3.54	0	1.39	0	159	0	69	1	39	0	10.8
130	4	0	0	68	1	1	2	1	0	0	0	0	1	1	3	1	0	1	0	0	0	0	0	0	1	0	0	0	1	1	22.5	0	4.96	0	149	0	10.7	1	7.25	0	2.55	0	240	0	26	0	24	0	15.4
131	4	0	0	50	0	1	2	1	0	0	0	0	2		3	1	0	0	1	1	0	1	15	1	0	0	0	0	0	0	24.6	1	4.35	0	139	0	5.82	0	3.54	0	1.5	0	254	0	161	1	62	1	189
132	1		1	59	0	1	1	1	2	1	0	0	0	0	0	1	0	1	0	0	0	0	0	0	0	1	0	0	0	0	19.9	0	4.41	0	130	0	4.83	0	2.98	0	1.49	0	258	0	38	0	51	1	6.3
133	4	0	0	60	0	1	1	1	1	1	0	0	0	0	3	1	0	0	1	0	0	0	0	1	0	0	1	0	1	1	25.6	1	5.42	0	175	0	7.78	0	4.96	0	1.79	0	137	0	36	0	28	0	13.5
134	4		1	59	0	1	1	1	0	0	0	0	2		2	1	0	0	1	0	0	0	0	0	1	0	0	0	0	0	28.8	1	3.57	0	119	1	5.01	0	3.2	0	1.21	0	129	0	11	0	18	0	6
135	3	0	0	41	0	1	0	0	0	0	0	0	2		3	1	0	0	1	0	1	0	0	0	0	0	0	0	0	0	20.1	0	5.48	0	168	0	6.18	0	4.14	0	1.42	0	284	0	18	0	27	0	4.3
136	1		1	51	0	1	0	0	0	0	1	1	1	1	3	1	0	0	1	0	0	0	0	1	0	0	0	0	0	0	26.9	1	4.19	0	132	0	4.14	0	2.59	0	1.33	0	260	0	9	0	13	0	7.2
137	3		0	59	0	1	2	1	6	1	0	0	2		3	1	0	1	0	0	0	0	0	0	0	0	0	0	0	0	27.8	1	4.32	0	141	0	5.1	0	3.06	0	1.47	0	193	0	13	0	16	0	19.7
138	4	0	0	61	0	1	1	1	0	0	0	0	1	1	0	1	0	0	1	0	0	1	8	0	0	0	1	0	1	0	20.8	0	4.99	0	155	0	6.38	0	4.04	0	1.52	0	181	0	188	1	61	1	40
139	3		0	49	0	1	0	0	0	0	0	0	1	1	2	1	1	0	1	0	1	1	10	0	0	0	0	0	0	0	23.9	0	3.93	0	130	0	7.38	0	4.82	0	1.28	0	179	0	24	0	21	0	8
140	1	0	0	58	0	1	2	1	0	0	0	0	2		3	1	0	0	0	0	0	1	5	1	0	0	0	0	0	0	18.3	0	4.61	0	148	0	2.85	0	1.55	0	0.89	0	120	0	301	1	173	1	46
141	3	0	0	72	1	1	1	1	0	0	0	0	1	1	3	1	1	0	1	0	0	1	5	0	0	0	0	0	1	1	18.3	0	5.5	0	169	0	5.34	0	3.83	0	1.14	0	224	0	22	0	22	0	17.6
142	1	0	1	70	1	1	0	0	6	1	0	0	2		0	1	0	0	0	1	0	0	0	0	1	1	0	0	0	0	22.7	0	3.75	0	116	1	4.5	0	2.6	0	1.36	0	159	0	416	1	358	1	153.5
143	4		0	61	0	1	1	1	0	0	0	0	2		3	1	0	0	1	0	0	0	0	0	0	0	0	0	0	0	22.4	0	4.45	0	134	0	5.05	0	3.24	0	1.24	0	135	0	43	1	24	0	15.99
144	2		1	62	0	1	0	0	0	0	1	1	1	1	3	1	0	0	1	1	1	1	4	1	0	0	0	0	0	0	24.8	1	4.56	0	131	0	6.97	0	4.77	0	1.44	0	221	0	143	1	90	1	149.9
145	4		0	73	1	1	1	1	0	0	2	1	1	1	0	1	0	0	1	0	0	1	3	0	0	0	0	0	0	0			4.28	0	136	0	6.91	0	5.07	0	1.19	0	83	0	153	1	115	1	70.8
146	4		0	64	0	1	3	1	6	1	0	0	2		0	1	0	0	1	0	0	1	15	0	0	0	0	0	1	0	37	1	4.17	0	127	0	5.95	0	3.91	0	1.34	0	179	0	9	0	21	0	14
147	3	0	0	65	1	1	0	0	2	1	0	0	2		0	1	0	0	1	0	0	1	5	1	1	0	0	0	0	0	24.7	1	4.53	0	127	0	6.61	0	4.72	0	1.1	0	94	0	14	0	10	0	18.7
148	4		0	57	0	1	2	1	0	0	0	0	2		3	1	0	0	1	0	0	0	0	1	1	0	1	0	1	1	26.7	1	3.87	0	134	0	5.89	0	4.48	0	0.71	0	194	0	21	0	18	0	11.1
149	1		1	63	0	1	0	0	2	1	0	0	1	1	2	1	0	0	1	1	0	0	0	0	0	0	0	0	0	0	22	0	4.06	0	127	0	5.27	0	3.18	0	1.6	0	270	0	213	1	108	1	209.2
150	2	0	1	50	0	1	0	0	6	1	0	0	1	1	3	1	0	0	1	0	0	1	5	1	1	0	1	0	0	0	20.7	0	4.62	0	124	0	5.92	0	3.39	0	1.2	0	171	0	41	1	42	1	6.7
151	3	0	0	30	0	1	0	0	2	1	0	0	2		3	1	0	0	1	0	0	1	10	0	0	1	0	0	0	0	25.2	1	4.97	0	153	0	4.9	0	3.43	0	0.97	0	288	0	60	1	67	1	88.1
152	2		1	38	0	1	0	0	5	1	0	0	2		3	1	0	1	0	0	0	0	0	0	0	0	0	0	0	0	20.7	0	4.51	0	137	0	5.83	0	3.67	0	1.88	0	196	0	7	0	21	0	5.1
153	3	0	1	61	0	1	3	1	1	1	0	0	2		0	1	0	0	1	0	0	1	5	0	0	0	0	0	0	0	20.3	0	4.61	0	138	0	6.46	0	4.21	0	1.77	0	241	0	8	0	17	0	5.5
154	4	0	0	36	0	1	3	1	0	0	0	0	1	1	3	1	0	0	1	1	0	1	15	1	0	0	0	0	0	0	26.6	1	4.38	0	114	1	5.24	0	3.22	0	1.22	0	224	0	20	0	40	0	407.2
155	3	0	1	46	0	1	0	0	0	0	0	0	2		3	1	0	0	1	0	0	0	0	0	0	0	0	0	0	0	23.5	0	4.32	0	108	1	5	0	3.53	0	1.09	0	335	1	30	0	28	0	2.9
156	2	0	1	73	1	1	3	1	0	0	0	0	2		2	1	1	0	0	1	0	0	0	0	1	0	0	0	0	0	32.7	1	4.09	0	130	0	6.59	0	5.52	0	0.82	0	215	0	70	1	73	1	133.1
157	4	0	0	74	1	1	0	0	6	1	0	0	2		3	1	0	0	1	0	0	1	5	0	0	0	0	0	1	0	23.5	0	4.2	0	136	0	6.09	0	4.47	0	1.18	0	218	0	26	0	22	0	11.5
158	3	0	0	52	0	1	0	0	0	0	0	0	0	0	3	1	0	0	0	0	1	0	0	0	0	0	1	0	0	0	25.9	1	3.85	0	123	0	6.95	0	4.64	0	1.64	0	91	0	24	0	14	0	10.7
159	4	0	0	64	0	1	1	1	0	0	0	0	1	1	0	1	0	0	0	0	1	1	10	1	1	0	0	0	1	1	23	0	3.67	0	124	0	7.99	0	3.64	0	2.89	0	94	0	12	0	14	0	7.5
160	4		0	50	0	1	1	1	2	1	0	0	2		3	1	0	0	1	0	0	0	0	0	0	0	1	1	1	1	21.5	0	4.22	0	122	0	6.22	0	3.66	0	1.44	0	185	0	43	1	38	0	13.7
161		0	1	74	1	1	3	1	0	0	0	0	1	1	3	1	0	0	0	1	0	0	0	1	1	0	0	0	0	0	24.8	1	2.99	1	92	1	7.57	0	6.19	0	0.88	0	339	1	92	1	160	1	117.2
162	4	0	0	64	0	1	1	1	0	0	0	0	0	0	3	1	0	0	1	0	0	1	13	0	1	0	1	0	1	1	24.1	1	4.4	0	135	0	6.1	0	4.26	0	0.96	0	246	0	52	1	82	1	312.9
163	3	0	0	64	0	1	0	0	0	0	0	0	1	1	0	1	0	0	1	0	0	1	5	0	0	0	0	0	1	1	24	1	4.68	0	147	0	2.84	0	1.82	0	0.69	0	100	0	135	1	36	0	27
164	4	0	0	67	1	1	1	1	0	0	0	0	2		0	1	0	0	1	1	0	0	0	0	0	0	0	0	0	0	21.1	0													16	0	43	1	14.9
165	1	0	0	56	0	1	1	1	2	1	0	0	2		3	1	0	0	1	1	0	1	10	1	0	0	1	0	0	0	19.6	0	3.49	1	96	1	5.2	0	3.7	0	0.84	0	228	0	69	1	79	1	6.3
166	4	0	0	53	0	1	3	1	0	0	0	0	1	1	3	1	0	0	1	0	0	1	14.5	0	0	0	1	0	1	1	16.2	0													16	0	18	0	7.2
167	3	0	1	60	0	1	3	1	0	0	0	0	2		3	1	0	0	1	0	0	1	4	0	0	0	0	0	0	0	23.4	0	4.08	0	129	0	4.39	0	2.49	0	1.49	0	185	0	27	0	25	0	30.4
168	2	0	0	63	0	1	0	0	0	0	0	0	1	1	0	1	0	1	0	0	0	0	0	1	0	0	0	0	0	0	23.9	0	4.63	0	132	0	4.26	0	2.3	0	1.53	0	177	0	33	0	32	0	4
169	4	0	0	66	1	1	2	1	0	0	0	0	1	1	0	1	0	0	0	1	1	0	0	0	0	0	1	0	0	0	24.8	1	4.65	0	144	0	5.33	0	3.29	0	1.3	0	146	0	190	1	110	1	141.6
170	4	0	0	47	0	1	3	1	6	1	4	1	2		3	1	0	0	1	0	0	0	0	0	0	0	1	0	0	1	22.8	0	4.06	0	117	1	12.1	1	9.31	1	1.47	0	354	1	23	0	28	0	6.7
171	3	0	1	52	0	1	0	0	2	1	0	0	2		3	1	0	0	1	0	0	1	3	0	0	0	0	0	0	0	23.6	0	4.77	0	134	0	5.96	0	3.68	0	1.82	0	182	0	15	0	16	0	7.8
172	4	0	1	62	0	1	2	1	2	1	0	0	2		0	1	0	1	0	0	0	0	0	1	1	0	0	0	0	0	23.5	0	2.87	1	93	1	10.07	1	8.89	1	0.71	0	133	0	72	1	40	0	11.7
173	4		1	64	0	1	0	0	0	0	0	0	1	1	0	1	1	0	1	0	0	1	6	1	1	0	1	0	0	0	20.5	0	4.03	0	119	1	5.08	0	2.52	0	1.78	0	205	0	135	1	51	1	124.6
174	3	0	0	75	1	1	3	1	0	0	0	0	2		2	1	0	0	1	0	0	1	5	0	0	0	0	0	1	1	18	0	4.77	0	164	0	5.06	0	3.12	0	1.59	0	172	0
175	1	0	0	62	0	1	1	1	0	0	0	0	1	1	0	1	0							0	1	0	1	0	0	0	22.9	0
176	3	0	1	53	0	1	0	0	2	1	0	0	2		2	1	0	0	1	0	0	1	2	0	0	0	0	0	0	0	28.8	1	3.86	0	58	1	5.84	0	3.69	0	1.46	0	242	0	7	0	12	0	7.4
177	2		0	78	1	1	0	0	2	1	0	0	2		0	1	0	0	0	0	1	1	11	0	0	1	1	0	0	0	20.4	0	3.14	1	117	1	3.72	0	2.58	0	0.67	0	214	0	7	0	12	0	14.4
178	2		1	53	0	1	0	0	6	1	0	0	2		2	1	0	0	1	0	0	0	0	0	0	0	1	1	0	0	21.6	0	4.5	0	130	0	3.37	0	1.86	0	1.01	0	128	0	27	0	49	1	6.8
179	3		0	61	0	1	0	0	0	0	0	0	1	1	0	1	0	0	0	1	0	1	2.5	1	0	0	0	0	0	0	22.9	0	4.62	0	144	0	5.44	0	3.27	0	1.36	0	244	0	627	1	357	1	98.8
180	3		0	49	0	1	0	0	0	0	0	0	1	1	3	1	0	0	1	0	0	0	0	0	0	0	0	0	0	0	20.7	0	4.96	0	153	0	7.94	0	5.48	0	1.8	0	179	0	18	0	19	0	11.1
181	2		0	41	0	1	0	0	0	0	0	0	1	1	3	1	0	1	0	0	0	0	0	0	0	0	0	0	0	0	25.8	1	5.54	0	169	0	8.77	0	6.67	0	1.51	0	195	0	24	0	18	0	9.6
182	3	0	1	69	1	1	0	0	0	0	0	0	1	1	0	1	0	0	0	1	0	1	2	1	1	0	0	0	0	0	25.3	1	4.59	0	140	0	7.07	0	2.85	0	3.28	0	232	0	22	0	29	0	52.6
183	4		0	58	0	1	0	0	0	0	0	0	1	1	3	1	0	0	1	0	0	1	5	0	0	0	0	0	0	0	32	1	5.5	0	115	1	4.76	0	2.87	0	1.57	0	172	0	132	1	68	1	15.5
184		0	0	77	1	1	1	1	0	0	0	0	1	1	0	1	0	0	1	0	0	1	5	1	1	0	0	0	0	0	20.2	0
185	3	0	1	64	0	1	1	1	0	0	0	0	1	1	3	1	0	0	1	0	1	1	5	0	0	0	0	0	0	0	20.3	0	4.41	0	134	0	3.72	0	2.32	0	1.05	0	143	0	14	0	17	0	14.5
186	1	0	0	57	0	1	0	0	0	0	0	0	1	1	0	1	0	1	0	0	0	0	0	1	1	1	0	0	0	1	24.2	1	4.89	0	153	0	8.68	0	5.72	0	1.99	0	272	0	34	0	22	0	11.2
187	4	0	0	58	0	1	1	1	0	0	0	0	1	1	0	1	0	0	1	0	1	1	5	0	0	0	0	0	0	0	22.5	0	4.19	0	123	0	5.67	0	4.55	0	0.88	0	174	0	36	0	45	1	26.9
188	4	0	0	72	1	1	1	1	0	0	0	0	1	1	0	1	0	1	0	0	0	0	0	0	1	0	1	0	0	0	29.4	1	4.77	0	143	0	6.19	0	4.06	0	1.19	0	135	0	52	1	42	1	15.7
189	4	0	1	63	0	1	3	1	0	0	0	0	1	1	0	1	0	0	1	0	0	0	0	0	1	0	1	0	0	0	17.5	0	4.91	0	137	0	4.38	0	3.19	0	0.9	0	111	0	6	0	18	0	18.3
190	3		0	52	0	1	1	1	2	1	0	0	1	1	0	1	0	0	1	1	0	0	0	0	0	0	0	0	0	0	25.4	1	4.34	0	134	0	5.76	0	3.51	0	1.51	0	120	0	90	1	47	1	359.7
191		0	1	61	0	1	1	1	4	1	0	0	1	1	0	1	1	0	1	0	1	0	0	0	1	0	1	0	0	0	17.8	0
192	2		1	68	1	1	0	0	2	1	0	0	1	1	0	1	0	1	0	0	0	0	0	1	1	0	0	0	0	0	23.4	0	4.51	0	128	0	4.28	0	3.1	0	1.58	0	176	0	8	0	9	0	6.7
193	3		1	56	0	1	2	1	6	1	0	0	1	1	0	1	0	0	0	1	0	0	0	0	0	0	0	0	0	0	23.8	0	4.87	0	142	0	8.19	0	6.44	0	1.04	0	214	0	557	1	266	1	140.5
194	2	0	0	58	0	1	2	1	0	0	0	0	1	1	2	1	0	0	1	0	0	1	1	1	0	0	1	1	0	0
195	2	0	0	56	0	1	1	1	6	1	0	0	1	1	0	1	0	0	0	1	0	0	0	0	0	0	0	0	0	0	22.5	0	3.73	0	124	0	5.39	0	3.29	0	1.22	0	213	0	162	1	99	1	222.6
196	4		0	60	0	1	0	0	0	0	0	0	2		3	1	0	0	1	0	0	1	5	0	0	0	0	0	0	0	21.5	0	4.29	0	132	0	7.57	0	5.22	0	1.88	0	230	0	23	0	16	0	15.2
197	3	0	1	63	0	1	3	1	2	1	0	0	1	1	0	1	0	0	1	0	0	0	0	0	0	1	0	0	0	0	19.1	0	3.74	0	125	0	3.36	0	1.86	0	1.19	0	209	0	15	0	21	0	8
198	3	0	0	58	0	1	0	0	1	1	0	0	1	1	0	1	0	0	0	1	0	0	0	1	0	0	0	0	0	0	26.4	1	4.09	0	129	0	10.57	1	7.06	0	2.12	0	331	1	36	0	18	0	13.5
199	4	0	1	86	1	1	2	1	0	0	0	0	1	1	0	1	0	0	1	0	0	0	0	0	1	0	0	0	0	0	18.9	0	4.31	0	133	0	6.14	0	4.02	0	1.48	0	213	0	8	0	15	0	6.2
200	3		0	79	1	1	1	1	0	0	0	0	1	1	0	1	0	1	0	0	0	0	0	0	0	0	0	0	0	0	22.1	0	4.82	0	153	0	6.58	0	4.37	0	1.53	0	151	0	12	0	12	0	10
201	3	0	0	70	1	1	0	0	0	0	2	1	1	1	0	1	0	0	1	0	0	0	0	1	1	0	0	0	0	0	24	1	5.21	0	162	0	5.96	0	4.5	0	0.93	0	162	0	8	0	14	0	10.7
202	1	0	0	75	1	1	2	1	0	0	0	0	1	1	0	1	0	0	0	1	0	0	0	0	0	0	0	0	0	0	25.6	1	5.11	0	158	0	7.61	0	5.49	0	1.33	0	172	0	33	0	50	1	309.8
203	3	0	1	70	1	1	0	0	6	1	0	0	1	1	0	1	0	0	1	1	0	1	5	1	1	0	0	0	0	0	25.1	1	3.7	0	115	1	7.86	0	6.19	0	0.99	0	164	0	15	0	21	0	14.9
204	1		1	61	0	1	0	0	0	0	0	0	1	1	0	1	0	0	1	0	0	1	5	1	1	0	0	0	0	0	17.1	0	4.3	0	134	0	5.77	0	3.96	0	1.38	0	213	0	11	0	27	0	1.8
205	3		1	70	1	1	1	1	6	1	0	0	1	1	0	1	0	0	1	0	0	1	5	0	0	0	0	0	0	0	21	0	4.8	0	143	0	5.42	0	3	0	1.71	0	226	0	61	1	54	1	8.7
206	4		0	62	0	1	0	0	2	1	0	0	1	1	0	1	0	0	1	1	0	0	0	0	0	0	0	0	0	0	24.8	1	3.99	0	121	0	4.97	0	2.84	0	1.23	0	293	0	239	1	117	1	289.2
207	3	0	0	49	0	1	0	0	0	0	0	0	1	1	0	1	0	0	1	0	0	0	0	0	1	0	0	0	1	1	24.8	1	4.14	0	102	1	5.1	0	3.18	0	1.37	0	414	1	10	0	11	0	4.2
208	3		1	56	0	1	0	0	0	0	0	0	1	1	0	1	0	0	0	0	0	1	5	1	0	1	0	0	0	1	22.3	0	4.85	0	145	0	6.75	0	4.66	0	1.71	0	216	0	94	1	89	1	8.9
209	4	0	0	58	0	1	1	1	0	0	0	0	1	1	0	1	0	0	0	0	0	1		0	0	0	0	0	0	0	24.2	1	4.26	0	123	0	6.12	0	4.7	0	0.85	0	122	0	48	1	113	1	8.6
210	2	0	0	67	1	1	0	0	0	0	0	0	1	1	0	1	0	1	0	0	0	0	0	0	0	0	0	0	1	0	18.7	0	5.07	0	155	0	7.94	0	5.81	0	1.42	0	178	0	12	0	41	1	12.3
211	3		1	49	0	1	1	1	0	0	0	0	1	1	0	1	0	0	1	1	0	0	0	0	0	0	0	0	0	0	24	1	4.1	0	119	1	7.06	0	5.1	0	1.46	0	307	1	300	1	178	1	280.9
212	3	0	1	54	0	1	1	1	0	0	0	0	1	1	0	1	0	0	1	0	0	0	0	0	1	0	0	0	0	0	24.4	1	4.24	0	127	0	5.23	0	3.35	0	1.53	0	255	0	12	0	15	0	10
213	1	0	1	62	0	1	1	1	0	0	0	0	1	1	0	1	0	0	1	1	0	1	2	0	1	0	0	0	0	0	23.7	0	3.99	0	118	1	6.7	0	5.36	0	0.93	0	165	0	548	1	71	1	136.4
214	1	0	0	59	0	1	0	0	0	0	0	0	1	1	0	1	0	0	0	1	0	0	0	0	1	0	0	0	1	1	27.8	1	3.77	0	115	1	12.56	1	9.15	1	1.99	0	373	1	47	1	59	1	389.9
215	4	0	1	77	1	1	2	1	0	0	0	0	1	1	0	1	0	0	1	1	0	1		0	1	0	0	0	0	0	22.3	0	3.82	0	121	0	4.79	0	3.24	0	1.01	0	193	0	68	1	112	1	419.3
216	2		1	49	0	1	1	1	0	0	0	0	1	1	0	1	0	0	1	0	0	0	0	0	0	0	0	0	0	0	22.6	0	4.42	0	129	0	10.77	1	7.51	1	2.16	0	289	0	7	0	10	0	10.1
217	3		0	51	0	1	0	0	0	0	0	0	1	1	0	1	0	0	1	1	0	0	0	0	0	0	0	0	0	0	20.1	0	4.78	0	143	0	5.59	0	3.74	0	1.32	0	290	0	53	1	69	1	79.8
218	2	0	0	49	0	1	0	0	6	1	0	0	1	1	0	1	0	0	1	0	1	0	0	0	0	0	0	0	0	0	17.9	0	4.18	0	136	0	5.54	0	3.26	0	1.56	0	137	0	30	0	34	0	6.5
219	2		0	48	0	1	1	1	0	0	0	0	1	1	0	1	0							0	0	0	0	0	0	0	22.8	0	4.4	0	124	0	6.27	0	3.68	0	2.06	0	325	1
220	2		0	67	1	1	1	1	0	0	2	1	1	1	0	1	0							0	0	0	0	0	0	0
221	3	0	0	50	0	1	0	0	0	0	0	0	1	1	0	1	0	0	1	0	0	0	0	0	0	0	0	0	0	0	19.8	0	4.52	0	142	0	3.88	0	2.82	0	0.65	0	125	0	425	1	276	1	31.2
222	3	0	0	56	0	1	0	0	0	0	0	0	1	1	0	1	0	0	1	1	0	1	6	0	0	0	1	0	1	1	24	1	3.85	0	115	1	9.11	0	7.32	0	0.99	0	104	0	31	0	12	0	27.8
223	1		1	70	1	1	0	0	6	1	0	0	1	1	0	1	0	1	0	0	0	0	0	1	0	0	0	0	0	0	26.4	1	4.82	0	154	0	7.57	0	4.51	0	2.31	0	214	0	21	0	26	0	16.9
224	3	0	0	70	1	1	1	1	0	0	0	0	1	1	0	1	0	0	0	1	0	1	10	0	1	0	0	0	0	0	27.4	1	4.09	0	122	0	7.73	0	5.08	0	1.39	0	201	0	88	1	63	1	226.5
225	3	0	1	68	1	1	0	0	2	1	0	0	1	1	0	1	0	0	1	1	0	0	0	0	0	0	0	0	0	0	24	1	3.89	0	112	1	5.84	0	4.18	0	1.18	0	209	0	34	0	26	0	53.1
226	2		1	70	1	1	0	0	0	0	0	0	1	1	0	1	1	0	1	1	1	0	0	1	0	0	0	0	0	0			3.48	1	100	1	13.88	1	12.37	1	1.04	0	320	1	138	1	215	1	595.3
227	1		1	53	0	1	1	1	0	0	0	0	1	1	0	1	1	1	0	0	0	0	0	0	0	0	0	0	0	0	19.5	0	3.35	1	107	1	3.96	0	1.92	0	1.62	0	358	1	27	0	29	0	66.9
228	3	0	1	65	1	1	1	1	0	0	0	0	1	1	0	1	0	0	1	0	0	0	0	0	1	0	0	0	0	0	19.8	0	4.58	0	128	0	7.94	0	4.29	0	2.88	0	505	1	1	0	10	0	16
229	3		0	57	0	1	1	1	0	0	0	0	1	1	0	1	0	0	1	0	0	1	5	0	0	0	0	0	1	1	17.8	0	4.63	0	142	0	8.1	0	4.57	0	2.85	0	185	0	12	0	11	0	10.1
230	3	0	1	58	0	1	1	1	2	1	0	0	1	1	0	1	0	0	1	1	0	0	0	0	0	1	0	0	0	0	22.9	0	4.92	0	145	0	5.95	0	3.99	0	1.13	0	254	0	322	1	233	1	446.5
231	4	0	1	71	1	1	2	1	2	1	0	0	1	1	0	1	0	1	0	0	0	0	0	1	1	0	0	0	0	0	22.9	0	4.59	0	132	0	5.24	0	3.33	0	1.12	0	90	0	100	1	131	1	9.3
232	4	0	0	67	1	1	1	1	6	1	0	0	1	1	0	1	0	0	1	0	0	1	15	0	1	0	0	0	1	1	21.2	0	5.24	0	138	0	9.83	0	7.7	1	1.33	0	124	0	67	1	40	0	12.2
233	3	0	1	64	0	1	2	1	0	0	0	0	1	1	0	1	0	0	0	1	0	1	2	1	1	0	0	0	0	0	24	1	5	0	156	0	9.83	0	7.89	1	1.13	0	397	1	87	1	59	1	91.3
234	4	0	0	52	0	1	2	1	0	0	0	0	1	1	0	1	0	0	1	0	0	1	5	0	0	0	0	0	1	0	31	1	5.07	0	152	0	9.02	0	5.7	0	2.28	0	198	0	93	1	58	1	12.7
235	1		1	60	0	1	0	0	0	0	0	0	1	1	0	1	0	0	1	0	0	1	5	0	0	0	0	0	0	0	22.4	0	3.61	0	107	1	6.09	0	3.9	0	1.63	0	145	0	9	0	8	0	7
236	4	0	1	29	0	1	0	0	2	1	4	1	1	1	0	1	0	0	1	1	0	1	5	0	0	0	0	0	0	0	17.3	0	5.22	0	98	1	5.22	0	3.82	0	0.86	0	253	0	96	1	99	1	253.3
237	2	0	1	65	1	1	0	0	0	0	0	0	1	1	0	1	0	0	1	0	0	0	0	1	0	0	0	0	0	0	26.9	1	3.97	0	130	0	9.44	0	7.02	0	1.22	0	271	0	15	0	23	0	10.1
238	4		0	56	0	1	1	1	0	0	0	0	2		0	1	0	0	1	0	0	1	10	1	1	0	0	0	1	1	25.3	1	4.51	0	145	0	6.09	0	4.58	0	0.94	0	179	0
239	2		0	54	0	1	1	1	4	1	0	0	1	1	0	1	0	0	1	0	0	0	0	0	0	0	0	0	0	0	22.6	0	4.72	0	144	0	8.62	0	5.78	0	1.92	0	192	0	16	0	14	0	15.2
240	3		0	53	0	1	0	0	6	1	0	0	1	1	0	1	0	0	0	1	0	0	0	0	0	0	0	0	0	0	24.6	1	4.53	0	141	0	9.29	0	5.35	0	2.93	0	272	0	157	1	76	1	477.2
241	3		1	77	1	1	0	0	0	0	0	0	2		0	1	0	0	1	0	0	1	2	0	0	0	1	0	0	0	21.6	0	3.94	0	123	0	5.46	0	3.46	0	1.63	0	248	0	12	0	14	0	5.5
242	2	0	0	61	0	1	1	1	0	0	0	0	1	1	0	1	1	0	1	0	0	1	5	0	1	0	0	0	1	1	25.2	1	4.32	0	143	0	8.55	0	5.42	0	2.57	0	191	0	13	0	18	0	10.1
243	3		1	49	0	1	0	0	0	0	3	1	1	1	0	1	0	0	1	0	0	1	4	0	1	0	0	0	0	0	26	1	4.41	0	133	0	4.31	0	2.64	0	1.34	0	226	0	204	1	50	1	96.7
244	3	0	1	72	1	1	0	0	0	0	0	0	1	1	0	1	1	0	1	0	0	0	0	0	0	0	0	0	0	0	22.5	0	4.24	0	130	0	6.3	0	4.22	0	1.4	0	242	0	14	0	21	0	8.7
245	4	0	0	66	1	1	2	1	0	0	0	0	1	1	0	1	0	0	1	0	0	1	5	1	0	0	0	0	1	0	22	0	4.04	0	119	1	7.85	0	5.97	0	1.26	0	190	0	400	1	487	1	15.4
246	4	0	1	35	0	1	1	1	2	1	0	0	1	1	0	1	0	0	1	0	0	1	20	0	0	0	0	0	0	0	27.5	1	4.07	0	125	0	7.15	0	5.23	0	1.13	0	198	0	28	0	18	0	12.4
247	3	0	1	47	0	1	0	0	0	0	0	0	1	1	0	1	0	0	1	0	0	0	0	0	0	0	0	0	0	0	22.6	0	4.07	0	122	0	6.18	0	3.69	0	1.58	0	169	0	13	0	16	0	10.3
248	4		0	74	1	1	1	1	6	1	0	0	1	1	0	1	0	0	1	0	0	0	0	0	0	0	0	0	0	0	20.9	0	4.82	0	139	0	4.12	0	2.33	0	1.28	0	163	0	44	1	29	0	15.1
249	3	0	0	72	1	1	0	0	0	0	0	0	1	1	0	1	0	1	0	0	0	0	0	1	1	0	0	0	0	0	28.4	1	4.89	0	149	0	5.3	0	3.35	0	1.51	0	182	0	12	0	13	0	11.7
250	3	0	1	72	1	1	1	1	0	0	0	0	1	1	0	1	0	0	1	0	0	1	7.5	1	1	0	1	0	0	0	22.3	0	4.52	0	133	0	7.48	0	3.88	0	2.92	0	136	0	15	0	16	0	11.9
251	4	0	1	72	1	1	0	0	0	0	0	0	1	1	0	1	0	0	1	0	0	1	5	0	0	0	0	0	0	0	18.2	0	4.04	0	138	0	9.94	0	8.34	1	0.86	0	93	0	14	0	26	0	12.7
252	2	1	1	56	0	1	0	0	2	1	0	0	1	1	0	1	0	0	1	0	0	0	0	0	0	0	0	0	0	0	23.7	0	4.21	0	142	0	5.59	0	3.39	0	1.77	0	138	0	27	0	23	0	9.2
253	3	0	1	72	1	1	0	0	0	0	0	0	1	1	0	1	0	0	0	1	0	0	0	1	1	0	0	0	0	0	24.3	1	4	0	122	0	9	0	7.23	0	1.14	0	356	1	263	1	192	1	205.3
254	1		1	54	0	1	2	1	6	1	0	0	1	1	0	1	0	0	0	1	0	1	4	0	0	0	0	0	0	0	27.3	1	5.24	0	156	0	5.26	0	3.33	0	1.15	0	340	1	58	1	32	0	75.7
255	3	0	0	59	0	1	1	1	0	0	0	0	1	1	0	1	0	0	0	1	0	1	7.5	0	0	0	0	0	1	1	24.5	1	3.76	0	110	1	8.37	0	5.65	0	1.67	0	126	0	67	1	40	0	36.2
256	4	1	0	64	0	1	1	1	0	0	0	0	1	1	0	1	0	0	1	0	0	1	5	0	0	0	1	0	1	1	19.6	0	5.45	0	166	0	7.74	0	5.15	0	1.36	0	210	0	30	0	30	0	12.9
257	3	0	1	76	1	1	0	0	1	1	0	0	1	1	0	1	0	0	1	1	0	0	0	1	1	0	0	0	0	0	29.9	1	4.2	0	139	0	6.25	0	4.57	0	0.95	0	237	0	26	0	36	0	51
258	1	1	0	50	0	1	1	1	2	1	0	0	1	1	0	1	0	0	0	1	0	1	6	1	0	0	0	0	1	1	14.4	0	4.06	0	128	0	5.06	0	2.45	0	2.11	0	215	0	146	1	72	1	9.2
259	2	0	0	66	1	1	0	0	6	1	0	0	1	1	0	1	0	0	1	0	0	1	5	0	0	0	0	0	0	0	17.8	0	4.45	0	130	0	6.88	0	4.79	0	1.34	0	139	0	4	0	10	0	14.4
260	4	1	0	55	0	1	0	0	0	0	0	0	1	1	0	1	0	0	1	0	1	0	0	1	0	0	0	0	0	0	25.8	1	5.31	0	157	0	7.33	0	4.44	0	2	0	171	0	11	0	12	0	12.6
261	2	0	0	57	0	1	1	1	0	0	0	0	1	1	0	1	0	0	0	0	0	1	7	0	1	0	1	1	1	1	25.6	1	4.14	0	114	1	3.67	0	2.51	0	0.88	0	117	0	8	0	8	0	8.3
262	3	1	1	60	0	1	0	0	0	0	0	0	1	1	3	1	0	0	1	0	0	0	0	0	0	0	0	0	0	0	26.7	1	3.95	0	112	1	4.7	0	2.31	0	1.9	0	218	0	11	0	16	0	4.1
263	4		0	61	0	1	2	1	0	0	0	0	1	1	0	1	0	0	1	0	0	0	0	1	0	0	0	0	1	1	29.7	1	4.55	0	126	0	4.43	0	2.53	0	1.57	0	254	0	6	0	11	0	1
264	3	0	0	48	0	1	0	0	0	0	0	0	1	1	0	1	0	0	1	0	0	0	0	0	0	0	0	0	1	1	27.1	1	5.28	0	154	0	11.15	1	9.41	1	0.71	0	124	0	15	0	13	0	13
265	4	0	1	63	0	1	2	1	0	0	0	0	1	1	0	1	0	0	0	1	0	0	0	1	1	0	0	0	0	0	29	1	4.9	0	144	0	9.6	0	7.75	1	1.14	0	129	0	106	1	167	1	414
266	1	0	0	61	0	1	0	0	2	1	0	0	1	1	0	1	0	0	1	0	1	1	10	1	0	0	0	0	1	1	24.5	1	4.63	0	140	0	5.78	0	3.55	0	1.64	0	194	0	36	0	28	0	7.7
267	4	0	1	48	0	1	1	1	2	1	0	0	1	1	0	1	0	0	1	0	0	1	5	0	1	1	0	0	0	0	26.6	1	5.21	0	149	0	12.8	1	8.26	1	4.43	1	363	1	28	0	34	0	15.2
268	1		1	64	0	1	0	0	0	0	0	0	1	1	0	1	0	0	1	0	0	1	12	0	1	0	0	0	0	0	19.5	0	3.64	0	120	0	4.26	0	2.25	0	1.56	0	234	0	57	1	58	1	13.3
269	1	1	0	60	0	1	0	0	0	0	0	0	1	1	0	1	0	0	1	0	0	0	0	1	1	0	0	0	0	0	27.2	1	4.49	0	140	0	6.92	0	4.39	0	1.88	0	207	0	13	0	19	0	15.9
270	4	0	0	82	1	1	0	0	0	0	0	0	1	1	0	1	0	0	1	0	1	0	0	1	0	0	1	1	1	1	17.3	0	4.19	0	123	0	8.91	0	5.81	0	1.88	0	231	0	4	0	12	0	9.4
271	2	1	1	41	0	1	0	0	0	0	0	0	1	1	0	1	0	1	0	0	0	0	0	0	0	0	0	0	0	0	25.7	1	4.05	0	130	0	7.86	0	5.04	0	1.89	0	256	0	7	0	9	0	12.8
272	1	0	0	48	0	1	0	0	0	0	3	1	1	1	0	1	0	0	1	0	0	1	1	0	1	0	0	0	0	0	27.4	1	4.64	0	146	0	6.26	0	4.42	0	1.22	0	172	0	20	0	17	0	13.9
273	4	0	0	66	1	1	1	1	0	0	0	0	1	1	0	1	0	0	1	0	0	0	0	1	1	0	0	0	0	0	23.7	0	3.98	0	127	0	3.82	0	2.15	0	0.87	0	186	0	5	0	9	0	8.4
274	4	0	1	60	0	1	2	1	1	1	4	1	1	1	0	1	0	0	1	0	0	0	0	0	0	0	1	0	0	0	27.2	1	3.91	0	118	1	9.47	0	7.56	1	1.36	0	153	0	10	0	16	0	23.2
275		0	0	56	0	1	2	1	0	0	0	0	1	1	0	1	0	0	1	0	1	0	0	0	0	0	1	0	1	0	20.9	0	4.18	0	143	0	8.85	0	3.74	0	3.76	0	220	0	22	0	29	0	19.6
276	4		0	27	0	1	0	0	2	1	0	0	1	1	0	1	0	0	1	0	0	1	10	0	0	0	0	0	0	0	17.2	0
277	4	0	0	50	0	1	0	0	2	1	0	0	1	1	0	1	0	0	1	0	0	1	10	0	0	0	0	0	1	1	21.5	0	4.69	0	152	0	7.14	0	5.15	0	1.31	0	188	0	14	0	15	0	9.7
278	4	0	1	57	0	1	0	0	0	0	0	0	1	1	0	1	0	0	1	0	0	1	15	1	0	0	0	0	0	0	19.1	0	4.53	0	136	0	7.93	0	6.02	0	1.3	0	183	0	10	0	16	0	12.8
279	4	0	0	51	0	1	1	1	0	0	0	0	0	0	0	1	0	1	0	0	0	0	0	0	1	0	0	0	0	0			4.52	0	138	0	11.28	1	9.19	1	1.1	0	209	0	86	1	125	1	77
280	3	0	1	49	0	1	0	0	5	1	0	0	1	1	0	1	0	0	1	0	0	0	0	0	0	0	0	0	0	0	26.6	1	4.14	0	130	0	3.52	0	1.7	0	1.38	0	232	0	11	0	15	0	6.8
281	3	0	0	61	0	1	0	0	6	1	0	0	1	1	0	1	0	0	1	1	0	0	0	0	1	0	0	0	0	0	21.7	0	4.84	0	145	0	9.17	0	6.31	0	1.9	0	376	1	670	1	464	1	673.1
282	4	0	0	49	0	1	1	1	6	1	0	0	1	1	0	1	0	0	1	0	0	0	0	0	0	0	0	0	1	1	27	1	4.23	0	138	0	7.14	0	4.75	0	2.06	0	183	0	33	0	22	0	16.7
283	3	0	0	64	0	1	0	0	0	0	0	0	0	0	0	1	0	0	1	0	0	0	0	0	0	0	0	0	0	0	23.3	0	4.53	0	134	0	8.03	0	6.15	0	1.13	0	225	0	8	0	9	0	14.9
284	3	0	0	51	0	1	0	0	0	0	0	0	1	1	0	1	0	0	1	0	0	0	0	0	1	0	0	0	0	0	27.7	1	4.64	0	135	0	11.05	1	8.73	1	1.16	0	359	1	40	0	26	0	17.8
285	2	1	1	43	0	1	0	0	0	0	0	0	1	1	0	1	0	0	1	0	0	0	0	0	0	0	0	0	0	0	27.3	1	4.49	0	139	0	5.75	0	3.28	0	1.94	0	227	0	13	0	15	0	9.2
286	3	0	1	43	0	1	1	1	0	0	2	1	1	1	3	1	0	0	0	0	0	1	5	0	0	0	0	0	0	0	19.1	0
287	4		0	61	0	1	0	0	0	0	0	0	1	1	3	1	0	0	1	0	0	1	7	0	0	0	0	0	0	0	23.1	0
288	3	0	0	43	0	1	1	1	3	1	0	0	1	1	0	1	0	0	1	0	0	1	6	0	0	0	0	0	0	0	18.4	0	4.55	0	127	0	4.27	0	2.86	0	1.23	0	224	0	102	1	34	0	5.1
289	4	0	1	74	1	1	2	1	0	0	0	0	1	1	0	1	0	0	1	0	0	0	0	1	0	0	0	0	0	0	28.8	1	4.35	0	133	0	9.03	0	7.59	1	1.02	0	202	0	10	0	15	0	21.2
290		0	0	50	0	1	2	1	0	0	0	0	2		3	1	0	0	1	0	0	1	9	0	1	0	0	0	1	1	25.9	1	3.89	0	117	1	12.91	1	9.85	1	1.47	0	168	0	65	1	99	1	302.6
291	4	0	0	73	1	1	2	1	0	0	0	0	0	0	3	1	0	0	1	0	0	1		0	0	0	0	0	0	0	20.4	0	4.37	0	132	0	5.62	0	3.92	0	1.11	0	166	0	114	1	79	1	131.3
292	1	1	0	43	0	1	0	0	0	0	3	1	1	1	3	1	0	1	0	0	0	0	0	0	0	0	0	0	1	1	26.2	1	5.01	0	158	0	6.69	0	4.01	0	1.95	0	166	0	33	0	20	0	11.4
293	4	0	0	61	0	1	0	0	0	0	0	0	1	1	3	1	0	1	0	0	0	0	0	0	0	0	0	0	0	0	20.3	0	4	0	116	1	12.4	1	10.1	1	1.21	0	320	1	30	0	20	0	7.8
294	4	0	0	67	1	1	3	1	0	0	0	0	1	1	3	1	0	0	1	0	0	1	10	0	0	0	0	0	0	0	18.4	0	5.15	0	147	0	5.86	0	3.93	0	1.38	0	193	0	23	0	19	0	9.2
295	3	0	1	65	1	1	0	0	2	1	0	0	1	1	3	1	0	0	1	0	0	0	0	0	1	0	0	0	0	0	25.4	1	4.36	0	135	0	5.18	0	2.66	0	1.97	0	272	0	50	1	38	0	47.8
296	3		0	58	0	1	0	0	6	1	0	0	1	1	3	1	0	0	1	0	0	0	0	0	0	0	0	0	0	0	20.5	0	4.88	0	161	0	5.24	0	2.89	0	1.79	0	211	0	258	1	118	1	254.2
297	1	0	0	65	1	1	1	1	2	1	0	0	1	1	3	1	0	0	1	0	0	0	0	0	0	0	0	0	0	0	22.2	0	3.62	0	115	1	4.45	0	2.67	0	1.28	0	181	0	148	1	100	1	13.8
298	4		1	56	0	1	0	0	0	0	0	0	1	1	3	1	0	0	1	1	0	0	0	0	0	0	0	0	0	0	17.3	0	3.82	0	118	1	4.42	0	2.72	0	1.01	0	223	0	24	0	29	0	115.7
299		1	1	69	1	1	1	1	6	1	0	0	1	1	3	1	0	0	1	1	0	1	2	0	0	0	1	0	0	0	16.5	0
300	1	1	1	50	0	1	0	0	6	1	0	0	1	1	3	1	0	1	0	0	0	0	0	0	0	0	0	0	0	0	20.6	0	4.47	0	138	0	6.19	0	3.29	0	2.51	0	203	0	15	0	30	0	60.9
301	2	1	1	42	0	1	0	0	0	0	0	0	1	1	3	1	0	0	0	1	0	0	0	0	0	0	0	0	0	0	18.9	0	3.97	0	119	1	4.32	0	2.97	0	0.95	0	177	0	465	1	241	1	140.2
302	4	1	0	57	0	1	2	1	0	0	0	0	1	1	3	1	0	0	1	1	0	0	0	0	0	0	0	0	0	0
303	4	0	0	70	1	1	2	1	6	1	0	0	1	1	3	1	0	0	0	1	0	0	0	1	0	0	1	0	0	0	32	1	3.32	1	106	1	9.33	0	7.29	0	1.47	0	294	0	20	0	35	0	100.25
304	3	0	1	65	1	1	0	0	6	1	0	0	1	1	3	1	1	0	1	0	0	0	0	0	0	0	0	0	0	0	20	0	4.1	0	128	0	3.57	0	1.79	0	1.35	0	214	0	9	0	16	0	8.2
305	2		0	53	0	1	1	1	1	1	0	0	1	1	3	1	0	0	1	0	0	0	0	0	1	0	0	0	1	1	24.1	1	4.34	0	138	0	4.95	0	3.53	0	0.87	0	109	0	39	0	31	0	11.3
306	2	0	0	70	1	1	1	1	0	0	0	0	1	1	3	1	0	0	1	0	0	1		0	0	0	0	0	0	0	19	0	4.9	0	147	0	6.18	0	4.13	0	1.61	0	124	0	9	0	9	0	11.5
307	1		1	59	0	1	0	0	0	0	0	0	1	1	3	1	0	1	0	0	0	0	0	0	1	0	0	0	0	0	28.4	1	4.2	0	125	0	4.48	0	2.53	0	1.36	0	145	0	12	0	13	0	7
308	1	0	0	62	0	1	0	0	6	1	0	0	1	1	3	1	0	0	1	0	0	1	2	0	0	0	0	0	0	0	26.1	1	4.81	0	151	0	8.54	0	4.54	0	3.21	0	283	0	21	0	26	0	7.9
309	3	0	1	73	1	1	0	0	0	0	0	0	2		3	1	0	0	1	0	0	0	0	1	1	0	1	0	0	0	24	1	4.2	0	127	0	7.65	0	4.8	0	1.43	0	356	1	176	1	128	1	47.2
310		0	0	74	1	1	0	0	0	0	0	0	2		3	1	0	0	1	0	0	1	5	0	0	0	0	0	0	0	22.7	0
311	2	1	1	55	0	1	0	0	0	0	0	0	1	1	3	1	0	0	1	0	0	0	0	0	0	0	0	0	0	0	26.8	1	4.17	0	126	0	6.62	0	3.64	0	2.6	0	284	0	23	0	33	0	4
312	2	0	0	55	0	1	0	0	0	0	0	0	1	1	3	1	0	0	1	0	0	0	0	0	0	0	1	0	0	0	21	0	4.74	0	144	0	10.13	1	6.97	0	2.41	0	193	0	16	0	16	0	9
313			1	68	1	1	0	0	2	1	0	0	1	1	3	1	0	0	1	1	0	1	10	0	0	1	0	0	0	0	19.5	0	3.36	1	106	1	6.55	0	5.36	0	0.78	0	296	0	40	0	39	0	30.6
314	4	0	0	69	1	1	1	1	0	0	0	0	0	0	3	1	0	0	1	0	0	1	8	1	0	0	0	0	1	1	18.6	0	4.91	0	140	0	3.29	0	2.27	0	0.68	0	53	0	13	0	11	0	31.9
315	4	0	0	49	0	1	1	1	2	1	0	0	1	1	3	1	0	0	1	0	0	1	2.5	0	0	0	0	0	1	1	28	1	4.63	0	146	0	4.17	0	2.42	0	1.27	0	177	0	15	0	33	0	12.8
316	3	0	0	66	1	1	0	0	0	0	0	0	1	1	3	1	0	0	1	1	0	0	0	0	0	0	0	0	0	0	20.7	0	3.73	0	115	1	13.73	1	11.12	1	1.02	0	226	0	147	1	68	1	70.4
317	3		0	66	1	1	0	0	0	0	0	0	1	1	3	1	0	0	1	0	0	0	0	0	0	0	0	0	0	0	19.8	0	3.59	0	112	1	9.49	0	7.52	1	0.91	0	115	0	7	0	12	0	13.4
318	3		0	34	0	1	0	0	0	0	0	0	1	1	3	1	0	0	1	0	0	0	0	0	0	0	0	0	0	0	21.6	0	4.48	0	137	0	4.89	0	2.98	0	1.32	0	204	0	480	1	193	1	223.7
319	3	0	0	79	1	1	3	1	0	0	0	0	2		3	1	0	0	1	1	0	0	0	1	1	0	0	0	0	1	23	0	4.09	0	124	0	5.23	0	3.69	0	1.17	0	107	0	14	0	21	0	12.3
320	4	0	0	66	1	1	0	0	0	0	0	0	1	1	3	1	1	0	1	0	0	1	5	0	0	0	0	0	0	0	15.4	0	4.7	0	136	0	5.27	0	3.99	0	0.94	0	294	0	7	0	11	0	2.8
321	3	0	0	44	0	1	1	1	6	1	2	1	1	1	3	1	1	0	0	1	0	0	0	0	0	0	0	0	0	0	23.7	0	3.95	0	131	0	8.78	0	5.85	0	1.82	0	249	0	87	1	84	1	437
322	4	1	0	67	1	1	1	1	0	0	0	0	1	1	3	1	0	0	1	0	0	1	2	0	0	0	1	0	0	0	21.9	0	4.37	0	135	0	3.83	0	2.79	0	0.65	0	121	0	15	0	14	0	10.7
323	4	0	0	57	0	1	2	1	0	0	0	0	1	1	3	1	0	0	1	0	0	1	5	0	0	0	0	0	0	0	19.7	0	4.71	0	133	0	6.04	0	4.47	0	0.85	0	126	0	73	1	52	1	8.8
324	4		1	69	1	1	0	0	0	0	0	0	1	1	3	1	0	1	0	0	0	0	0	0	1	0	1	0	0	0	24.7	1	3.98	0	133	0	4.65	0	3.09	0	1.06	0	105	0	49	1	22	0	10.6
325	4	0	0	49	0	1	0	0	2	1	0	0	1	1	3	1	0	0	1	0	0	1	5	1	0	0	0	0	0	0	26.7	1	4.33	0	129	0	8.83	0	6.48	0	1.08	0	161	0	20	0	25	0	9.5
326	4	0	1	56	0	1	0	0	0	0	0	0	1	1	3	1	0	0	1	0	0	0	0	1	1	0	0	0	0	0	23.8	0	3.75	0	112	1	6.23	0	3.65	0	1.83	0	233	0	16	0	18	0	9.1
327	3	0	0	51	0	1	0	0	0	0	0	0	1	1	3	1	0	0	0	1	0	0	0	1	1	0	1	0	0	0	26.8	1	4.48	0	143	0	4.48	0	3.04	0	0.95	0	125	0	73	1	58	1	182.6
328	3	0	1	58	0	1	2	1	0	0	0	0	0	0	3	1	0	0	0	1	0	0	0	0	0	0	0	0	0	0	25.5	1	4.15	0	129	0	9.15	0	5.95	0	2.55	0	210	0	544	1	199	1	32.9
329			0	82	1	1	0	0	0	0	0	0	1	1	3	1	0	0	1	0	0	0	0	0	0	0	0	0	0	0	19	0	3.92	0	130	0	3.68	0	2.01	0	1.26	0	246	0	18	0	20	0	14.3
330	3	0	1	66	1	1	0	0	6	1	0	0	1	1	3	1	0	0	0	1	0	0	0	0	0	0	0	0	0	0	20.7	0	4.17	0	124	0	8.53	0	6.35	0	1.28	0	336	1	44	1	69	1	312.9
331	2	0	1	63	0	1	0	0	0	0	0	0	1	1	3	1	0	0	1	0	0	1	10	1	0	0	1	1	0	0	23.1	0	4.52	0	131	0	5.75	0	3.11	0	2.21	0	202	0	57	1	35	0	13.3
332	3	0	0	58	0	1	0	0	0	0	0	0	1	1	3	1	0	0	1	0	0	0	0	0	0	0	0	0	0	0	24	1	4.44	0	144	0	7.61	0	4.37	0	2.54	0	188	0	34	0	38	0	45.2
333	3	0	1	50	0	1	0	0	4	1	0	0	1	1	3	1	0	0	1	0	0	1	5	0	0	0	0	0	0	0	20	0	4.18	0	120	0	5.12	0	3.4	0	1.28	0	229	0	9	0	9	0	6.4
334	1	0	1	69	1	1	0	0	0	0	0	0	2		3	1	0	0	0	1	0	1	10	0	0	0	0	0	0	0	30.4	1	3.5	0	107	1	4.87	0	2.9	0	1.25	0	221	0	34	0	31	0	31.4
335	2	0	0	49	0	1	2	1	6	1	0	0	1	1	3	1	0	0	1	1	0	1	5	0	0	0	0	0	1	1	26.3	1	4.89	0	147	0	4.52	0	2.2	0	1.4	0	298	0	115	1	68	1	512.6
336	4	0	0	51	0	1	1	1	6	1	0	0	1	1	3	1	0	0	1	0	0	0	0	0	0	0	1	0	1	1	23.2	0	4.96	0	143	0	7.62	0	4.34	0	2.19	0	256	0	44	1	35	0	8.7
337	3	0	0	64	0	1	0	0	0	0	0	0	1	1	3	1	0	0	1	0	0	1	10	1	0	0	0	0	0	0	27	1	3.71	0	109	1	8.62	0	6.33	0	1.13	0	211	0	105	1	21	0	43.7
338	3	0	1	62	0	1	1	1	2	1	0	0	1	1	3	1	0	0	0	1	0	1	6	0	0	0	0	0	0	0	27.2	1	3.34	1	108	1	4.14	0	2.73	0	0.95	0	202	0	729	1	623	1	202.8
339	3	0	0	55	0	1	0	0	0	0	0	0	1	1	3	1	0	0	1	0	0	0	0	0	0	0	0	0	0	0	27.4	1	5.34	0	172	0	7.35	0	5.23	0	1.48	0	234	0	26	0	26	0	42.9
340	4	0	0	51	0	1	1	1	0	0	0	0	1	1	3	1	0	0	1	1	0	1	3	0	0	0	0	0	0	1	24.6	1	4.86	0	149	0	3.32	0	2.18	0	0.69	0	129	0	157	1	49	1	178.9
341	1		1	53	0	1	0	0	6	1	0	0	1	1	3	1	0	0	1	1	0	0	0	0	0	0	0	0	0	0	20.8	0	3.76	0	122	0	5.06	0	3.7	0	0.92	0	224	0	231	1	80	1	230.1
342	4	0	0	58	0	1	2	1	6	1	0	0	1	1	3	1	0	0	1	0	0	1	10	0	0	0	1	0	0	1	22.9	0	3.75	0	117	1	17.99	1	15.34	1	1.25	0	259	0	277	1	493	1	303
343	3	0	1	57	0	1	0	0	2	1	0	0	1	1	3	1	0	0	1	0	0	0	0	0	0	0	0	0	0	0	20.3	0	4.45	0	128	0	5.85	0	3.67	0	1.76	0	212	0	7	0	14	0	8.9
344	2	1	1	57	0	1	0	0	2	1	0	0	1	1	3	1	0	0	1	1	0	1	6	0	0	0	0	0	0	0			3.96	0	120	0	11.92	1	8.61	1	1.63	0	305	1	166	1	118	1	53.6
345	1	0	0	67	1	1	0	0	1	1	0	0	1	1	3	1	0	0	1	0	0	0	0	0	0	0	0	0	0	0	22.2	0	4.93	0	153	0	5.46	0	3.16	0	1.76	0	179	0	36	0	29	0	33.2
346	2	0	0	43	0	1	0	0	2	1	0	0	1	1	3	1	0	0	1	0	0	0	0	0	0	0	0	0	0	1	23.5	0	4.33	0	136	0	4	0	2.57	0	1.03	0	111	0	15	0	14	0	18.2
347	3		1	52	0	1	0	0	0	0	0	0	1	1	3	1	0	0	1	0	0	0	0	0	0	0	0	0	0	0	24.1	1													11	0	18	0	11.2
348	2	0	1	47	0	1	0	0	0	0	0	0	1	1	3	1	0	1	0	0	0	0	0	1	0	0	0	0	0	0	24.5	1	4.29	0	123	0	6.22	0	3.77	0	1.87	0	226	0	11	0	12	0	5.8
349	2	0	1	67	1	1	1	1	0	0	0	0	1	1	3	1	0	0	1	0	0	0	0	0	1	0	0	0	0	0	19.5	0	4.52	0	136	0	5.35	0	3.07	0	1.72	0	237	0	14	0	21	0	12.4
350	2	0	1	61	0	1	2	1	0	0	0	0	1	1	3	1	0	0	1	0	0	0	0	0	0	0	1	0	0	0	24.4	1	3.67	0	114	1	8.42	0	5.17	0	2.38	0	225	0	50	1	39	0	16.6
351		1	0	34	0	1	2	1	2	1	0	0	1	1	3	1	1	0	1	1	0	0	0	0	0	0	1	0	1	1
352	3	0	0	63	0	1	0	0	0	0	0	0	1	1	3	1	0	0	1	0	0	0	0	0	0	0	0	0	0	0	24.2	1	4.19	0	141	0	5.06	0	2.66	0	1.63	0	173	0	16	0	18	0	37.9
353	3	0	1	48	0	1	0	0	0	0	0	0	1	1	3	1	0	0	1	1	1	0	0	0	0	0	0	0	0	0	26.3	1	4.28	0	133	0	5.32	0	3.87	0	0.91	0	296	0	585	1	470	1	445.4
354	2	1	0	77	1	1	1	1	5	1	0	0	1	1	3	1	0	0	1	0	0	0	0	0	0	1	0	0	0	0	22.8	0	4.02	0	131	0	3.71	0	2.64	0	0.72	0	103	0	12	0	15	0	9
355	2	0	0	69	1	1	0	0	0	0	0	0	1	1	3	1	0	0	1	0	0	1	5	0	0	0	0	0	0	0	19.4	0	4.13	0	124	0	8.7	0	5.95	0	1.48	0	303	1	33	0	27	0	6.8
356	4		0	50	0	1	2	1	0	0	0	0	1	1	1	0	0	0	1	1	0	1	9	0	0	0	0	0	1	1	25.4	1	4.11	0	130	0	12.46	1	10.18	1	0.98	0	313	1	56	1	44	1	232.4
357	2	0	0	72	1	1	0	0	5	1	2	1	1	1	1	0	0	1	0	0	0	0	0	0	1	1	0	0	1	0	22.8	0	5.43	0	179	0	4.62	0	2.56	0	1.64	0	114	0	15	0	19	0	18.5
358	3	1	1	64	0	1	2	1	0	0	0	0	1	1	1	0	0	0	1	0	0	0	0	0	1	0	0	0	0	0	27.6	1	3.83	0	110	1	10.6	1	8.66	1	0.98	0	257	0	17	0	12	0	11.4
359	3	0	0	70	1	1	0	0	6	1	0	0	1	1	3	1	0	0	1	0	0	1	4	0	1	0	0	0	1	1	23.8	0	4.92	0	152	0	6.32	0	3.44	0	1.96	0	236	0	15	0	18	0	7
360	3	0	0	55	0	1	2	1	2	1	0	0	1	1	1	0	0	0	1	1	0	0	0	1	0	0	0	0	0	0	24.2	1	3.96	0	126	0	7.39	0	4.92	0	1.44	0	228	0	43	1	29	0	182.4
361	1	1	0	67	1	1	0	0	0	0	0	0	1	1	1	0	0	0	1	0	0	0	0	0	1	1	0	0	0	0	25.4	1
362	4	0	1	51	0	1	1	1	6	1	4	1	1	1	1	0	1	0	1	0	0	0	0	0	0	0	0	0	0	0	23.7	0	4.35	0	135	0	7.17	0	4.54	0	2.03	0	165	0	38	0	29	0	5.5
363	4		1	63	0	1	1	1	0	0	1	1	1	1	2	1	0	0	1	0	0	0	0	0	1	0	0	0	0	0	19.6	0
364	3	0	1	66	1	1	0	0	0	0	0	0	1	1	3	1	0	1	0	0	0	0	0	0	1	0	0	0	0	0	27.1	1	4.34	0	137	0	5.86	0	3.3	0	2.09	0	221	0	22	0	9	0	6.9
365	1	1	0	31	0	1	0	0	2	1	0	0	1	1	2	1	0	0	1	0	0	0	0	0	0	0	0	0	0	0	25.2	1													38	0	26	0	11.5
366	3	0	0	44	0	1	0	0	1	1	0	0	1	1	2	1	0	0	1	1	0	1	3	0	0	0	0	0	0	1	28	1	4.83	0	150	0	6.04	0	4.18	0	1.31	0	226	0	311	1	125	1	251.6
367	4	0	0	50	0	1	0	0	0	0	0	0	1	1	2	1	0	0	1	0	0	1	1	0	0	0	0	0	0	0	28.1	1	5.59	0	156	0	19.02	1	14.75	1	2.73	0	273	0	26	0	15	0	10
368	3	1	1	54	0	1	0	0	6	1	0	0	1	1	2	1	0	0	1	0	0	0	0	0	0	0	0	0	0	0	21.9	0	3.81	0	126	0	8.69	0	7.45	0	0.81	0	190	0	281	1	189	1	149.5
369	4	0	0	56	0	1	0	0	2	1	0	0	1	1	2	1	0	0	0	1	0	1	5	0	0	0	1	0	1	1	24.1	1	4.46	0	122	0	14.79	1	11.02	1	1.5	0	206	0	120	1	118	1	262.3
370			1	59	0	1	1	1	6	1	0	0	1	1	2	1	0	1	0	0	0	0	0	0	0	0	0	0	0	0	25.6	1													24	0	24	0	6.9
371	3	0	1	65	1	1	0	0	6	1	0	0	1	1	2	1	0	0	1	0	0	0	0	1	0	0	0	0	0	0	23.1	0	4.37	0	142	0	7.98	0	5.77	0	1.43	0	210	0	18	0	11	0	13
372	3	0	0	56	0	1	0	0	0	0	0	0	1	1	2	1	0	0	1	0	0	0	0	1	0	0	0	0	0	0	25.4	1	4.65	0	145	0	5.69	0	4.07	0	1.19	0	237	0	22	0	16	0	6.3
373	3	0	1	64	0	1	0	0	0	0	0	0	1	1	2	1	0	0	1	0	0	1	10	0	0	0	1	0	0	0	22.9	0	5.12	0	155	0	10.46	1	7.9	1	1.93	0	146	0	44	1	24	0	7.5
374	4	0	1	59	0	1	1	1	6	1	0	0	1	1	2	1	0	0	1	0	0	1	5	0	1	0	1	0	0	0	26	1	4.57	0	136	0	5.33	0	3.21	0	1.73	0	189	0
375	3	0	1	66	1	1	2	1	0	0	0	0	1	1	2	1	0	0	1	1	0	0	0	1	0	1	0	0	1	0	23.6	0	4.64	0	136	0	8.76	0	5.65	0	2	0	243	0	82	1	82	1	55.7
376	4	0	0	60	0	1	0	0	0	0	0	0	1	1	2	1	0	0	1	0	0	0	0	1	1	0	0	0	0	0	21.7	0	4.63	0	146	0	4.35	0	3.05	0	0.97	0	226	0	7	0	9	0	17.5
377	2	0	1	63	0	1	0	0	2	1	0	0	1	1	2	1	0	0	1	0	0	1	2	0	0	0	1	0	0	0	17.3	0	5.74	0	176	0	6.21	0	3.83	0	1.95	0	207	0	12	0	14	0	3.8
378	1	0	0	55	0	1	0	0	0	0	0	0	1	1	2	1	0	0	0	1	0	0	0	0	0	0	0	0	1	0	26.2	1	3.41	1	110	1	6.64	0	3.71	0	1.6	0	221	0	150	1	106	1	353.6
379	3	0	0	58	0	1	0	0	0	0	0	0	1	1	2	1	0	0	1	0	0	0	0	0	0	0	0	0	0	0	21.6	0	4.73	0	146	0	6.27	0	4.13	0	1.44	0	112	0	11	0	11	0	10.9
380			1	59	0	1	1	1	0	0	0	0	1	1	2	1	0	0	1	0	0	0	0	0	0	0	1	0	0	0	19.5	0
381	4	0	0	67	1	1	0	0	0	0	0	0	1	1	2	1	0	0	1	0	0	0	0	0	0	0	0	0	0	0	20.7	0	3.95	0	116	1	9.27	0	6.57	0	1.84	0	202	0	9	0	11	0	13.7
382	3	0	0	70	1	1	1	1	0	0	0	0	1	1	2	1	0	0	0	1	0	1	5	0	0	0	0	0	0	0	22.9	0	3.95	0	119	1	5.19	0	3.49	0	0.81	0	201	0	74	1	42	1	136.5
383	3		1	76	1	1	1	1	0	0	0	0	1	1	2	1	1	0	1	0	0	1	3	0	1	0	0	0	0	0	31.6	1	5.48	0	150	0	5.48	0	3.21	0	1.75	0	191	0	11	0	16	0	11.2
384	3	0	1	58	0	1	0	0	0	0	0	0	1	1	2	1	0	0	1	0	0	0	0	0	1	0	0	0	0	0	25.6	1	4.95	0	147	0	6.08	0	3.89	0	1.74	0	197	0	18	0	18	0	9.2
385	3	0	0	52	0	1	1	1	0	0	0	0	1	1	2	1	0	0	1	0	0	1	10	1	0	0	0	0	0	0	25.9	1	5.26	0	167	0	5.56	0	2.88	0	2.23	0	192	0	30	0	16	0	11.6
386			1	59	0	1	1	1	0	0	0	0	1	1	2	1	0	0	1	0	0	0	0	0	1	0	0	0	0	0	25.6	1	4.14	0	122	0	4.79	0	3.41	0	0.95	0	154	0	22	0	21	0	11.2
387	4		0	32	0	1	2	1	6	1	2	1	1	1	2	1	0	0	1	0	0	1	10	0	0	0	0	0	1	1	22.9	0	3.41	1	110	1	6.64	0	3.71	0	1.6	0	221	0	395	1	382	1	26.4
388	2	0	0	67	1	1	0	0	2	1	0	0	1	1	2	1	0	0	1	1	0	0	0	1	0	0	0	0	0	0	20.8	0	3.43	1	115	1	5.62	0	3.7	0	1.09	0	262	0	411	1	254	1	368.1
389	3	0	0	40	0	1	2	1	1	1	0	0	1	1	2	1	0	0	1	1	0	0	0	0	0	1	0	0	0	0	22.8	0	3.71	0	108	1	8.44	0	5.8	0	1.41	0	261	0	100	1	41	1	296.6
390	3	0	0	57	0	1	0	0	0	0	0	0	1	1	2	1	0	0	0	0	1	1	15	0	1	0	0	0	0	1	22	0	4.73	0	142	0	3.56	0	2.07	0	1.07	0	153	0	73	1	59	1	29.2
391	4	0	1	48	0	1	0	0	0	0	0	0	1	1	2	1	0	0	0	0	1	1	4	0	0	0	1	0	0	0	21.3	0	4.2	0	123	0	4.39	0	2.74	0	0.86	0	185	0	39	0	18	0	3.7
392	3	0	0	71	1	1	2	1	0	0	0	0	1	1	2	1	0	0	0	1	0	0	0	0	1	0	0	0	0	0	24	1													30	0	30	0	105.4
393	3	0	0	73	1	1	0	0	0	0	0	0	1	1	2	1	0	0	1	1	0	0	0	0	0	0	0	0	0	0	26.2	1	3.77	0	128	0	4.47	0	3.09	0	0.85	0	229	0	154	1	105	1	59.8
394	4	0	0	57	0	1	2	1	0	0	2	1	1	1	2	1	0	0	1	0	0	0	0	0	0	0	1	0	0	0	22.1	0	5.08	0	168	0	6.59	0	3.97	0	2.13	0	201	0	16	0	18	0	25
395	3	0	0	52	0	1	3	1	0	0	0	0	1	1	2	1	0	0	1	1	0	0	0	0	1	1	0	0	0	0	25.5	1													74	1	35	0	8.8
396	3	0	1	55	0	1	0	0	0	0	0	0	0	0	3	1	0	0	1	1	0	0	0	0	0	0	0	0	0	0	22.7	0	3.91	0	118	1	8.74	0	7.01	0	1.03	0	253	0	292	1	272	1	195.7
397	2	0	1	63	0	1	3	1	2	1	0	0	1	1	2	1	0	0	1	0	0	0	0	0	0	0	0	0	0	0	23.7	0	3.65	0	110	1	4.94	0	3.47	0	1.01	0	268	0	92	1	139	1	15
398	3	0	0	56	0	1	1	1	2	1	0	0	1	1	2	1	0	0	1	0	0	1	5	0	0	0	0	0	0	0
399	2	1	1	50	0	1	0	0	0	0	0	0	1	1	2	1	0	0	1	0	0	1	3	0	0	0	0	0	0	0	22.4	0	4.8	0	143	0	7.54	0	5.24	0	1.77	0	239	0	15	0	17	0	1.8
400	3		0	59	0	1	0	0	0	0	0	0	1	1	2	1	0	0	1	0	0	1	10	0	0	0	1	0	0	0	22.3	0	4.79	0	150	0	5.79	0	3.47	0	1.56	0	162	0	12	0	12	0	21.6
401	4	0	0	58	0	1	2	1	0	0	0	0	1	1	2	1	0	0	1	0	0	0	0	1	1	0	0	0	1	1	29.4	1	4.51	0	141	0	7.56	0	4.99	0	1.51	0	190	0	260	1	92	1	210.2
402	2	1	0	39	0	1	0	0	6	1	0	0	1	1	2	1	0	1	0	0	0	0	0	0	0	0	0	0	1	1	18.7	0	5.13	0	157	0	6.88	0	3.59	0	2.23	0	213	0	22	0	10	0	11.5
403	3	0	1	61	0	1	1	1	6	1	2	1	1	1	2	1	0	0	0	1	0	0	0	1	1	0	0	0	0	0	22.6	0	3.98	0	120	0	12.06	1	9.05	1	2.05	0	331	1	293	1	202	1	348.8
404	1		0	51	0	1	0	0	6	1	0	0	1	1	2	1	0	0	1	0	0	0	0	0	0	0	0	0	0	0	19.8	0	3.67	0	121	0	10.06	1	6.65	0	1.11	0	293	0	193	1	119	1	333.9
405	3		1	50	0	1	0	0	0	0	0	0	1	1	2	1	0	0	1	0	0	0	0	0	1	0	0	0	0	0	21.1	0	4.32	0	129	0	6.05	0	4.04	0	1.41	0	208	0	9	0	12	0	3.6
406	4	0	1	58	0	1	0	0	0	0	0	0	1	1	2	1	0	0	1	0	0	1	5	0	0	0	0	0	0	0	19.5	0	4.23	0	123	0	3.78	0	2.26	0	0.92	0	137	0	13	0	17	0	8.9
407	3	0	1	71	1	1	2	1	0	0	0	0	1	1	2	1	1	0	1	1	0	1		1	1	0	0	0	0	0	18.9	0	4.15	0	123	0	7.99	0	5.81	0	1.44	0	191	0	628	1	501	1	275.2
408	4	0	0	60	0	1	2	1	2	1	0	0	1	1	2	1	0	0	1	0	0	0	0	0	0	0	0	0	0	0	21	0	3.35	1	117	1	4.2	0	3.16	0	0.55	0	93	0	49	1	41	1	17.7
409	3	0	0	53	0	1	2	1	0	0	0	0	1	1	2	1	0	0	0	0	0	1	8	0	0	1	0	0	1	1	22.2	0	3.53	0	113	1	4.83	0	2.73	0	1.5	0	135	0	128	1	56	1	43.9
410	3	0	1	41	0	1	0	0	0	0	3	1	1	1	2	1	0	0	1	0	0	0	0	0	0	1	0	0	0	0	21.1	0	3.91	0	122	0	4.82	0	2.51	0	1.86	0	190	0	36	0	25	0	11
411	3	0	1	62	0	1	0	0	0	0	0	0	1	1	2	1	0	0	1	0	0	0	0	1	0	0	0	0	0	0	21.4	0	4.31	0	128	0	6.48	0	3.42	0	2.56	0	150	0	265	1	106	1	28.6
412	4		0	42	0	1	2	1	0	0	0	0	1	1	2	1	0	1	0	0	0	0	0	0	0	1	0	0	0	0	26.8	1	5.73	0	171	0	4.81	0	3.27	0	1.1	0	89	0	37	0	54	1	31.5
413	3	0	0	59	0	1	0	0	6	1	4	1	1	1	2	1	0	0	1	0	0	0	0	0	0	0	0	0	0	0	19.4	0													13	0	13	0	9.7
414	4	0	0	51	0	1	1	1	6	1	0	0	1	1	2	1	0	0	1	0	0	0	0	1	1	0	1	0	0	1	34.3	1	4.8	0	139	0	11.19	1	8.61	1	1.38	0	310	1	52	1	40	0	11.91
415	3	0	0	50	0	1	0	0	0	0	0	0	1	1	2	1	0	0	1	0	0	0	0	0	0	0	0	0	1	0	21.9	0	4.83	0	153	0	8.42	0	5.25	0	2.38	0	275	0	8	0	10	0	3.9
416	3		0	61	0	1	0	0	0	0	0	0	1	1	2	1	0	0	1	0	0	0	0	1	1	0	0	0	1	1	27.7	1	4.03	0	126	0	8.84	0	5.38	0	2.47	0	274	0	7	0	11	0	8.1
417	3	0	1	45	0	1	1	1	5	1	0	0	1	1	2	1	0	0	1	0	0	0	0	0	0	0	1	0	0	0	21.9	0	4.4	0	123	0	5.89	0	3.14	0	2.29	0	254	0	18	0	23	0	3.9
418	3	0	0	54	0	1	0	0	6	1	0	0	1	1	2	1	0	0	1	0	0	0	0	0	0	0	0	0	0	0	19.4	0	4.89	0	148	0	3.72	0	1.99	0	1.34	0	184	0	12	0	33	0	13.6
419	3	0	1	53	0	1	0	0	6	1	0	0	1	1	2	1	0	0	1	0	0	0	0	0	0	0	0	0	0	0	22.8	0	4.38	0	133	0	5.12	0	2.56	0	1.94	0	214	0	7	0	11	0	6.5
420	3	0	1	63	0	1	0	0	0	0	0	0	1	1	2	1	0	0	1	0	0	0	0	1	1	1	0	0	0	0	22.9	0	3.9	0	115	1	7.65	0	4.87	0	2.16	0	233	0	12	0	9	0	10.3
421	2	0	0	74	1	1	0	0	0	0	0	0	1	1	2	1	0	1	0	0	0	0	0	1	0	0	0	0	0	0	18.6	0	3.7	0	130	0	7.13	0	4.12	0	1.95	0	241	0	23	0	21	0	5.2
422	3	1	1	59	0	1	0	0	0	0	3	1	1	1	2	1	0	0	1	0	0	0	0	0	0	0	0	0	0	0	30	1	4.07	0	127	0	7.29	0	5.64	0	1.17	0	235	0	434	1	185	1	380.2
423	3		1	66	1	1	0	0	2	1	0	0	1	1	2	1	0	0	1	0	0	0	0	0	0	0	0	0	0	0	26.4	1	3.97	0	124	0	4.26	0	2.48	0	1.27	0	139	0	28	0	21	0	11.3
424	4	0	0	76	1	1	2	1	0	0	0	0	1	1	2	1	0	0	1	0	0	1	1	0	0	0	1	0	0	0	26.6	1	4.62	0	147	0	7.44	0	4.78	0	1.95	0	157	0	15	0	20	0	31
425	3	0	0	63	0	1	1	1	0	0	0	0	1	1	2	1	1	0	1	0	0	0	0	0	0	0	0	0	1	1	22.3	0	4.05	0	118	1	6.24	0	4.38	0	1.14	0	193	0	25	0	22	0	7.6
426	3	0	1	58	0	1	0	0	2	1	0	0	1	1	2	1	0	0	1	0	0	0	0	0	1	0	0	0	0	0	26.8	1	4.43	0	127	0	7.6	0	5.01	0	1.86	0	210	0	13	0	11	0	7.1
427	2	1	1	61	0	1	0	0	0	0	2	1	1	1	2	1	0	0	0	0	1	0	0	1	0	0	0	0	0	0	19	0	4.1	0	128	0	5.19	0	2.81	0	1.62	0	128	0	43	1	28	0	6.7
428	1	1	0	73	1	1	0	0	0	0	0	0	1	1	2	1	0	0	1	0	0	0	0	0	0	0	0	0	1	1	18.6	0	2.99	1	99	1	2.78	0	1.47	0	0.91	0	156	0	7	0	15	0	13.9
429	2	0	1	66	1	1	0	0	0	0	0	0	1	1	2	1	0	0	1	1	0	1	6	1	0	0	1	0	0	0	22.2	0	3.77	0	122	0	6.54	0	4.05	0	1.72	0	174	0	405	1	257	1	70.1
430	4	0	0	41	0	1	2	1	0	0	0	0	1	1	2	1	0	0	1	0	0	0	0	0	0	0	0	0	0	0	22.2	0	3.63	0	114	1	4.14	0	2.04	0	1.58	0	196	0	10	0	9	0	5.9
431	3	0	1	49	0	1	0	0	0	0	0	0	1	1	2	1	0	0	1	0	0	0	0	0	0	0	0	0	0	0	19.5	0	4.24	0	82	1	2.9	0	1.54	0	0.78	0	188	0	16	0	20	0	3
432	4	0	0	57	0	1	0	0	2	1	0	0	1	1	2	1	0	0	1	0	0	1	4	0	0	0	1	0	1	0	21	0	3.65	0	122	0	12.02	1	9.51	1	0.91	0	191	0	15	0	53	1	5.5
433	4	0	0	43	0	1	3	1	2	1	0	0	1	1	2	1	0	0	1	0	0	1	8	0	0	0	0	0	1	0	26.4	1	4.95	0	135	0	6.38	0	4.76	0	0.93	0	215	0	41	1	31	0	8.3
434	4	0	1	75	1	1	2	1	0	0	0	0	1	1	2	1	1	0	0	0	0	1		0	0	0	0	0	0	0	22.4	0	3.52	0	112	1	7.71	0	6.03	0	1.18	0	192	0	18	0	25	0	9.5
435	4	0	1	64	0	1	0	0	0	0	0	0	1	1	2	1	0	0	1	0	0	0	0	1	1	0	0	0	0	0	28.9	1	4.63	0	148	0	5.97	0	3.02	0	2.25	0	163	0	10	0	15	0	5.2
436			1	66	1	1	0	0	2	1	0	0	1	1	2	1	0	0	1	1	0	1		0	0	0	0	0	0	0	30.4	1	3.15	1	63	1	5.34	0	2.37	0	2.4	0	411	1	175	1	97	1	57.9
437	2	1	0	48	0	1	1	1	2	1	0	0	1	1	2	1	0	0	0	0	0	1		0	0	0	0	0	1	1	19.4	0	3.45	1	113	1	8.79	0	6.11	0	1.92	0	270	0	44	1	25	0	173.7
438	3		1	42	0	1	2	1	2	1	0	0	1	1	2	1	0	0	0	1	0	0	0	0	0	0	0	0	0	0	21	0	3.9	0	117	1	4.74	0	2.92	0	1.2	0	186	0	401	1	204	1	368.5
439	4	0	1	41	0	1	1	1	0	0	0	0	1	1	2	1	0	0	1	0	0	1	4	0	0	0	0	0	0	0	22.4	0	4.47	0	132	0	6.78	0	4.96	0	1.33	0	194	0	11	0	21	0	11.8
440	3	0	0	57	0	1	1	1	0	0	0	0	1	1	2	1	0	0	1	0	0	0	0	0	0	0	0	0	0	0	20.7	0
441	4	0	0	53	0	1	1	1	0	0	0	0	1	1	2	1	0	0	1	0	0	1	3	0	0	0	0	0	1	1	21.6	0	4.31	0	146	0	4.95	0	2.87	0	1.53	0	106	0	21	0	23	0	13.2
442	3	0	0	71	1	1	2	1	0	0	0	0	1	1	3	1	0	0	1	1	0	0	0	0	0	0	0	0	0	0	19.6	0	3.56	0	109	1	7.9	0	5.62	0	1.15	0	227	0	219	1	181	1	610.7
443	4	0	0	67	1	1	1	1	0	0	0	0	0	0	2	1	0	0	1	1	0	0	0	0	0	0	0	0	0	0			4.51	0	136	0	6.91	0	4.63	0	1.37	0	318	1	175	1	152	1	223
444	2	0	1	61	0	1	0	0	6	1	0	0	1	1	2	1	0	0	1	0	0	1	5	0	0	0	0	0	0	0	24.9	1	3.22	1	102	1	5.28	0	3.98	0	1.01	0	122	0	8	0	15	0	7.1
445	3	0	0	63	0	1	0	0	6	1	0	0	1	1	2	1	0	0	0	0	1	1	10	1	0	0	0	0	1	1	19.7	0	3.78	0	114	1	7.66	0	5.86	0	1.16	0	350	1	156	1	50	1	260.7
446	1	0	1	47	0	1	1	1	0	0	3	1	1	1	2	1	0	0	1	1	0	1	1	0	0	0	0	0	0	0	24.2	1	3.26	1	111	1	8.81	0	6.82	0	1.11	0	341	1	99	1	85	1	46.5
447	4	0	1	63	0	1	2	1	0	0	0	0	1	1	1	0	0	0	1	0	0	0	0	1	0	0	0	0	1	0
448	4	0	0	49	0	1	0	0	6	1	0	0	1	1	2	1	0	0	1	0	0	1	10	1	0	0	0	0	1	1	25.6	1	4.07	0	140	0	4.41	0	3.02	0	1.07	0	51	0	19	0	29	0	9.2
449	3	0	0	65	1	1	0	0	0	0	0	0	1	1	2	1	0	0	1	0	0	0	0	1	0	0	0	0	0	0	20.6	0	4.26	0	125	0	5.67	0	4.27	0	1.03	0	164	0	15	0	16	0	11.9
450	1		0	56	0	1	0	0	0	0	0	0	1	1	2	1	0	0	1	0	1	1	10	0	0	1	0	0	1	1	19.7	0
451	3		0	61	0	1	0	0	0	0	0	0	1	1	0	1	0	0	1	0	0	1	10	1	1	0	0	0	0	0	28	1	4.7	0	133	0	8.73	0	6.06	0	1.58	0	333	1	21	0	21	0	15.4
452	1	0	1	40	0	1	0	0	0	0	0	0	2		0	1	0	1	0	0	0	0	0	0	0	0	0	0	0	0	24.2	1	3.89	0	125	0	6.9	0	5.71	0	0.9	0	170	0	22	0	23	0	8
453	2	0	1	64	0	1	0	0	0	0	0	0	1	1	3	1	0	0	1	0	0	0	0	0	0	0	0	0	0	0			3.16	1	100	1	6.76	0	5.42	0	0.81	0	243	0	33	0	57	1	186.9
454	2	0	1	78	1	1	2	1	6	1	0	0	1	1	3	1	0	1	0	0	0	0	0	0	0	0	0	0	0	0	15.2	0	4.54	0	141	0	4.35	0	2.2	0	1.6	0	214	0	27	0	34	0	32.1
455	2	1	1	66	1	1	0	0	0	0	0	0	1	1	3	1	0	0	1	1	0	1	5	1	0	0	0	0	0	0	24.2	1	3.55	0	109	1	7.4	0	5.02	0	1.53	0	244	0	99	1	65	1	243.2
456	2	0	0	57	0	1	0	0	0	0	0	0	1	1	3	1	0	0	1	0	0	0	0	1	1	0	0	0	0	0	25.1	1													4	0	9	0	4.6
457	3	0	0	73	1	1	0	0	0	0	0	0	1	1	3	1	0	0	1	0	0	1	6	0	1	0	0	0	1	0	20.6	0	3.35	1	100	1	4.6	0	2.81	0	1.24	0	227	0	56	1	99	1	6.1
458	3		0	55	0	1	0	0	0	0	0	0	1	1	3	1	0	0	1	0	0	1	5	0	0	0	0	0	0	0	23.5	0	5.21	0	162	0	5.54	0	3.11	0	1.07	0	192	0	12	0	9	0	12.4
459	3		0	42	0	1	0	0	2	1	2	1	1	1	3	1	0	0	1	1	1	1	20	0	0	0	0	0	1	0	24.7	1	4.31	0	124	0	3.95	0	2.26	0	0.98	0	120	0	35	0	22	0	139.6
460	4		0	48	0	1	2	1	0	0	0	0	1	1	3	1	0	0	1	0	0	0	0	0	0	0	0	0	0	0	25.5	1	4.64	0	146	0	7.2	0	4.52	0	2.06	0	184	0	30	0	26	0	9.9
461	3	0	1	64	0	1	0	0	0	0	0	0	0	0	3	1	0	0	1	0	1	1	7	1	1	0	0	0	0	0	24.8	1	3.88	0	110	1	14.32	1	12.41	1	0.87	0	142	0	37	0	25	0	17.1
462	1	0	1	66	1	1	0	0	0	0	0	0	1	1	3	1	0	0	1	0	0	1	4	0	0	0	0	0	0	0	20.2	0													21	0	16	0	4.1
463	3		0	52	0	1	2	1	0	0	0	0	1	1	3	1	0	0	1	0	0	0	0	0	1	0	0	0	1	0	20.9	0	4.22	0	129	0	7.31	0	5.43	0	1.42	0	220	0	10	0	11	0	7.5
464	3	0	0	54	0	1	0	0	0	0	0	0	1	1	3	1	0	0	1	0	1	1	10	1	1	0	0	0	1	0	23.9	0	4.22	0	119	1	13.94	1	9.62	1	1.56	0	272	0	21	0	22	0	80.2
465	3		1	50	0	1	0	0	6	1	0	0	1	1	3	1	0	0	1	1	0	0	0	0	0	0	0	0	0	0	21.4	0	3.81	0	111	1	4.99	0	3.32	0	1.06	0	294	0	36	0	68	1	75.3
466	3	0	0	65	1	1	0	0	0	0	0	0	1	1	3	1	0	0	1	0	1	1	5	1	1	0	1	0	1	0	19.4	0	3.63	0	113	1	3.39	0	1.39	0	1.72	0	206	0	5	0	9	0	8.5
467	3		0	73	1	1	0	0	6	1	0	0	1	1	3	1	0	0	1	0	0	1	5	1	1	0	0	0	0	0	26.4	1	4.53	0	150	0	4.79	0	3.19	0	1	0	110	0	14	0	16	0	20.9
468	3	0	0	74	1	1	0	0	0	0	0	0	1	1	3	1	0	0	1	0	1	1	20	0	0	0	0	0	0	0	19.6	0	3.4	1	108	1	3.23	0	1.79	0	0.98	0	114	0	16	0	55	1	25.3
469		0	1	62	0	1	2	1	6	1	0	0	1	1	3	1	0	0	1	0	1	0	0	1	0	0	0	0	0	0	26.3	1	3.79	0	100	1	6.99	0	4.28	0	2.53	0	278	0	25	0	16	0	15.9
470	3	0	1	59	0	1	0	0	2	1	0	0	1	1	3	1	0	0	1	0	0	1	5	1	1	0	0	0	0	0	20.7	0	4.57	0	136	0	4.12	0	2.46	0	1.26	0	140	0	28	0	22	0	10.5
471	3	0	1	71	1	1	0	0	6	1	0	0	1	1	3	1	0	0	0	1	0	1	2	1	0	0	0	0	0	0	19.8	0	3.76	0	116	1	3.93	0	2.31	0	1.25	0	172	0	20	0	18	0	5.4
472	3		0	48	0	1	0	0	0	0	3	1	0	0	3	1	0	0	1	0	0	1	10	0	0	0	0	0	1	1	20.2	0	4.31	0	121	0	5.59	0	3.29	0	1.72	0	212	0	21	0	19	0	7.1
473	3	0	1	58	0	1	1	1	0	0	2	1	1	1	3	1	0	0	0	1	0	1	7	0	0	0	0	0	0	0	21.2	0	3.89	0	122	0	4.04	0	2.5	0	1.15	0	253	0	114	1	39	0	16.9
474	3		0	58	0	1	0	0	0	0	0	0	0	0	3	1	0	1	0	0	0	0	0	1	0	0	0	0	1	0	22.9	0	4.84	0	144	0	10.43	1	7.41	0	1.61	0	313	1	7	0	10	0	6.2
475	2	0	0	72	1	1	0	0	6	1	0	0	1	1	3	1	0	0	1	0	0	0	0	0	0	0	0	0	1	0	26.3	1	4.59	0	142	0	6.26	0	4.12	0	1.73	0	139	0	12	0	16	0	14.8
476	4	0	0	43	0	1	0	0	6	1	0	0	1	1	3	1	0	1	0	0	0	0	0	0	0	0	0	0	0	0	22.9	0
477	4		0	62	0	1	1	1	6	1	0	0	1	1	3	1	0	0	1	0	0	0	0	1	0	0	0	0	0	0	27.8	1	5.13	0	156	0	6.64	0	3.63	0	2.32	0	210	0	18	0	21	0	7.1
478	3	0	0	71	1	1	0	0	0	0	0	0	1	1	3	1	0	0	1	0	0	0	0	0	0	0	1	1	1	1	23.5	0	3.47	1	114	1	2.79	0	1.39	0	0.95	0	69	0	10	0	13	0	10.1
479	4	0	0	57	0	1	1	1	0	0	0	0	1	1	3	1	0	0	0	0	0	1		1	0	0	0	0	0	0			4.61	0	139	0	4.47	0	3.16	0	1.02	0	210	0	17	0	13	0	12.6
480	2	0	0	60	0	1	1	1	0	0	1	1	1	1	3	1	0	0	1	0	0	1	3	0	0	0	0	0	0	0			4.73	0	146	0	6.55	0	4.35	0	1.62	0	71	0	8	0	11	0	20.2
481	4	0	0	54	0	1	1	1	0	0	0	0	0	0	3	1	0	0	1	0	0	0	0	0	0	0	0	0	1	1	20.8	0	4.15	0	99	1	7.66	0	5.88	0	0.87	0	577	1	11	0	14	0	3.9
482	4		0	55	0	1	2	1	0	0	0	0	0	0	3	1	0	0	1	0	0	0	0	0	0	0	0	0	0	0	27.1	1													192	1	237	1	23.4
483	3		1	37	0	1	0	0	0	0	0	0	1	1	3	1	0	0	1	1	0	0	0	0	0	0	0	0	0	0	22.5	0	3.8	0	97	1	5.11	0	2.6	0	1.81	0	153	0	336	1	191	1	94.5
484	4	0	0	56	0	1	0	0	2	1	0	0	1	1	3	1	0	0	0	1	0	0	0	1	1	0	0	0	0	0	20.1	0	3.69	0	113	1	4.48	0	2.7	0	1.01	0	97	0	189	1	74	1	51.5
485	2	0	0	66	1	1	1	1	0	0	0	0	0	0	3	1	0	0	1	1	0	0	0	0	0	0	0	0	0	0			3.82	0	115	1	4.13	0	2.16	0	1.35	0	110	0	42	1	30	0	239.9
486	3	0	0	44	0	1	0	0	5	1	4	1	0	0	3	1	0	0	1	0	0	0	0	0	0	0	0	0	0	0	24	1	3.86	0	116	1	11.2	1	8.87	1	1.19	0	220	0	19	0	39	0	7.6
487	3	0	0	46	0	1	1	1	5	1	0	0	1	1	3	1	0	0	1	1	0	1	12.5	0	0	0	0	0	1	1	18.8	0	4.9	0	155	0	6.35	0	3.21	0	2.54	0	150	0	52	1	79	1	32.2
488	3	0	0	77	1	1	1	1	6	1	0	0	1	1	3	1	0	0	1	1	0	1	5	0	1	0	0	0	0	0	22.9	0	4.07	0	127	0	7.09	0	5.36	0	1.02	0	320	1	95	1	69	1	300
489	3	0	1	58	0	1	0	0	1	1	0	0	1	1	3	1	0	0	1	1	0	1	5	0	0	0	0	0	0	0	19.3	0	3.86	0	112	1	2.99	0	1.63	0	1.05	0	106	0	152	1	138	1	32.5
490	3		0	51	0	1	2	1	0	0	0	0	1	1	3	1	0	0	1	1	0	0	0	0	1	0	0	0	0	0	21.6	0	4.61	0	142	0	3.89	0	2.01	0	1.4	0	160	0	314	1	40	0	20.6
491	3	0	1	66	1	1	0	0	0	0	0	0	1	1	3	1	0	0	1	1	1	0	0	0	1	0	0	0	1	0	27.2	1	3.09	1	107	1	4.29	0	1.38	0	2.68	0	124	0	50	1	49	1	72.6
492	3		1	58	0	1	0	0	6	1	0	0	1	1	3	1	0	0	1	1	0	1	5	1	0	0	0	0	0	0	21.1	0	3.06	1	100	1	7.04	0	4.59	0	1.65	0	159	0	441	1	273	1	364.4
493	4	0	0	58	0	1	2	1	0	0	0	0	1	1	3	1	0	0	1	0	0	0	0	0	0	0	0	0	1	0	22	0	3.96	0	131	0	6.43	0	3.69	0	2.25	0	81	0	11	0	14	0	12.1
494	3		0	59	0	1	0	0	1	1	0	0	1	1	3	1	0	0	1	0	0	1	25	1	1	0	0	0	1	1	22.9	0	3.57	0	107	1	6.35	0	3.72	0	2.01	0	190	0	164	1	177	1	344.1
495	3		0	45	0	1	1	1		1	4	1	1	1	3	1	0	0	1	1	0	1	3	0	0	0	0	0	0	0	23.2	0	4.94	0	144	0	5.62	0	3.89	0	1.27	0	262	0	43	1	46	1	457.9
496	3	0	0	67	1	1	1	1	0	0	0	0	1	1	3	1	0	0	1	0	0	0	0	0	0	0	0	0	1	0	23.2	0	5.1	0	147	0	7.26	0	5.32	0	1.45	0	137	0	16	0	19	0	20.9
497	4	0	0	66	1	1	0	0	6	1	0	0	1	1	3	1	0	0	1	0	0	1	10	0	0	0	0	0	0	0	17.3	0	4.51	0	136	0	4.42	0	3.06	0	0.97	0	119	0	10	0	13	0	9.9
498	4	0	0	48	0	1	0	0	0	0	0	0	1	1	3	1	0	0	1	1	0	1	8	1	0	0	0	0	1	1	17.2	0	3.36	1	99	1	14.19	1	10.77	1	2.4	0	220	0	156	1	173	1	342.7
499	1		0	75	1	1	0	0	6	1	1	1	1	1	3	1	0	0	0	1	0	1	10	1	1	0	0	0	0	0	20.8	0	3.65	0	105	1	5.52	0	4.08	0	0.6	0	278	0	255	1	207	1	333.5
500	1	0	0	51	0	1	1	1	0	0	0	0	0	0	3	1	0	0	1	1	0	1		0	0	0	0	0	0	0	19	0	4.58	0	142	0	6.26	0	3.98	0	1.52	0	341	1	105	1	49	1	82.9
501	3	0	0	62	0	1	1	1	0	0	0	0	1	1	3	1	0	0	0	1	0	1	2	1	0	0	0	0	0	0	18.6	0	3.62	0	105	1	8.25	0	6.74	0	1.08	0	247	0	101	1	38	0	144.2
502	3	0	0	70	1	1	0	0	0	0	0	0	0	0	3	1	0	0	1	0	0	1	6	0	0	0	0	0	0	0	22.2	0	4.08	0	129	0	4.36	0	2.85	0	1.08	0	127	0	2	0	15	0	10.2
503	4	0	1	63	0	1	1	1	6	1	0	0	1	1	3	1	0	0	1	0	0	0	0	0	0	1	0	0	0	0			4.36	0	133	0	10.46	1	7.33	0	2.13	0	190	0	52	1	32	0	11.9
504	3	0	0	73	1	1	0	0	0	0	0	0	1	1	3	1	0	0	0	1	0	0	0	0	0	0	0	0	1	0	22.1	0	4.03	0	132	0	8.98	0	5.81	0	2.19	0	375	1	29	0	37	0	265
505	1	1	0	52	0	1	0	0	0	0	0	0	1	1	3	1	0	1	0	0	0	0	0	0	1	0	0	0	1	1	29.4	1	3.78	0	122	0	7.61	0	5.18	0	1.85	0	283	0	20	0	15	0	7.6
506	3		0	66	1	1	0	0	0	0	0	0	2		3	1	0	0	1	0	0	1	6	1	1	0	0	0	0	0	18.4	0	3.43	1	112	1	4.86	0	2.55	0	1.75	0	250	0	18	0	21	0	4.9
507	1	1	1	58	0	1	0	0	0	0	0	0	1	1	3	1	0	1	0	0	0	0	0	0	0	0	0	0	0	0	27.1	1	4.49	0	132	0	4.01	0	2.13	0	1.55	0	127	0	12	0	17	0	8.8
508	4	0	0	53	0	1	0	0	2	1	0	0	1	1	3	1	0	0	1	0	0	0	0	0	0	0	0	0	1	1	24.9	1	4.07	0	123	0	4.17	0	2.2	0	1.45	0	141	0	13	0	15	0	3.6
509	4	0	0	76	1	1	1	1	0	0	0	0	1	1	3	1	0	0	1	0	0	1	3	1	1	0	0	0	1	1	19.1	0	3.65	0	108	1	4.46	0	3.13	0	0.92	0	326	1	14	0	15	0	7.5
510			0	41	0	1	1	1	0	0	0	0	1	1	3	1	0							0	0	0	1	0	1	1	20.2	0
511	3	0	1	65	1	1	0	0	0	0	0	0	1	1	3	1	0	0	1	0	0	0	0	0	1	1	0	0	0	0	23.6	0	1.83	1	48	1	7.64	0	5.96	0	1.05	0	372	1	8	0	11	0	4.5
512	4	0	0	59	0	1	1	1	0	0	0	0	1	1	3	1	0	0	1	0	0	0	0	0	0	0	1	0	0	0	28.1	1	3.83	0	118	1	12.49	1	9.54	1	1.21	0	100	0	93	1	131	1	16.6
513	3	0	1	64	0	1	1	1	0	0	0	0	1	1	3	1	0	0	1	0	0	0	0	0	0	0	0	0	0	0	29.5	1	4.48	0	128	0	7.9	0	4.6	0	2.77	0	219	0	19	0	13	0	7.7
514	3	0	1	47	0	1	0	0	6	1	0	0	1	1	3	1	0	0	1	1	0	1	5	1	0	0	0	0	0	0	20.3	0	3.73	0	105	1	3.92	0	2.35	0	1.02	0	249	0	485	1	533	1	234.6
515	3		0	47	0	1	0	0	2	1	0	0	1	1	3	1	0	0	1	0	0	1	20	1	0	0	0	0	0	0	18.6	0	4.35	0	135	0	4.65	0	2.68	0	1.55	0	166	0	29	0	27	0	15.3
516	4	0	0	81	1	1	1	1	0	0	0	0	1	1	3	1	0	0	1	0	0	0	0	1	1	0	0	0	0	0	20.3	0	3.53	0	113	1	5.2	0	3.13	0	1.39	0	74	0	10	0	17	0	14
517	3	0	1	75	1	1	0	0	0	0	0	0	1	1	3	1	0	1	0	0	0	0	0	0	0	0	0	0	0	0	23.2	0	3.99	0	130	0	3.57	0	1.87	0	1.25	0	135	0	16	0	17	0	10.3
518	3	0	0	43	0	1	0	0	1	1	0	0	1	1	3	1	0	0	1	0	0	1	10	1	0	0	0	0	1	0	20.9	0	4.02	0	117	1	10.91	1	6.96	0	2.08	0	324	1	290	1	118	1	177.4
519	1	0	1	70	1	1	0	0	0	0	0	0	1	1	3	1	0	0	1	1	1	1	3	0	1	0	0	0	0	0	22.9	0	5.03	0	139	0	8.39	0	6.09	0	1.31	0	262	0	24	0	19	0	9.2
520	2	0	0	69	1	1	0	0	6	1	0	0	1	1	3	1	0	0	1	1	0	0	0	0	0	1	0	0	1	1	22.3	0	3.96	0	118	1	4.34	0	2.47	0	1.36	0	150	0	189	1	114	1	90.3
521	3	0	0	58	0	1	0	0	0	0	0	0	1	1	3	1	0	0	0	1	0	0	0	0	0	0	0	0	0	0	25.5	1	3.7	0	120	0	5.22	0	3.37	0	1.35	0	237	0	38	0	25	0	335
522	3	1	0	63	0	1	1	1	0	0	0	0	1	1	3	1	0	0	0	0	1	1	1	0	0	1	0	0	0	0			3.4	1	93	1	9.02	0	7.21	0	1.16	0	331	1	14	0	21	0	7.7
523	4	0	1	57	0	1	1	1	0	0	0	0	1	1	3	1	0	0	1	0	0	1	3	0	0	0	0	0	0	0	23.6	0	4.42	0	133	0	8.06	0	5.15	0	1.44	0	308	1	74	1	40	0	9.7
524	4	0	0	52	0	1	2	1	6	1	0	0	1	1	3	1	0	0	0	0	1	0	0	0	0	1	1	0	1	1	23.9	0	5.02	0	148	0	10.11	1	8.25	1	1.18	0	177	0	10	0	15	0	11.5
525	2	0	0	71	1	1	0	0	0	0	0	0	1	1	3	1	0	0	0	0	0	1	20	1	0	0	0	0	0	0	21	0	3.82	0	115	1	5.81	0	3.75	0	1.37	0	179	0	9	0	14	0	11
526	3	0	0	64	0	1	0	0	0	0	0	0	1	1	3	1	0	0	0	1	0	0	0	0	1	0	0	0	0	0	22.9	0	3.56	0	111	1	9.29	0	6.53	0	1.48	0	338	1	151	1	108	1	235.7
527	4	0	1	73	1	1	0	0	1	1	0	0	1	1	3	1	0	0	1	0	0	0	0	0	0	0	0	0	0	0			3.86	0	109	1	7.99	0	4.7	0	2.53	0	252	0	14	0	26	0	6.4
528	4	0	0	64	0	1	1	1	0	0	0	0	1	1	3	1	0	0	0	1	0	1	10	1	1	0	0	0	0	0	23.5	0
529	3	0	1	61	0	1	0	0	0	0	0	0	1	1	3	1	0	0	1	1	0	1	3	1	1	0	1	0	0	0	19.7	0	3.52	0	112	1	13.48	1	11.21	1	1.33	0	237	0	54	1	44	1	100.7
530	4		0	71	1	1	0	0	0	0	0	0	2		3	1	0	0	1	1	1	0	0	1	1	0	0	0	0	0	20.5	0	6.13	0	102	1	6.13	0	4.5	0	0.79	0	276	0	55	1	77	1	440.1
531	3		0	50	0	1	0	0	2	1	0	0	0	0	3	1	0	0	1	0	0	1	15	0	0	0	0	0	0	0	20	0	4.11	0	125	0	5.28	0	2.9	0	1.86	0	217	0	62	1	45	1	9
532	3	0	0	43	0	1	0	0	0	0	0	0	1	1	3	1	0	0	1	0	0	0	0	0	0	0	0	0	0	0	26.7	1	4.49	0	132	0	4.54	0	2.89	0	1.08	0	104	0	88	1	66	1	18.5
533	3	0	0	60	0	1	0	0	0	0	0	0	1	1	3	1	0	0	1	0	0	1	5	0	0	0	0	0	1	1	20.5	0	4.16	0	129	0	7.71	0	5.3	0	1.03	0	148	0	10	0	12	0	13.9
534	3	0	0	64	0	1	0	0	6	1	0	0	1	1	3	1	0	0	1	0	0	0	0	0	1	1	0	0	1	1	27.4	1	4.39	0	134	0	5.46	0	3.09	0	1.77	0	233	0	18	0	21	0	10.1
535	2	0	0	56	0	1	0	0	2	1	0	0	1	1	3	1	0	1	0	0	0	0	0	0	0	0	0	0	1	0	18.9	0	4.74	0	149	0	5.53	0	2.62	0	2.47	0	226	0	51	1	32	0	9
536	3	0	1	67	1	1	1	1	0	0	0	0	1	1	3	1	1	1	0	0	0	0	0	1	1	1	0	0	0	0			2.37	1	68	1	4.44	0	3.49	0	0.62	0	270	0	128	1	160	1	529.5
537	3		0	34	0	1	1	1	2	1	0	0	1	1	3	1	0	0	1	0	0	0	0	0	0	0	0	0	0	1															34	0	44	1	14.7
538	4	0	0	61	0	1	2	1	0	0	0	0	1	1	3	1	0	0	1	0	0	0	0	0	1	0	1	0	0	0			4.55	0	159	0	11.59	1	9.65	1	0.97	0	148	0	69	1	37	0	36.3
539	3	0	0	73	1	1	0	0	0	0	0	0	1	1	3	1	0	0	1	0	0	0	0	1	1	0	0	0	0	1	21.6	0	3.65	0	112	1	7.28	0	4.54	0	1.93	0	261	0	24	0	18	0	9.4
540	4	0	0	57	0	1	1	1	4	1	2	1	1	1	3	1	0	0	1	0	0	1	12	0	0	0	0	0	1	1	21.3	0	3.75	0	118	1	6.53	0	3.5	0	2.38	0	152	0	33	0	27	0	7
541	3	0	0	59	0	1	1	1	0	0	0	0	1	1	3	1	0	0	0	1	0	1	3	1	1	0	0	0	0	1	20.2	0													103	1	39	0	90.4
542	3		0	63	0	1	0	0	0	0	0	0	1	1	3	1	0	0	1	0	0	1	4	0	0	0	0	0	1	0	24.6	1	3.85	0	115	1	5.48	0	3.36	0	1.5	0	155	0	13	0	23	0	7.9
543	3	1	0	73	1	1	0	0	0	0	0	0	1	1	3	1	0	0	1	1	0	1	5	0	0	0	0	0	0	0	15.4	0	3.64	0	112	1	4.82	0	3.38	0	0.86	0	155	0	74	1	44	1	17.5
544	4	0	1	64	0	1	0	0	3	1	0	0	1	1	3	1	0	0	1	1	0	0	0	0	0	0	0	0	0	0	20	0	3.68	0	113	1	5.92	0	4.15	0	1.22	0	223	0	337	1	135	1	432.9
545	4	0	1	60	0	1	0	0	6	1	1	1	1	1	3	1	0	0	1	0	0	0	0	0	0	0	0	0	0	0	20.4	0	3.8	0	125	0	3.75	0	2.33	0	1.13	0	143	0	16	0	17	0	7.8
546	4	0	1	56	0	1	1	1	2	1	0	0	1	1	3	1	0	0	1	0	0	1	10	0	0	0	0	0	0	0	26.7	1	4.21	0	130	0	8.08	0	4.2	0	3.09	0	225	0	92	1	60	1	7.2
547	3	0	0	71	1	1	0	0	2	1	0	0	0	0	3	1	0	0	1	0	0	0	0	0	1	0	0	0	0	0	22.5	0	3.73	0	121	0	13.29	1	9.85	1	1.63	0	275	0	57	1	38	0	54.5
548	4	0	0	72	1	1	2	1	0	0	0	0	1	1	3	1	0	0	1	0	0	0	0	0	0	0	0	0	0	0	23.8	0	4.43	0	136	0	8.22	0	4.9	0	2.28	0	129	0	83	1	68	1	39.9
549	3	0	1	64	0	1	1	1	0	0	0	0	0	0	3	1	0	0	1	0	0	1	4	1	0	0	0	0	0	0	24.4	1	4.31	0	129	0	6.39	0	4.25	0	1.79	0	211	0	8	0	12	0	10.4
550	3	0	0	72	1	1	1	1	6	1	0	0	1	1	3	1	0							0	0	0	0	0	0	0
551	1		0	66	1	1	0	0	0	0	0	0	1	1	3	1	0	1	0	0	0	0	0	1	0	0	0	0	1	0	20.2	0	4.51	0	123	0	5.96	0	3.57	0	1.95	0	222	0	24	0	14	0	8.7
552	3	0	0	59	0	1	0	0	2	1	0	0	0	0	3	1	0	0	1	0	0	0	0	0	0	0	0	0	0	0	28.6	1	4.79	0	144	0	6.04	0	3.41	0	1.89	0	274	0	8	0	11	0	9.2
553	1	0	0	58	0	1	0	0	0	0	0	0	1	1	3	1	0	0	0	0	0	1	5	1	0	0	0	0	1	1	27.8	1	4.58	0	137	0	6.02	0	4.18	0	1.36	0	152	0	10	0	12	0	9
554	3	0	0	68	1	1	0	0	6	1	0	0	1	1	3	1	0	0	1	0	0	0	0	0	0	0	0	0	1	1	24.4	1	4.85	0	157	0	7.01	0	4.73	0	1.77	0	181	0	15	0	15	0	5
555	3	0	0	63	0	1	0	0	0	0	0	0	1	1	3	1	0	0	1	0	0	0	0	0	0	0	1	0	0	0	25.1	1	4.73	0	147	0	3.91	0	2.75	0	0.84	0	102	0	40	0	25	0	10.1
556	4	0	0	77	1	1	1	1	0	0	0	0	1	1	3	1	0	0	0	0	0	1	10	1	0	0	0	0	1	0	22.4	0	4.16	0	127	0	6.33	0	3.95	0	1.57	0	210	0	17	0	9	0	8.1
557	3	0	0	59	0	1	0	0	0	0	0	0	0	0	3	1	0	0	1	0	0	1	5	0	0	0	1	0	1	1	18.9	0	4.19	0	132	0	6.11	0	4.33	0	1.06	0	237	0	20	0	19	0	10.6
558	4	0	0	64	0	1	0	0	0	0	0	0	0	0	3	1	0	0	1	0	0	0	0	0	0	0	1	1	0	0	20.1	0	4.83	0	155	0	5.75	0	3.71	0	1.41	0	130	0	514	1	352	1	54.2
559	1		1	50	0	1	1	1	2	1	0	0	1	1	3	1	0	0	0	1	0	0	0	1	0	0	0	0	0	0	16.9	0
560	4		0	78	1	1	1	1	2	1	0	0	1	1	3	1	0	0	1	0	0	0	0	0	0	0	0	0	1	1	23.1	0	3.16	1	111	1	5.07	0	3.19	0	1.32	0	297	0	11	0	14	0	12.4
561	3	0	1	65	1	1	1	1	0	0	0	0	1	1	3	1	0	0	1	0	0	1	10	1	0	0	0	0	0	0	27.6	1	3.78	0	115	1	6.47	0	4.97	0	1.15	0	200	0	10	0	16	0	8.5
562	4	0	1	69	1	1	0	0	0	0	0	0	1	1	3	1	0	0	1	1	0	0	0	0	0	0	0	0	0	0	24.7	1	3.98	0	118	1	10.43	1	7.72	1	1.51	0	193	0	60	1	32	0	58.7
563	3		1	54	0	1	0	0	0	0	0	0	1	1	3	1	0	0	1	0	0	0	0	1	0	0	0	0	0	0	20.8	0	4.64	0	140	0	5.47	0	2.52	0	2.23	0	205	0	247	1	83	1	8.3
564	4	0	0	63	0	1	0	0	2	1	0	0	1	1	3	1	0	0	1	0	0	1	5	1	0	0	0	0	1	1	23.7	0	4.49	0	126	0	8.3	0	6.41	0	1.16	0	262	0	16	0	20	0	9.5
565	3	0	0	66	1	1	0	0	0	0	0	0	1	1	3	1	0	0	1	0	0	1	10	0	0	0	0	0	1	1	21	0	4.26	0	133	0	5.07	0	3.31	0	1.26	0	197	0	26	0	19	0	13.2
566	4	0	1	56	0	1	0	0	0	0	0	0	0	0	3	1	0	0	1	0	0	0	0	1	1	0	0	0	0	0	23.9	0	4.5	0	137	0	5.96	0	4.04	0	1.69	0	189	0	30	0	24	0	7.7
567	4	0	1	72	1	1	2	1	0	0	0	0	1	1	3	1	0	0	1	0	0	1	10	1	1	0	0	0	1	1	22.3	0	5.03	0	150	0	5.89	0	4.07	0	1.21	0	119	0	148	1	117	1	303
568	3	0	0	62	0	1	0	0	0	0	0	0	1	1	3	1	0	0	1	0	0	1	4	0	0	0	0	0	0	0	24.2	1	4.96	0	146	0	5.55	0	3.07	0	1.9	0	175	0	15	0	19	0	15.5
569	4		0	70	1	1	1	1	2	1	0	0	1	1	3	1	0	0	1	0	0	1	3	1	0	0	0	0	1	0	23.3	0	4.3	0	128	0	5.12	0	2.94	0	1.55	0	264	0	44	1	51	1	7.6
570	3		0	59	0	1	0	0	0	0	0	0	1	1	3	1	0	0	0	1	0	0	0	0	0	0	1	0	0	0	23.1	0	3.86	0	120	0	4.87	0	2.28	0	1.56	0	112	0	275	1	245	1	155.5
571	3	0	0	72	1	1	0	0	1	1	0	0	1	1	3	1	0	0	1	0	0	0	0	1	1	0	0	0	0	0	23.1	0	3.73	0	121	0	9.88	0	8.63	1	0.84	0	117	0	38	0	24	0	22.1
572	1	1	0	53	0	1	1	1	6	1	0	0	1	1	3	1	0	0	1	0	0	0	0	0	1	0	1	0	1	1	26.8	1	4.56	0	131	0	10.26	1	8.6	1	0.92	0	156	0	21	0	21	0	15.2
573	3	0	0	47	0	1	0	0	0	0	3	1	1	1	3	1	0	0	1	1	0	0	0	0	1	0	0	0	1	1	27	1	4.7	0	148	0	5.75	0	4.05	0	1.27	0	200	0	150	1	64	1	116.7
574	3	0	0	53	0	1	1	1	0	0	0	0	1	1	3	1	0	0	1	1	0	0	0	0	0	0	0	0	0	0	24.3	1	4.58	0	138	0	5.51	0	4.36	0	0.75	0	227	0	34	0	34	0	222.3
575	1		0	43	0	1	1	1	0	0	0	0	1	1	3	1	0	0	1	0	0	0	0	0	0	0	0	0	1	1	28.7	1	4.24	0	135	0	5.77	0	3.39	0	1.55	0	247	0	54	1	21	0	16.1
576	3	0	1	75	1	1	2	1	0	0	0	0	1	1	3	1	0	0	1	0	0	0	0	0	1	0	0	0	0	0	26.2	1	3.53	0	103	1	9.93	0	8.45	1	1.12	0	175	0	6	0	15	0	9.3
577	4	0	0	48	0	1	0	0	6	1	0	0	1	1	3	1	0	0	1	0	0	0	0	0	0	0	0	0	0	0	20.4	0	5.09	0	158	0	6.96	0	4.27	0	2.27	0	173	0	26	0	20	0	11.8
578	2		0	39	0	1	0	0	0	0	0	0	1	1	3	1	0	0	1	0	0	0	0	0	0	0	0	0	0	0	22.5	0	4.77	0	144	0	4.97	0	2.75	0	1.68	0	138	0	11	0	15	0	9.5
579	1	1	0	64	0	0	1	1	2	1	0	0	1	1	3	1	0	0	1	0	0	1	10	0	0	0	0	0	0	0	25.7	1	4.67	0	111	1	4.94	0	3.85	0	0.91	0	213	0	11	0	13	0	4
580	4	0	1	62	0	1	2	1	0	0	0	0	1	1	3	1	0	0	1	0	0	0	0	1	0	0	0	0	0	0	27.1	1	4.5	0	130	0	6.45	0	4.69	0	1.42	0	165	0	103	1	76	1	13.5
581	4	0	0	73	1	1	1	1	0	0	2	1	1	1	3	1	0	0	1	0	1	1		1	0	0	0	0	1	1	16.9	0
582	4		1	32	0	1	1	1	1	1	0	0	1	1	3	1	0	0	1	0	0	1	3	0	0	0	0	0	0	0	22.9	0	4.22	0	121	0	4.3	0	2.27	0	1.98	0	198	0	42	1	44	1	5.7
583	2		0	48	0	1	1	1	6	1	0	0	1	1	3	1	0	0	1	0	1	0	0	1	0	0	0	0	0	0	27	1	3.9	0	122	0	4.07	0	1.96	0	1.88	0	141	0	36	0	28	0	13.6
584	4	0	0	52	0	1	2	1	0	0	0	0	0	0	3	1	0	0	1	0	0	1	5	0	0	0	0	0	1	1	20.2	0	4.41	0	139	0	7.78	0	5.05	0	2.27	0	167	0	295	1	146	1	15.7
585	3		0	56	0	1	1	1	0	0	0	0	0	0	3	1	0	0	1	0	1	0	0	0	1	0	1	0	0	0			4.37	0	131	0	11.09	1	8.99	1	1.36	0	268	0	80	1	43	1	132.9
586	4		1	60	0	1	1	1	1	1	0	0	1	1	3	1	0	0	1	0	0	1	5	0	1	0	0	0	0	0	20	0	3.76	0	121	0	6.13	0	3.37	0	2.23	0	141	0	19	0	17	0	5
587	4	0	0	59	0	1	0	0	6	1	0	0	1	1	3	1	0	0	0	1	0	1	2	0	0	0	0	0	0	0	21.6	0	3.97	0	123	0	8.48	0	7.32	0	0.83	0	195	0	139	1	48	1	246.1
588	2		1	52	0	1	1	1	2	1	0	0	1	1	3	1	0	0	1	1	1	1	5	0	0	0	1	0	0	0	26.7	1	4.37	0	124	0	5.54	0	3.58	0	1.29	0	301	1	34	0	25	0	26.6
589	4		1	62	0	1	0	0	6	1	0	0	1	1	3	1	0	0	1	0	0	0	0	0	0	0	0	0	0	0	24.6	1	4.09	0	130	0	13.55	1	9.83	1	2.85	0	369	1	150	1	68	1	31.6
590	3	0	0	58	0	1	0	0	6	1	0	0	1	1	3	1	1	0	0	1	0	1	2	0	0	0	0	0	0	0	20.9	0	4.98	0	155	0	8.46	0	5.53	0	2.38	0	259	0	33	0	34	0	33
591	3	0	1	47	0	1	0	0	0	0	0	0	1	1	3	1	0	0	1	1	0	0	0	0	0	0	0	0	0	0	24.8	1	4.23	0	130	0	5.35	0	3.82	0	1.11	0	201	0	281	1	87	1	56.3
592	3	0	0	69	1	1	0	0	0	0	0	0	1	1	3	1	0	0	0	1	0	0	0	0	0	1	0	0	0	0	20.6	0	3.45	1	103	1	8.78	0	7.75	1	0.83	0	196	0	20	0	13	0	33.7
593	3	0	1	47	0	1	0	0	2	1	0	0	1	1	3	1	0	0	1	0	0	0	0	0	0	0	1	0	0	0	18.1	0	4.48	0	139	0	10.17	1	8.45	1	1.2	0	223	0	12	0	14	0	7.2
594	2	0	0	62	0	1	0	0	2	1	0	0	1	1	3	1	0	0	0	1	0	1	3	0	0	0	0	0	1	1	26.3	1	3.86	0	130	0	7.3	0	3.9	0	2.62	0	252	0	23	0	19	0	12.3
595	3		1	82	1	1	0	0	0	0	0	0	2		3	1	0	0	0	0	0	1	3	1	1	0	0	0	0	0	22.5	0	3.72	0	118	1	6.41	0	3.89	0	2.29	0	257	0	32	0	28	0	6.7
596	3	1	1	63	0	1	0	0	6	1	0	0	1	1	3	1	0	0	0	1	0	1	2	0	0	0	0	0	0	0			3.25	1	95	1	5.74	0	3.7	0	1.25	0	264	0	76	1	44	1	72.4
597	3	0	0	72	1	1	0	0	2	1	0	0	1	1	3	1	0	0	1	0	0	1		0	0	0	0	0	1	1	18.5	0	3.52	0	112	1	8.92	0	7.64	1	0.81	0	92	0	10	0	14	0	27.7
598	4	0	0	77	1	1	0	0	2	1	0	0	1	1	3	1	0	0	0	0	1	0	0	1	0	0	0	0	0	0	19.8	0	2.43	1	78	1	8.02	0	6.42	0	1.16	0	136	0	26	0	34	0	9
599	3	0	0	42	0	1	1	1	0	0	0	0	0	0	3	1	0	0	0	1	0	0	0	0	0	0	0	0	1	1	21.7	0	4.26	0	133	0	5.23	0	3.37	0	1.41	0	243	0	251	1	145	1	503.4
600	1	0	0	43	0	1	0	0	0	0	0	0	0	0	3	1	0	0	1	0	1	0	0	1	0	0	0	0	1	1	27.3	1	4.47	0	126	0	9.38	0	6.51	0	2.29	0	342	1	145	1	40	0	115.1
601	3	0	0	83	1	1	1	1	0	0	0	0	1	1	3	1	0	0	0	1	0	0	0	1	1	0	0	0	0	0	23.1	0	4.14	0	140	0	5.19	0	3.63	0	1.07	0	221	0	102	1	57	1	66.4
602			0	52	0	1	2	1	0	0	0	0	1	1	3	1	0	0	0	1	0	1	3	1	0	0	0	0	0	0	22.2	0	2.77	1	79	1	17.99	1	15.61	1	1.69	0	609	1	71	1	61	1	133.3
603	2	0	1	61	0	1	0	0	0	0	0	0	0	0	3	1	0	0	0	1	0	0	0	0	1	0	1	0	0	0	24.9	1	2.59	1	79	1	9.45	0	7.97	1	0.92	0	272	0	154	1	174	1	138.2
604	3	0	0	59	0	1	0	0	0	0	0	0	2		3	1	0	0	0	1	0	1	3	0	0	0	0	0	1	0	21.6	0	3.99	0	128	0	4.29	0	2.87	0	0.94	0	267	0	187	1	119	1	268.5
605	4	0	1	56	0	1	0	0	0	0	0	0	1	1	3	1	0	0	1	1	0	1	5	1	1	1	0	0	0	0	25.6	1	3.36	1	103	1	4.62	0	2.8	0	1.34	0	164	0	19	0	29	0	64.8
606	2	0	0	49	0	1	0	0	2	1	0	0	0	0	3	1	0	0	1	0	0	0	0	0	0	0	0	0	1	1	22.9	0	4.56	0	138	0	6.05	0	3.93	0	1.49	0	183	0	17	0	15	0	13.9
607	3	0	1	58	0	1	0	0	6	1	1	1	1	1	3	1	0	0	1	0	0	0	0	0	0	0	1	0	0	0	22.9	0	4.66	0	136	0	4.56	0	3.09	0	1.19	0	182	0	45	1	36	0	11.3
608	3	0	1	71	1	1	0	0	0	0	0	0	1	1	3	1	0	0	1	0	0	1	2	0	1	0	0	0	0	0	24.1	1	3.3	1	106	1	10.8	1	9.14	1	1.21	0	139	0	17	0	18	0	5.7
609	4	0	0	66	1	1	2	1	2	1	0	0	1	1	3	1	0	1	0	0	0	0	0	0	0	0	0	0	0	0	18.9	0	4.25	0	119	1	3.98	0	2.31	0	1.31	0	92	0	11	0	14	0	28.7
610	4	0	0	62	0	1	1	1	2	1	0	0	1	1	3	1	0	0	1	1	0	0	0	0	0	0	0	0	0	0			4.09	0	122	0	5.5	0	3.71	0	0.96	0	176	0	72	1	40	0	8.8
611	3	0	0	83	1	1	2	1	6	1	2	1	1	1	3	1	0	0	1	0	0	1	5	1	1	0	0	0	1	1	28.7	1	4.75	0	144	0	6.6	0	4.22	0	2.07	0	113	0	13	0	12	0	7.9
612	4	0	1	64	0	1	1	1	5	1	0	0	1	1	3	1	0	0	1	0	0	0	0	1	0	0	0	0	0	0			2.92	1	74	1	6.15	0	5.41	0	0.35	0	229	0	17	0	48	1	37.5
613	4	0	0	46	0	1	0	0	0	0	0	0	1	1	3	1	0	0	1	0	0	1	5	0	0	0	0	0	1	1	22.5	0	4	0	130	0	4.48	0	2.13	0	1.95	0	133	0	25	0	19	0	17.8
614		0	0	48	0	1	3	1	2	1	0	0	1	1	3	1	0	0	1	0	0	1	20	1	1	0	0	0	0	1	25.9	1													40	0	24	0	14.6
615	4		0	52	0	1	1	1	4	1	4	1	1	1	3	1	0	0	1	0	0	1	10	0	0	0	1	0	1	1	21.1	0	5.69	0	168	0	4.72	0	2.96	0	1.19	0	116	0	96	1	50	1	21
616	3	0	0	51	0	1	1	1	5	1	0	0	1	1	3	1	0	0	1	0	0	1	2	0	0	0	0	0	0	0	26.6	1	4.71	0	143	0	5.08	0	3.09	0	1.51	0	187	0	28	0	26	0	9
617	4	0	0	46	0	1	2	1	0	0	0	0	1	1	3	1	0	0	1	0	0	0	0	1	0	0	1	0	0	0	22	0	5.17	0	157	0	8.02	0	5.64	0	1.87	0	206	0	14	0	18	0	11.2
618	4		0	73	1	1	1	1	2	1	0	0	1	1	3	1	0	0	1	0	0	1	15	1	1	0	0	0	1	1	19.1	0	4.95	0	150	0	7.02	0	5.34	0	1.02	0	123	0	15	0	20	0	16.8
619	3	0	0	67	1	1	1	1	6	1	0	0	1	1	3	1	0	0	1	0	0	1	2	1	0	0	0	0	0	0	23.1	0	4.5	0	148	0	5.59	0	3.3	0	1.92	0	198	0	13	0	18	0	15.1
620	3	0	1	62	0	1	0	0	0	0	0	0	2		3	1	1	0	1	1	1	1	4	0	1	0	1	0	0	0	23.8	0	3.55	0	117	1	4.51	0	2.02	0	2.25	0	235	0	197	1	50	1	23.9
621	4		0	41	0	1	1	1	0	0	0	0	1	1	3	1	0	0	1	0	0	0	0	0	0	0	0	0	0	0	20.6	0	5.19	0	157	0	9.24	0	7.14	0	1.21	0	264	0	48	1	40	0	13.9
622	2	0	0	62	0	1	1	1	0	0	0	0	0	0	3	1	0	0	0	1	0	1	2	0	0	0	0	0	0	0	25.3	1	4.43	0	146	0	4.87	0	2.64	0	1.81	0	178	0	30	0	32	0	115.2
623	4	0	0	52	0	1	2	1	0	0	0	0	1	1	3	1	1	0	1	0	0	0	0	0	0	0	0	0	0	0	19.3	0	3.47	1	111	1	1.78	0	0.82	0	0.75	0	53	0	60	1	51	1	9.5
624	3		0	37	0	1	0	0	0	0	3	1	1	1	3	1	0	0	0	1	0	0	0	0	0	0	0	0	0	0	24.8	1	4.62	0	141	0	8.57	0	4.36	0	3.25	0	335	1	89	1	53	1	110.2
625	3	0	1	69	1	1	0	0	0	0	0	0	1	1	3	1	0	0	1	0	0	1	2	1	0	0	0	0	1	0	24.8	1	4.03	0	116	1	5.88	0	3.7	0	1.9	0	163	0	11	0	16	0	7
626	4	0	0	60	0	1	0	0	0	0	0	0	1	1	3	1	1	0	0	1	0	0	0	0	1	0	0	0	0	0	23	0	3.55	0	110	1	7.17	0	3.86	0	2.45	0	435	1	438	1	238	1	188.1
627	4	0	0	72	1	1	2	1	0	0	2	1	1	1	3	1	0	0	1	0	0	0	0	0	0	0	0	0	0	0	25.7	1	4.74	0	139	0	9.26	0	6.4	0	2.03	0	245	0	19	0	21	0	5.1
628	4	0	1	48	0	1	1	1	0	0	0	0	1	1	3	1	0	0	1	0	0	0	0	0	0	0	0	0	0	0	20.1	0	4.16	0	123	0	10.22	1	8.16	1	0.68	0	234	0	11	0	17	0	9.9
629	2	0	0	55	0	1	1	1	0	0	0	0	1	1	3	1	0	0	0	1	0	1	2	0	0	0	0	0	0	0	22	0	4.52	0	139	0	3.25	0	1.93	0	0.96	0	154	0	159	1	62	1	419.5
630	3	1	0	47	0	1	0	0	6	1	0	0	1	1	3	1	0	0	1	0	0	0	0	0	0	0	0	0	1	1	21.5	0	4.65	0	148	0	7.76	0	6.44	0	0.88	0	109	0	81	1	30	0	10
631	3	0	0	66	1	1	1	1	2	1	0	0	1	1	3	1	0	0	0	1	0	1	2	0	1	0	0	0	1	0	19.8	0	4.05	0	126	0	6.39	0	3.77	0	2.25	0	265	0	55	1	43	1	102.6
632	4	0	0	51	0	1	1	1	2	1	0	0	1	1	3	1	0	1	0	0	0	0	0	0	0	0	1	0	0	1	24.4	1	4.63	0	144	0	8.47	0	6.85	0	1.05	0	128	0	15	0	18	0	11.9
633	3	0	0	60	0	1	1	1	2	1	0	0	1	1	3	1	0	0	1	1	0	1	2	0	0	0	0	0	0	0	22.5	0	3.68	0	117	1	6.3	0	4.52	0	1.22	0	333	1	170	1	152	1	220.9
634	3	1	0	67	1	1	1	1	0	0	0	0	1	1	3	1	0	0	1	0	0	0	0	0	0	0	0	0	1	0	22.4	0	5.1	0	153	0	4.61	0	2.98	0	1.31	0	131	0	25	0	23	0	5.6
635	3		0	65	1	1	1	1	6	1	0	0	1	1	3	1	0	0	0	0	0	1	5	1	0	0	0	0	1	1	20.8	0	4.09	0	125	0	3.4	0	1.72	0	1.33	0	311	1	379	1	168	1	77.5
636	3	0	0	43	0	1	0	0	0	0	0	0	1	1	3	1	0	0	1	0	0	1	5	0	0	0	0	0	1	0	21.5	0	5.17	0	152	0	4.81	0	2.23	0	1.78	0	213	0	27	0	21	0	4.2
637	4	0	0	64	0	1	2	1	2	1	0	0	1	1	3	1	0	0	1	0	0	1	5	0	0	0	1	0	0	0	23.4	0	4.82	0	141	0	7.6	0	5.44	0	1.23	0	229	0	11	0	33	0	15.6
638	4		0	50	0	1	1	1	2	1	0	0	2		3	1	0	0	1	0	0	1	10	0	0	0	0	0	1	1	24.2	1	4.45	0	129	0	4.7	0	3.28	0	0.95	0	119	0	12	0	14	0	11.8
639	3	0	1	46	0	1	1	1	0	0	0	0	1	1	0	1	0	0	1	0	0	0	0	0	0	0	0	0	0	0	21.3	0	3.59	0	100	1	4.22	0	2.42	0	1.38	0	101	0	9	0	10	0	7.57
640	3	0	1	90	1	1	3	1	0	0	0	0	1	1	0	1	0	0	0	1	0	0	0	1	1	0	0	0	0	0	21.1	0	3.32	1	107	1	8.24	0	6.69	0	0.69	0	156	0	87	1	63	1	154.6
641	3	0	0	58	0	1	1	1	0	0	0	0	2		0	1	0	0	1	0	0	0	0	1	1	0	1	0	1	1	24.5	1	4.83	0	154	0	6.36	0	4.83	0	1.01	0	131	0	13	0	23	0	11.5
642	3		1	70	1	1	0	0	6	1	0	0	1	1	0	1	0	0	0	0	0	1	10	1	1	0	0	0	0	1	23.8	0													7	0	16	0	10.9
643	3	0	1	61	0	1	1	1	0	0	0	0	1	1	0	1	0	0	0	1	1	1	4	0	0	0	1	0	0	0			4.24	0	124	0	6.39	0	4.72	0	1.13	0	160	0	46	1	50	1	344.3
644	4	0	0	61	0	1	1	1	2	1	0	0	1	1	0	1	0	0	1	0	0	1	10	0	0	0	0	0	0	0	18.6	0
645	3	0	1	69	1	1	1	1	4	1	0	0	1	1	3	1	0	0	0	1	0	1	2	0	0	1	0	0	0	0	20.8	0	3.84	0	123	0	5.07	0	2.8	0	1.98	0	195	0	48	1	59	1	15.1
646	3	0	0	43	0	1	0	0	2	1	0	0	0	0	3	1	0	0	1	0	0	1	8	0	0	0	0	0	0	0	25.1	1	4.99	0	149	0	4.79	0	3.33	0	0.92	0	89	0	51	1	30	0	20.2
647	3	0	0	55	0	1	1	1	2	1	0	0	1	1	3	1	0	0	1	0	0	1	2	0	0	1	0	0	1	0	24.8	1	5.19	0	167	0	6.3	0	4.11	0	1.78	0	176	0	537	1	206	1	139.7
648	4		1	54	0	1	2	1	0	0	3	1	1	1	3	1	0	0	1	0	0	1	10	0	0	0	0	0	0	0	21.9	0
649	3		0	62	0	1	0	0	0	0	0	0	1	1	3	1	0	1	0	0	0	0	0	0	0	0	0	0	1	0	22.5	0	4.18	0	130	0	7.07	0	3.96	0	2.34	0	177	0	12	0	13	0	5.9
650	3	0	1	74	1	1	0	0	0	0	0	0	2		3	1	0	0	1	0	1	0	0	0	0	0	0	0	0	0	22.5	0	3.51	0	101	1	5.24	0	2.98	0	1.73	0	212	0	10	0	15	0	7.3
651	4	0	1	69	1	1	0	0	0	0	0	0	1	1	3	1	0	0	1	1	0	1	5	0	0	0	0	0	0	0	24.7	1	4.07	0	102	1	6.69	0	6.04	0	0.37	0	202	0	110	1	185	1	71.6
652	2	1	0	57	0	1	1	1	0	0	0	0	0	0	3	1	0	0	1	0	0	0	0	1	1	0	1	1	1	0	23.1	0
653	4	0	0	55	0	1	1	1	6	1	0	0	1	1	2	1	0	0	1	0	0	1	5	0	0	0	0	0	0	0	21.5	0	4.39	0	138	0	8.96	0	7.49	0	0.91	0	334	1	14	0	11	0	4.5
654	4		0	46	0	1	1	1	0	0	0	0	1	1	3	1	0	0	1	0	0	1	2	0	0	0	0	0	0	0	26	1	5.12	0	149	0	7.13	0	4.8	0	1.84	0	211	0	27	0	26	0	16.2
655	2		0	58	0	1	1	1	0	0	0	0	1	1	1	0	0							0	0	0	1	0	1	1	26	1	4.84	0	161	0	8.69	0	6.13	0	1.94	0	132	0	25	0	26	0	7.09
656	4		0	70	1	1	2	1	0	0	0	0	1	1	2	1	0	0	1	0	0	0	0	0	1	0	0	0	0	0	24.8	1	4.81	0	145	0	7.72	0	5	0	1.81	0	162	0	83	1	67	1	31.7
657	3	0	1	64	0	1	1	1	6	1	0	0	1	1	1	0	0	0	1	0	0	1	5	0	0	0	0	0	1	0	17.9	0	4.41	0	147	0	5.57	0	3.63	0	1.6	0	171	0	418	1	316	1	45.3
658	1		0	59	0	1	2	1	0	0	0	0	1	1	1	0	0	0	0	0	0	1	5	1	0	0	0	0	1	0	23.7	0	3.6	0	123	0	9.51	0	5.19	0	3.44	0	302	1	484	1	172	1	30.2
659	2	1	1	60	0	1	0	0	2	1	0	0	1	1	1	0	0	0	1	0	1	0	0	0	0	0	0	0	1	1	31.6	1	3.9	0	119	1	6.22	0	3.57	0	2.09	0	229	0	10	0	16	0	6.7
660	1		0	72	1	1	1	1	0	0	0	0	1	1	1	0	0	0	0	1	1	1	5	0	0	0	0	0	0	1	25.2	1	4.12	0	134	0	6.9	0	5.29	0	1.14	0	146	0	76	1	78	1	807.3
661	3	0	0	43	0	1	1	1	0	0	0	0	1	1	1	0	0	0	1	0	0	0	0	0	0	0	0	0	0	0			4.35	0	125	0	6.76	0	3.82	0	2.44	0	259	0	27	0	21	0	14.5
662	3	0	1	66	1	1	1	1	0	0	0	0	1	1	2	1	0							0	1	0	0	0	0	0	17.1	0	4.28	0	134	0	5.28	0	3.04	0	1.86	0	127	0	149	1	135	1	237.3
663	4	0	1	49	0	1	2	1	6	1	0	0	1	1	1	0	0	0	1	1	0	0	0	0	0	0	0	0	0	0	22.6	0	4.36	0	138	0	7	0	5.6	0	1.3	0	200	0	18	0	18	0	13.8
664	4	0	1	59	0	1	1	1	6	1	0	0	1	1	2	1	0	0	1	0	0	0	0	1	0	0	0	0	0	0	23.6	0	4.2	0	119	1	5.96	0	4.49	0	1	0	146	0	13	0	15	0	12.7
665	2	1	1	49	0	1	1	1	0	0	0	0	1	1	2	1	0	0	1	1	0	0	0	0	0	0	0	0	0	0	20.7	0	3.74	0	116	1	4.77	0	3.23	0	0.97	0	178	0	79	1	32	0	59.3
666	1	1	0	58	0	1	3	1	0	0	0	0	1	1	2	1	0	0	0	1	0	0	0	0	0	0	0	0	0	0	21.2	0
667	3	0	0	56	0	1	0	0	6	1	0	0	1	1	2	1	0	0	1	1	0	0	0	0	0	0	0	0	0	0	23.2	0	4.22	0	132	0	4.11	0	2.59	0	0.94	0	223	0	291	1	154	1	70
668	3	0	1	51	0	1	1	1	0	0	0	0	2		2	1	0	0	0	1	0	0	0	0	0	0	0	0	0	0			4.5	0	143	0	3.73	0	2.28	0	1.18	0	212	0	43	1	19	0	49.3
669	4	0	0	65	1	1	1	1	0	0	0	0	2		2	1	0	0	1	0	0	1	5	1	1	1	0	0			26.1	1
670	2		1	65	1	1	0	0	2	1	0	0	1	1	2	1	0	0	1	0	0	1	3	0	1	0	0	0	0	0	26.4	1	4.21	0	135	0	6.06	0	3.47	0	1.87	0	175	0	16	0	16	0	6.3
671	3	0	0	67	1	1	0	0	2	1	0	0	1	1	2	1	0	0	1	0	0	1	5	0	0	1	0	0	1	1	23.1	0	4.48	0	135	0	5.81	0	4.24	0	1.33	0	218	0	17	0	16	0	26.6
672	3	0	1	60	0	1	0	0	0	0	0	0	1	1	2	1	0	0	1	0	0	1	5	0	0	0	0	0	0	0	21.5	0	4.22	0	126	0	3.92	0	2.02	0	1.48	0	104	0	10	0	16	0	9.8
673	4	0	1	59	0	1	1	1	0	0	0	0	2		3	1	0	1	0	0	0	0	0	1	1	0	1	0	1	1	24.9	1	5.07	0	161	0	5.72	0	3.88	0	1.24	0	127	0	9	0	11	0	10.9
674	4	0	0	63	0	1	2	1	0	0	0	0	2		3	1	0	0	1	0	0	0	0	0	1	0	0	0	0	0	31.6	1	4.43	0	129	0	8.2	0	4.37	0	3.03	0	231	0	18	0	22	0	6.8
675	4	0	0	76	1	1	2	1	2	1	0	0	1	1	0	1	0	1	0	0	0	0	0	0	0	0	0	0	0	0	16.1	0	4.81	0	145	0	7.72	0	5	0	1.81	0	162	0	40	0	51	1	3.9
676	3	0	0	47	0	1	1	1	2	1	0	0	1	1	2	1	0	0	1	0	0	0	0	1	0	1	0	0	1	0	23.5	0	5.23	0	158	0	4.89	0	3.05	0	1.51	0	98	0	38	0	20	0	13.5
677	4	0	0	60	0	1	0	0	0	0	0	0	1	1	3	1	0	0	1	0	0	0	0	0	1	0	0	0	1	1	23.5	0	4.21	0	127	0	3.9	0	2.08	0	1.43	0	143	0	12	0	11	0	5.7
678	4	0	0	58	0	1	0	0	6	1	0	0	1	1	2	1	0	0	1	0	0	0	0	0	0	0	0	0	0	0	20.9	0	4.56	0	138	0	4.66	0	2.85	0	1.3	0	68	0	25	0	25	0	7.7
679	2	0	0	59	0	1	0	0	0	0	0	0	1	1	2	1	0	1	0	0	0	0	0	1	0	1	0	0	1	0	22	0	4.64	0	145	0	6.7	0	3.47	0	2.66	0	234	0	8	0	10	0	7
680		0	0	57	0	0	1	1	0	0	0	0	1	1	2	1	0	0	1	0	0	0	0	1	0	1	0	0	0	0
681	3	0	0	66	1	1	0	0	6	1	0	0	1	1	2	1	0	0	1	0	0	1	3	0	0	0	0	0	1	0			4.49	0	151	0	7.36	0	4.8	0	2.17	0	123	0	17	0	16	0	10.5
682	1	1	1	56	0	0	1	1	0	0	0	0	2		3	1	0	0	1	1	0	1	6	0	0	0	0	0	0	0	22.3	0	4.4	0	131	0	6.8	0	4.57	0	1.59	0	219	0	13	0	15	0	12.9
683	3	0	1	67	1	1	1	1	0	0	0	0	1	1	3	1	0	0	1	1	0	0	0	1	1	0	0	0	0	0	29.5	1	3.77	0	115	1	7.29	0	5.29	0	1.58	0	214	0	99	1	78	1	248.9
684	4	0	0	57	0	1	2	1	6	1	0	0	1	1	2	1	0	0	1	0	1	1	6	0	1	0	0	0	1	1	21	0	5.31	0	156	0	5.01	0	3.46	0	0.93	0	113	0	13	0	13	0	11
685	3		1	79	1	1	0	0	2	1	0	0	1	1	3	1	0	0	1	1	1	0	0	0	1	0	0	0	0	0	28.7	1	4.01	0	124	0	6.32	0	4.39	0	1.21	0	241	0	149	1	103	1	393.7
686	4		1	42	0	1	1	1	0	0	0	0	1	1	3	1	0	0	1	1	0	0	0	0	0	0	0	0	1	0	19.7	0
687	4	0	0	71	1	1	0	0	2	1	0	0	1	1	3	1	0	0	0	0	1	0	0	0	0	0	0	0	0	0	27	1	4.42	0	145	0	8.67	0	6.71	0	1.54	0	252	0	17	0	20	0	15
688	4	0	0	54	0	1	2	1	0	0	0	0	1	1	3	1	0	0	1	0	0	0	0	0	0	0	0	0	0	0	26.8	1	4.16	0	133	0	6.46	0	3.71	0	2.03	0	302	1	30	0	21	0	18.8
689	4	0	1	74	1	1	2	1	4	1	0	0	2		3	1	0	0	1	0	0	0	0	1	0	0	0	0	0	0	20.3	0	3.84	0	116	1	9.43	0	3.4	0	5.02	1	229	0	10	0	14	0	6.4
690	2	1	0	54	0	0	1	1	0	0	0	0	2		3	1	0	0	1	0	0	1	10	0	0	0	0	0	1	1	21.4	0
691	4	0	1	56	0	1	1	1	0	0	0	0	0	0	3	1	0	0	1	0	0	1	3	1	0	0	0	0	0	0	25.1	1	4.76	0	137	0	5.53	0	4.08	0	1.17	0	151	0	21	0	19	0	17.6
692	1	1	1	49	0	1	0	0	0	0	0	0	0	0	3	1	0	0	1	0	0	1	5	0	0	0	0	0	0	0	19	0	4.14	0	118	1	3.51	0	2.32	0	0.77	0	102	0	53	1	29	0	8.8
693	3		0	68	1	1	2	1	0	0	0	0	1	1	3	1	0	0	1	0	1	0	0	0	0	0	0	0	1	1	23.3	0	4.6	0	141	0	6.25	0	4.11	0	1.8	0	171	0	13	0	16	0	28.7
694	2	0	1	73	1	1	0	0	0	0	0	0	1	1	3	1	0	0	1	0	1	0	0	1	1	0	0	0	0	0	21.3	0	3.8	0	110	1	4.99	0	2.45	0	1.96	0	145	0	14	0	21	0	6.8
695	4	0	1	57	0	1	1	1	0	0	0	0	1	1	1	0	0	0	1	0	0	1	5	0	0	0	0	0	1	1	24.6	1	4.39	0	138	0	8.96	0	7.49	0	0.91	0	334	1	42	1	47	1	13.4
696	4	0	0	55	0	1	1	1	6	1	0	0	1	1	3	1	0	0	1	1	0	1	10	0	0	0	0	0	1	1	17.6	0	3.62	0	116	1	6.74	0	4.48	0	1.3	0	189	0	43	1	47	1	176.7
697	4	0	1	45	0	1	1	1	6	1	0	0	1	1	3	1	0	0	1	1	1	0	0	0	0	0	0	0	0	0	28.2	1	5.11	0	151	0	4.21	0	2.21	0	1.49	0	219	0	74	1	36	0	12.4
698	3		0	74	1	1	0	0	0	0	0	0	1	1	3	1	0	0	0	1	0	0	0	0	0	0	0	0	0	0	20.8	0	3.81	0	122	0	4.73	0	2.65	0	1.34	0	185	0	72	1	60	1	351.5
699	3		1	55	0	1	1	1	0	0	0	0	1	1	3	1	0	0	1	0	1	0	0	0	0	0	0	0	0	0	20.6	0	4.65	0	134	0	4.96	0	2.02	0	2.58	0	182	0	362	1	268	1	88.4
700	3	0	0	71	1	1	0	0	0	0	0	0	1	1	3	1	0	0	1	1	1	0	0	0	0	0	0	0	0	0	16.9	0	4.54	0	140	0	10.27	1	7.74	1	2.1	0	221	0	15	0	12	0	14.8
701	3	0	1	39	0	1	0	0	0	0	3	1	1	1	3	1	0	0	1	0	0	0	0	0	0	0	0	0	0	0	25.6	1	3.93	0	123	0	4.11	0	2.19	0	1.56	0	157	0	13	0	18	0	6.4
702	3	0	1	43	0	1	1	1	6	1	0	0	2		3	1	0	1	0	0	0	0	0	1	0	0	0	0	0	0	18.4	0	3.63	0	70	1	3.57	0	2.24	0	1.14	0	249	0	14	0	13	0	3.9
703	3	0	0	53	0	1	0	0	4	1	0	0	1	1	3	1	0	0	1	0	0	0	0	0	0	0	0	0	0	1	24.2	1	4.46	0	134	0	4.01	0	2.39	0	1.39	0	117	0	10	0	13	0	7.6
704	4		1	59	0	1	1	1	1	1	0	0	1	1	0	1	0	0	1	0	0	1	10	0	0	0	0	0	0	0	21.2	0	4.05	0	113	1	15.82	1	12.13	1	0.79	0	189	0	22	0	50	1	11.4
705	3	0	0	70	1	1	2	1	0	0	0	0	1	1	3	1	0	0	1	0	0	0	0	0	0	0	0	0	0	0	22.1	0	4.41	0	141	0	4.57	0	2.75	0	1.39	0	66	0	95	1	57	1	24.7
706	3	0	0	48	0	1	1	1	0	0	0	0	1	1	3	1	0	0	1	1	0	0	0	0	0	0	0	0			22.9	0	4.07	0	117	1	8.11	0	5.87	0	1.24	0	323	1	167	1	172	1	632.3
707	3	0	1	78	1	1	1	1	0	0	0	0	2		3	1	1	0	1	1	0	0	0	0	1	0	0	0	0	0			3.3	1	110	1	4.88	0	3.77	0	0.79	0	235	0	207	1	161	1	169.5
708	3	0	0	34	0	1	0	0	2	1	0	0	2		3	1	0	0	1	0	0	1	10	0	0	0	0	0	1	1	24.2	1	5.02	0	155	0	4.55	0	2.38	0	1.88	0	286	0	41	1	20	0	11.6
709	1	1	1	68	1	1	1	1	2	1	0	0	2		3	1	0	0	1	0	0	1	2	0	0	0	1	0	0	0	21.6	0	3.94	0	127	0	2.73	0	1.09	0	1.31	0	64	0	33	0	34	0	13.2
710	3	0	1	55	0	1	2	1	4	1	0	0	1	1	3	1	0	0	1	0	0	1	8	0	0	0	0	0	1	0	17.3	0	4.07	0	124	0	5.22	0	3.57	0	1.44	0	120	0	14	0	14	0	5.8
711	3	0	1	70	1	1	0	0	5	1	0	0	1	1	3	1	0	0	1	0	0	1	5	0	0	1	1	0	0	0	17.3	0	4.12	0	125	0	4.19	0	2.44	0	1.3	0	207	0	115	1	108	1	42.7
712	4	0	0	52	0	1	1	1	2	1	0	0	2		3	1	0	0	1	0	0	0	0	0	1	0	0	0
713	3	0	0	66	1	1	0	0	2	1	0	0	0	0	3	1	0	0	1	0	1	0	0	0	1	0	0	0	0	0	26.2	1	5.19	0	160	0	6.24	0	3.69	0	2.07	0	170	0	39	0	26	0	10.4
714	3		1	56	0	1	0	0	0	0	0	0	1	1	3	1	0	0	1	0	0	0	0	0	1	1	0	0	0	0	25.9	1	4.31	0	131	0	6.82	0	3.66	0	2.65	0	193	0	22	0	14	0	6
715	4	0	1	68	1	1	2	1	0	0	0	0	1	1	3	1	0	0	1	1	1	0	0	0	0	0	0	0	0	0	31.6	1	4.43	0	129	0	8.2	0	4.37	0	3.03	0	231	0	35	0	54	1	174.1
716	4	0	0	78	1	1	2	1	1	1	0	0	1	1	3	1	0	0	1	0	0	0	0	0	0	0	0	0	0	0	22	0	4.52	0	142	0	7.74	0	5.3	0	1.95	0	248	0	30	0	25	0	16.4
717	3		0	52	0	1	0	0	6	1	0	0	2		3	1	0	0	1	1	0	1	4	0	0	0	0	0	1	1	29.1	1	3.73	0	107	1	10.35	1	8.74	1	0.98	0	384	1	116	1	183	1	371.4
718	4	0	0	72	1	1	0	0		1	3	1	1	1	3	1	0	0	1	1	0	1	11	1	0	0	0	0	0	0	26.1	1	4.56	0	131	0	7.58	0	6.16	0	0.81	0	303	1	42	1	72	1	296.3
719	4	0	0	72	1	1	2	1	6	1	0	0	0	0	2	1	0	0	1	0	0	0	0	0	0	0	0	0	1	1	22.8	0	4.03	0	124	0	6.22	0	3.23	0	2.26	0	230	0	229	1	241	1	50.8
720	4	0	1	41	0	1	1	1	0	0	0	0	2		3	1	0	0	1	0	0	1	3	0	0	0	1	0	0	0	23.6	0	3.96	0	117	1	6.8	0	4.9	0	0.7	0	342	1	26	0	38	0	14.3
721	4	0	1	48	0	1	1	1	1	1	0	0	1	1	2	1	0	0	1	0	0	1	10	0	0	0	0	0	0	0	27.1	1	3.99	0	118	1	6.31	0	3.55	0	1.98	0	170	0	32	0	37	0	16.4
722	4	0	0	53	0	1	1	1	1	1	0	0	1	1	3	1	0	0	1	0	0	1		0	0	0	0	0	0	0	20	0	4.07	0	124	0	5.22	0	3.57	0	1.44	0	171	0	4	0	17	0	7.5
723	4	0	0	59	0	1	1	1	0	0	0	0	1	1	3	1	0	0	1	0	1	1	5	0	0	0	0	0	1	1	19.8	0	3.46	1	111	1	7.41	0	5.73	0	1	0	183	0	144	1	75	1	19.5
724	3	0	1	81	1	1	1	1	0	0	0	0	1	1	3	1	0	0	0	0	0	1	2	0	1	0	0	0	0	0	23.7	0	4.13	0	125	0	8.46	0	5.31	0	2.9	0	254	0	13	0	21	0	12.6
725	3		0	62	0	1	0	0	6	1	0	0	0	0	0	1	0	0	1	0	1	1	2	0	0	0	0	0	0	0	21.8	0	5.21	0	137	0	2.9	0	2.1	0	0.6	0	94	0	29	0	21	0	16.1
726	3	0	1	72	1	1	0	0	0	0	0	0	1	1	3	1	0	0	1	0	1	0	0	1	1	0	0	0	0	0	24	1	5.12	0	153	0	6.43	0	4.19	0	1.3	0	128	0	181	1	124	1	93.4
727	4	1	0	45	0	1	3	1	1	1	0	0	1	1	1	0	0	0	1	0	1	1	4	0	0	0	0	0	1	1	27.8	1	4.83	0	149	0	4.21	0	2.73	0	0.94	0	161	0	26	0	30	0	12.5
728	2	0	0	71	1	1	2	1	0	0	2	1	1	1	3	1	0	0	1	0	0	0	0	1	1	0	1	0			21.9	0	4.39	0	138	0	5.02	0	3.58	0	0.82	0	155	0	11	0	15	0	17.6
729	3	0	1	59	0	1	0	0	6	1	0	0	1	1	3	1	0	0	1	0	1	0	0	0	0	0	0	0	0	0	25.8	1	5.26	0	154	0	6.68	0	3.57	0	2.75	0	191	0	27	0	16	0	10.3
730	2		0	52	0	1	1	1	0	0	0	0	1	1	3	1	1	0	1	1	1	1	5	0	0	0	0	0	1	1	24.2	1	3.81	0	125	0	7.74	0	4.25	0	2.92	0	429	1	54	1	40	0	455.6
731	4	0	1	75	1	1	0	0	0	0	0	0	1	1	3	1	0	0	1	1	0	1	10	1	1	0	0	0	0	0	25.8	1	3.19	1	109	1	6.9	0	4.38	0	1.78	0	184	0	86	1	114	1	92
732	3	0	1	60	0	1	0	0	0	0	0	0	1	1	3	1	1	0	1	0	1	1	10	0	0	0	1	0	0	0	21.9	0	4.37	0	132	0	6.96	0	4.27	0	2.53	0	98	0	13	0	19	0	5.2
733	3		0	66	1	1	0	0	0	0	0	0	1	1	2	1	0	0	1	0	0	1	20	0	0	0	0	0	0	0	23.7	0	4.19	0	133	0	5.5	0	3.52	0	1.62	0	194	0	11	0	17	0	3.3
734	4	0	0	48	0	1	0	0	0	0	3	1	1	1	3	1	0	0	1	1	0	1	3	0	1	0	0	0	0	0	21.4	0	5.01	0	157	0	7.9	0	5.33	0	2.15	0	312	1	52	1	48	1	17.9
735	4	0	1	62	0	1	2	1	0	0	0	0	1	1	3	1	0	0	1	0	0	1		0	0	0	0	0	0	0	19.7	0	4.51	0	134	0	6.54	0	4.5	0	1.76	0	195	0	31	0	29	0	9.8
736	3	0	0	77	1	1	1	1	0	0	0	0	0	0	3	1	0	0	1	1	1	1	7	0	0	0	0	0	0	0	20.5	0	3.64	0	108	1	8.28	0	6.65	0	1.1	0	234	0	127	1	128	1	514
737	1	1	0	61	0	1	1	1	0	0	0	0	1	1	1	0	0	1	0	0	0	0	0	0	1	0	1	1	0	0	28.7	1	5.34	0	161	0	6.54	0	4.48	0	1.67	0	187	0	36	0	24	0	17.8
738	3		0	64	0	1	1	1	6	1	0	0	1	1	2	1	0	0	1	1	0	1	5	0	1	0	0	0	1	0	26.1	1	4.53	0	130	0	8.71	0	6.15	0	1.51	0	270	0	16	0	18	0	12.1
739	4		0	60	0	1	0	0	0	0	0	0	1	1	1	0	0	0	1	0	0	1	3	1	0	0	0	0	1	0	22.1	0	4.54	0	142	0	5.45	0	3.66	0	1.35	0	108	0	29	0	17	0	17.4
740	3	0	0	57	0	1	2	1	0	0	0	0	1	1	2	1	0	0	1	0	0	1	10	0	0	0	0	0	1	1	18.5	0	4.47	0	134	0	5.28	0	3.26	0	1.88	0	154	0	15	0	15	0	9.6
741	3		1	78	1	1	0	0	2	1	0	0	1	1	2	1	0	0	1	1	1	0	0	1	1	0	0	0	0	0	22.4	0	3.66	0	112	1	5.73	0	3.89	0	1.36	0	288	0	50	1	43	1	307.7
742	3	0	0	57	0	1	1	1	0	0	0	0	1	1	3	1	0	0	1	1	0	1	5	0	1	0	0	0	1	0	18.9	0	4.51	0	138	0	7.89	0	5.67	0	1.76	0	291	0	322	1	117	1	385
743	3		1	69	1	1	0	0	6	1	0	0	1	1	3	1	1	0	1	0	0	1	10	0	0	1	0	0			23.4	0	4.17	0	127	0	5.12	0	2.8	0	2.03	0	184	0	10	0	14	0	8.7
744	3		1	57	0	1	0	0	2	1	0	0	1	1	3	1	0	0	1	1	0	0	0	0	0	1	0	0	0	0	19.4	0	4.13	0	132	0	3.33	0	1.41	0	1.67	0	152	0	13	0	15	0	9.5
745	3		0	57	0	1	1	1	0	0	0	0	1	1	2	1	0	0	1	0	0	0	0	0	0	0	0	0	1	1			4.26	0	134	0	5.55	0	3.57	0	1.37	0	315	1	11	0	17	0	5.9
746	3		1	67	1	1	0	0	0	0	0	0	1	1	3	1	0	0	1	0	0	1	10	1	0	0	0	0	0	0	21.6	0	3.5	0	111	1	3.8	0	1.58	0	1.03	0	146	0	11	0	13	0	5.1
747	3	0	1	70	1	1	1	1	0	0	1	1	1	1	3	1	0	0	0	0	0	1	2	0	0	0	0	0	0	0	25.1	1	4.5	0	131	0	5.45	0	3.18	0	2.02	0	158	0	38	0	30	0	7.1
748	3	0	0	58	0	1	0	0	0	0	0	0	1	1	2	1	0	0	1	1	0	1	9	0	0	0	0	0	1	1	19.9	0	3.73	0	136	0	10.6	1	9.6	1	0.9	0	265	0	199	1	441	1	276
749	3	0	1	57	0	1	0	0	0	0	3	1	1	1	3	1	0	0	0	1	1	0	0	0	1	0	0	0	0	0	21.8	0	4.75	0	142	0	4.59	0	2.76	0	1.45	0	264	0	106	1	49	1	166.5
750	3		1	67	1	1	0	0	2	1	0	0	1	1	3	1	0	0	1	0	0	0	0	1	1	1	0	0	0	0	27.4	1	4.15	0	125	0	4.94	0	2.54	0	1.94	0	190	0	12	0	12	0	5.3
751	4	0	1	72	1	1	1	1	0	0	0	0	1	1	2	1	0	0	1	0	0	0	0	1	0	1	0	0	0	0	27.2	1	3.98	0	122	0	4.8	0	2.69	0	1.14	0	44	0	13	0	17	0	17.2
752	4		0	60	0	1	2	1	0	0	0	0	1	1	3	1	0	1	0	0	0	0	0	0	0	0	0	0	0	0	28.4	1	5.16	0	154	0	9.11	0	6.42	0	1.38	0	182	0	81	1	78	1	80.4
753	4	0	0	70	1	1	1	1	2	1	0	0	1	1	3	1	0	0	1	0	0	1	10	0	0	0	1	1	0	0	19.5	0													15	0	30	0	27.6
754	2	0	1	70	1	1	0	0	2	1	0	0	0	0	3	1	0	1	0	0	0	0	0	0	0	0	0	0	0	0	22.8	0	4.75	0	136	0	6.36	0	4.05	0	1.72	0	197	0	11	0	17	0	7.2
755	3		0	68	1	1	0	0	0	0	0	0	1	1	3	1	0	0	1	1	1	0	0	0	0	0	0	0	0	0	23.8	0	3.83	0	126	0	9.48	0	5.96	0	2.55	0	307	1	212	1	101	1	235.2
756	3	0	0	52	0	1	0	0	2	1	0	0	1	1	3	1	0	0	1	0	0	1	10	0	0	0	0	0	0	0	27.3	1	4.83	0	147	0	5.57	0	3.53	0	1.61	0	143	0	25	0	24	0	16.8
757	3		0	66	1	1	0	0	0	0	0	0	1	1	2	1	0	0	0	0	0	1	20	1	0	0	0	0	1	0	24.1	1	4.17	0	132	0	4.54	0	2.56	0	1.61	0	208	0
758	3		1	64	0	1	0	0	6	1	0	0	1	1	3	1	0	0	0	1	1	0	0	0	1	0	0	0	0	0	22.7	0	4.61	0	132	0	4.46	0	2.99	0	0.95	0	225	0	225	1	141	1	319.6
759	4		1	60	0	1	1	1	0	0	0	0	0	0	3	1	0	0	1	0	0	1	2	0	0	0	0	0	0	0	26.1	1	4.65	0	145	0	9.4	0	6.2	0	2.7	0	160	0	11	0	15	0	16.8
760	3	1	0	67	1	1	2	1	0	0	1	1	1	1	3	1	0	0	1	0	0	0	0	0	1	0	0	0	1	1	26	1	4.38	0	132	0	7.37	0	4.53	0	2.05	0	170	0	17	0	16	0	8
761	4	0	0	47	0	1	0	0	0	0	0	0	1	1	3	1	0	0	1	0	0	0	0	0	0	0	1	0	0	0	25.5	1	4.8	0	153	0	9.31	0	5.48	0	2.79	0	210	0	17	0	26	0	11.8
762	3	0	0	39	0	1	2	1	0	0	0	0	1	1	2	1	0	0	1	0	0	0	0	0	1	0	0	0	1	1	26.9	1	4.66	0	145	0	7.57	0	4.84	0	2.41	0	229	0	31	0	26	0	6.5
763	3		0	66	1	1	1	1	0	0	3	1	0	0	3	1	0	0	1	1	0	0	0	0	1	0	0	0	0	0	19.6	0	3.5	0	104	1	7.23	0	4.92	0	1.31	0	326	1	74	1	153	1	386.7
764	3	0	1	70	1	1	1	1	0	0	0	0	1	1	3	1	0	0	0	1	0	1	4	1	0	0	0	0	0	0			3.3	1	110	1	8.06	0	6.06	0	0.93	0	172	0	101	1	73	1	357.9
765	3		0	60	0	1	0	0	0	0	0	0	1	1	1	0	0	0	1	1	0	1	10	0	0	0	0	0	0	0	26.3	1	4.49	0	130	0	7.4	0	4.85	0	1.89	0	186	0	72	1	39	0	322.2
766	4	0	1	70	1	1	1	1	0	0	0	0	1	1	0	1	0	0	1	0	1	1	5	0	1	0	1	0	0	0	21.8	0	4.6	0	143	0	6.9	0	5.2	0	1.3	0	172	0	33	0	30	0	11.8
767	3	0	0	63	0	1	0	0	0	0	0	0	1	1	1	0	0	0	1	1	1	1		1	0	0	0	0	0	0	23.7	0	4.92	0	148	0	4.76	0	3.29	0	1.23	0	214	0	161	1	93	1	390.7
768	3		0	64	0	1	0	0	0	0	0	0	1	1	3	1	0	0	0	1	0	0	0	0	0	0	0	0	0	0	19.8	0	3.43	1	115	1	9.3	0	6.61	0	2.03	0	413	1	206	1	166	1	235.6
769	4		0	68	1	1	0	0	6	1	0	0	1	1	2	1	0	0	1	0	0	1		1	0	0	0	0	0	0	21	0	3.82	0	122	0	5.4	0	4.19	0	1.04	0	114	0	55	1	41	1	7
770	3	0	0	56	0	1	0	0	0	0	0	0	1	1	3	1	0	0	1	1	0	1	5	1	0	0	0	0	0	0	21.1	0	4.18	0	125	0	5.08	0	3.1	0	1.42	0	233	0	134	1	57	1	218.1
771	1		0	71	1	1	1	1	2	1	0	0	1	1	2	1	0	0	0	1	1	1	5	0	1	0	0	0	1	1	19.4	0	3.68	0	125	0	8.27	0	3.1	0	3.63	0	270	0	63	1	70	1	260.4
772	3		1	57	0	0	0	0	0	0	0	0	1	1	2	1	0	0	1	0	0	0	0	0	1	0	0	0	0	0	25.8	1											187	0	15	0	18	0	10.6
773	4		0	40	0	1	1	1	0	0	0	0	1	1	3	1	0	0	1	1	0	1	10	0	0	0	0	0			20.7	0	4.58	0	140	0	6.59	0	4.57	0	1.69	0	141	0	375	1	196	1	178.2
774	2	0	0	45	0	1	0	0	0	0	0	0	1	1	3	1	0	0	1	0	0	1	6	0	0	0	0	0	1	0	23.5	0	5.65	0	174	0	10	0	7.59	1	1.72	0	167	0	45	1	25	0	12
775	3	0	0	76	1	1	1	1	0	0	0	0	1	1	2	1	0	0	0	1	0	0	0	0	1	0	0	0	0	0	24.3	1	3.95	0	119	1	6.26	0	3.28	0	2.11	0	299	0	143	1	105	1	538.2
776	3	0	1	75	1	1	0	0	0	0	0	0	0	0	2	1	0	0	0	1	0	0	0	0	1	0	0	0	0	0	20.4	0	3.49	1	108	1	5.87	0	3.54	0	1.88	0	233	0	64	1	64	1	289.3
777	3	0	1	66	1	1	0	0	0	0	0	0	1	1	3	1	0	0	1	0	0	0	0	0	0	0	0	0	0	0	19.8	0	3.87	0	112	1	4.68	0	2.33	0	1.92	0	224	0	14	0	21	0	16.1
778	4	0	0	46	0	1	1	1	1	1	0	0	0	0	3	1	0	0	1	0	1	1	3	0	0	0	0	0	1	1	25.2	1	4.4	0	140	0	11.8	1	9	1	2.5	0	248	0	35	0	28	0	10.7
779	1	0	0	57	0	1	0	0	2	1	0	0	1	1	2	1	0	0	0	1	0	0	0	0	0	0	0	0	1	1	22.4	0	3.75	0	120	0	4.14	0	2.7	0	1	0	250	0	316	1	174	1	143.4
780	3		0	58	0	1	1	1	0	0	0	0	0	0	3	1	0	0	0	1	0	0	0	0	1	0	0	0	0	0	27.4	1	5.05	0	147	0	7.44	0	5.38	0	1.1	0	286	0	771	1	303	1	256.7
781	3	0	1	71	1	1	0	0	0	0	0	0	1	1	1	0	0	0	1	1	0	1	5	0	0	0	0	0	0	0	19	0	2.81	1	90	1	6.68	0	4.83	0	1.05	0	432	1	160	1	143	1	418.3
782	4		0	53	0	1	1	1	2	1	0	0	0	0	3	1	0	0	1	0	0	1	2	0	0	0	0	0	0	1	23.2	0	5.13	0	165	0	7.4	0	5.8	0	1.4	0	121	0
783	3		0	68	1	1	1	1	0	0	0	0	1	1	2	1	0	0	1	0	0	0	0	1	0	0	0	0	1	0	23.2	0	4.59	0	144	0	5.84	0	3.09	0	2.13	0	154	0	18	0	21	0	8.9
784	3		0	41	0	1	1	1	0	0	0	0	1	1	3	1	0	0	1	1	1	0	0	0	1	0	0	0	1	1	24.2	1	4.53	0	143	0	5.72	0	3.88	0	1.22	0	391	1	88	1	73	1	492
785	4	0	0	53	0	1	0	0	4	1	0	0	1	1	2	1	0	0	1	0	0	1	5	0	0	0	0	0	1	1	22.8	0	4.03	0	124	0	6.22	0	3.23	0	2.26	0	230	0	17	0	15	0	9.8
786	3		1	56	0	1	0	0	0	0	0	0	1	1	2	1	0	0	1	0	1	0	0	0	0	0	0	0	0	0	22.7	0													9	0	18	0	5
787	4		1	63	0	1	2	1	6	1	0	0	0	0	2	1	0	0	1	0	0	0	0	0	0	0	0	0	0	0	24.1	1	4.72	0	137	0	4.41	0	2.72	0	1.27	0	166	0	19	0	21	0	11.11
788	3		0	51	0	1	1	1	5	1	0	0	1	1	2	1	0	0	0	1	0	1		0	0	0	0	0	0	0	20.7	0	3.85	0	119	1	5.18	0	3.53	0	1.59	0	261	0	184	1	207	1	449
789	1	0	0	70	1	0	1	1	0	0	0	0	0	0	2	1	0	0	0	1	0	1	15	0	0	0	0	0	1	1	21	0	3.25	1	101	1	4.45	0	2.89	0	0.72	0	215	0	40	0	30	0	390.2
790	3	0	1	51	0	1	0	0	0	0	0	0	0	0	3	1	0	0	1	0	1	1	5	0	0	0	0	0	0	0	26	1	4.7	0	139	0	5.57	0	4.01	0	1.17	0	176	0	293	1	156	1	42.8
791	4	0	1	57	0	1	0	0	0	0	0	0	1	1	2	1	0	0	1	0	0	0	0	0	0	0	0	0	1	1	25.8	1	4.49	0	105	1	5.94	0	3.63	0	1.92	0	247	0	7	0	14	0	8.2
792	3	0	0	54	0	1	1	1	6	1	0	0	0	0	3	1	0	0	1	0	0	1	3	0	1	0	0	0	0	0	26.6	1	4.91	0	155	0	7.46	0	3.96	0	2.2	0	185	0	47	1	33	0	9.9
793	3	0	0	58	0	1	1	1	0	0	0	0	0	0	2	1	0	0	1	0	0	1	5	0	0	0	0	0	1	0	22.9	0	4.14	0	126	0	5.18	0	3.11	0	1.45	0	302	1	91	1	72	1	5.9
794	3		0	47	0	1	1	1	0	0	0	0	2		3	1	0	0	1	0	0	0	0	0	0	0	0	0			24.2	1	5	0	153	0	7.42	0	4.67	0	2.23	0	187	0	31	0	24	0	3.6
795	3	0	0	65	1	0	0	0	0	0	0	0	1	1	2	1	0	0	0	1	1	0	0	0	0	0	0	0	0	0	27.3	1	4.59	0	137	0	6.86	0	4.67	0	1.45	0	311	1	243	1	132	1	143
796			0	48	0	1	1	1	0	0	0	0	1	1	3	1	0	0	1	0	0	0	0	0	0	0	0	0	0	0	22.4	0													49	1	44	1	5.7
797	3	0	0	34	0	0	1	1	6	1	0	0	0	0	2	1	0	0	1	0	0	0	0	1	1	0	1	0	1	1	27.7	1	4.87	0	148	0	5.97	0	4.33	0	1.13	0	168	0	223	1	71	1	10.2
798	3	1	0	48	0	0	0	0	6	1	0	0	1	1	1	0	0	0	1	1	0	0	0	0	0	0	0	0	1	1	24	1	4.26	0	133	0	5.28	0	2.73	0	2	0			22	0	18	0	2
799			0	63	0	0	0	0	6	1	0	0	1	1	3	1	0							0	0	0	0	0	0	0	24.5	1
800	1	1	1	37	0	0	0	0	0	0	0	0	1	1	3	1	0	1	0	0	0	0	0	0	0	0	0	0	0	0	29.7	1	4.75	0	142	0	8.09	0	5.44	0	2.28	0	170	0	21	0	14	0	7.1
801	1	0	1	72	1	1	0	0	0	0	0	0	1	1	3	1	1	0	1	0	0	0	0	1	1	0	0	0	0	0	23.4	0	4.41	0	136	0	6.82	0	5.19	0	1.26	0	141	0	19	0	22	0	6.9
802	3	1	1	36	0	0	0	0	0	0	0	0	2		3	1	0	0	0	1	0	1	5	0	0	0	0	0	0	0	23.7	0	4.2	0	121	0	5.86	0	3.41	0	2.05	0	259	0	353	1	253	1	76.5
803	3		0	50	0	0	0	0	0	0	0	0	1	1	3	1	0	0	1	0	0	1	8	0	0	0	0	0	0	0	26.1	1	4.82	0	146	0	7.04	0	3.65	0	2.73	0	261	0	47	1	31	0	9.7
804	2	1	0	52	0	1	1	1	0	0	0	0	1	1	3	1	0							0	0	0	0	0	0	0	22	0
805	3	0	1	55	0	0	0	0	0	0	0	0	1	1	3	1	0	0	1	1	0	0	0	0	1	0	0	0	1	0	24.8	1	4.36	0	133	0	5.01	0	2.94	0	1.59	0	107	0	13	0	20	0	6.4
806	3	0	0	41	0	0	0	0	0	0	0	0	1	1	3	1	0	0	1	0	0	0	0	0	0	0	0	0	0	0	24.4	1	4.04	0	131	0	10.4	1	7.26	0	2.44	0	364	1	478	1	261	1	292.5
807		0	1	67	1	0	1	1	2	1	0	0	0	0	3	1	0	0	1	0	0	0	0	0	1	0	0	0	0	0	22.5	0	3.44	1	109	1	9.4	0	5.6	0	2.4	0	154	0	12	0	18	0	10
808	3	1	0	77	1	0	0	0	0	0	0	0	0	0	1	0	0	0	1	1	0	0	0	0	0	0	0	0	0	0	28.5	1	3.55	0	106	1	11.12	1	9.51	1	0.8	0	147	0	29	0	29	0	11.5
809	3		0	54	0	0	0	0	0	0	0	0	1	1	3	1	0	0	1	1	0	1	6	0	0	0	0	0	0	0	23.1	0	4.32	0	134	0	4.48	0	2.76	0	1.41	0	268	0	95	1	43	1	391
810	3		1	60	0	0	0	0	0	0	0	0	1	1	3	1	0	0	0	1	1	1	6	0	1	0	0	0	0	0	25.5	1	4.54	0	135	0	6.71	0	5.11	0	1.26	0	239	0	220	1	138	1	222.6
811	4		1	54	0	0	0	0	0	0	0	0	1	1	3	1	0	0	1	1	1	1	10	0	0	0	0	0	0	0	26.2	1	3.76	0	106	1	5.71	0	4.42	0	1	0	349	1	197	1	161	1	617.8
812	3	0	0	52	0	0	2	1	0	0	0	0	1	1	3	1	0	0	1	0	0	0	0	0	0	0	0	0	1	1	23.2	0
813	4	0	0	62	0	0	0	0	0	0	0	0	1	1	3	1	0	0	1	0	0	1	5	0	1	0	0	0	1	1	23.1	0	4.26	0	135	0	7.14	0	5.37	0	1.3	0	130	0	22	0	21	0	15.5
814	2	0	1	69	1	0	0	0	0	0	0	0	1	1	1	0	0	0	1	0	0	0	0	1	1	0	0	0	0	0			4.49	0	131	0	6.57	0	3.82	0	1.66	0	162	0	12	0	19	0	7
815	3	0	0	57	0	0	0	0	0	0	0	0	1	1	2	1	0	0	1	0	1	1	5	0	0	0	0	0	1	0	21.5	0	4.9	0	139	0	5.5	0	2.07	0	2.78	0	234	0	339	1	169	1	78.9
816	3	0	1	51	0	0	0	0	0	0	0	0	1	1	3	1	0	0	1	1	0	1	5	0	0	0	0	0	0	0	18.6	0	4.45	0	136	0	7.47	0	4.55	0	2.36	0	195	0	12	0	14	0	8.9
817	4		0	51	0	0	0	0	4	1	0	0	1	1	3	1	0	1	0	0	0	0	0	0	0	0	0	0	0	0	23.8	0	4.37	0	147	0	6.31	0	4.18	0	1.55	0	169	0
818	3		0	55	0	0	0	0	0	0	0	0	1	1	3	1	0	0	1	1	0	0	0	0	0	0	0	0	1	0	21.6	0	4	0	124	0	8.34	0	5.91	0	1.59	0	186	0	300	1	134	1	208.4
819	3		0	55	0	0	0	0	2	1	0	0	0	0	3	1	0	0	0	1	0	0	0	0	0	0	0	0	1	1	28.1	1	4.28	0	131	0	4.62	0	2.8	0	0.84	0	292	0	504	1	217	1	101.1
820	4	0	1	66	1	0	0	0	0	0	0	0	1	1	3	1	0	0	1	0	1	0	0	0	0	0	0	0	0	0	19.5	0	4.63	0	143	0	3.63	0	1.66	0	1.72	0	177	0	144	1	76	1	6.9
821	3		0	60	0	0	1	1	5	1	0	0	1	1	2	1	0	0	0	0	0	1	10	0	0	0	0	0	0	0	24	1	4.21	0	135	0	9.98	0	7.71	1	1.97	0	159	0	30	0	22	0	19.6
822	3	0	0	45	0	0	0	0	6	1	0	0	1	1	1	0	0	0	1	0	0	1	15	0	0	0	1	0	0	0	29.1	1	4.87	0	139	0	4.71	0	3.11	0	1.15	0	102	0	35	0	20	0	14.6
823	3	0	0	64	0	0	0	0	1	1	0	0	1	1	3	1	0	0	0	1	0	0	0	0	1	0	0	0	0	0	26.1	1	4.4	0	136	0	7.28	0	4.44	0	2.36	0	136	0	27	0	30	0	8.6
824	3	0	1	75	1	0	0	0	0	0	0	0	1	1	1	0	0	0	1	0	0	1	15	0	0	0	0	0	0	0	19.5	0	4.23	0	129	0	6.98	0	4.3	0	1.95	0	219	0	13	0	21	0	17.2
825	4	0	0	46	0	0	0	0	6	1	0	0	0	0	3	1	0	0	1	0	0	1	3	0	0	0	0	0	1	0	23.7	0	5.07	0	156	0	9.72	0	7.41	0	1.66	0	156	0	46	1	61	1	9.6
826	3		1	60	0	0	0	0	0	0	0	0	1	1	2	1	0	0	1	1	0	1	6	0	1	0	0	0	0	0	27.3	1	3.35	1	108	1	6.02	0	3.91	0	1.43	0	225	0	123	1	91	1	137.8
827	2	0	1	68	1	0	0	0	0	0	0	0	1	1	1	0	0	0	1	0	0	1	3	1	1	0	0	0	0	0	20	0	3.73	0	117	1	8.48	0	5.37	0	2.53	0	255	0	12	0	13	0	5.3
828	4	0	0	62	0	0	0	0	0	0	0	0	1	1	3	1	0	0	1	1	0	1	3	0	0	0	0	0	0	0	23.1	0	4.59	0	137	0	5.66	0	2.51	0	2.22	0	165	0	19	0	21	0	4.3
829	3	0	1	71	1	0	0	0	0	0	0	0	0	0	3	1	0	0	1	0	0	1	5	1	1	0	0	0	0	0	31.2	1	4.02	0	125	0	4.13	0	2.61	0	1.24	0	136	0	9	0	13	0	3.5
830	4		0	55	0	0	0	0	3	1	0	0	1	1	3	1	0							0	0	0	0	0	0	0	20.7	0	3.63	0	119	1	6	0	4.45	0	0.96	0	254	0	28	0	37	0	9.7
831	4	0	1	52	0	0	1	1	5	1	0	0	0	0	2	1	0	0	1	0	0	0	0	1	0	0	0	0	0	0	27.2	1	4.8	0	136	0	5.3	0	3.7	0	1.4	0	210	0	110	1	66	1	57.2
832	3		0	64	0	0	0	0	2	1	0	0	1	1	3	1	0	0	0	1	0	1	5	1	1	0	0	0	0	0	26.4	1													150	1	49	1	129.8
833	3		0	72	1	0	0	0	0	0	0	0	1	1	1	0	0	0	0	0	0	1	10	1	0	0	0	0	0	0	25.1	1	4.41	0	143	0	7.09	0	4.55	0	2.14	0	180	0	17	0	18	0	8.3
834	3	0	0	54	0	0	0	0	0	0	0	0	1	1	3	1	0	0	1	0	0	1	2.5	0	0	0	0	0	0	0	22.5	0	5.06	0	162	0	6.83	0	3.38	0	2.5	0	196	0	20	0	16	0	11.2
835	4		0	72	1	0	0	0	0	0	0	0	1	1	1	0	0	0	0	0	0	1	6	1	1	0	0	0	0	0	26.8	1	4.31	0	134	0	4.37	0	2.92	0	1.11	0	202	0	8	0	17	0	28.1
836	3	0	0	63	0	0	0	0	0	0	0	0	1	1	3	1	0	0	1	0	0	0	0	1	0	0	0	0	0	0	23.3	0	5.13	0	156	0	8.93	0	5.8	0	2.58	0	167	0	177	1	132	1	47.3
837	4		0	69	1	0	0	0	0	0	0	0	1	1	3	1	0	0	0	1	0	0	0	0	0	0	0	0	0	0	21.4	0	3.88	0	120	0	5.42	0	3.52	0	1.44	0	145	0	720	1	540	1	97.3
838	3	0	0	52	0	0	0	0	0	0	0	0	1	1	1	0	0	0	0	1	0	1	5	1	0	0	0	0	0	0	25.8	1	4.66	0	144	0	4.33	0	2.11	0	1.7	0	208	0	118	1	123	1	281.7
839	3	0	1	43	0	0	0	0	6	1	1	1	0	0	2	1	0	0	0	1	0	0	0	0	0	0	0	0	0	0	21.3	0	3.75	0	111	1	4.58	0	3.26	0	1	0	306	1	242	1	186	1	254.4
840	4		0	59	0	0	0	0	0	0	0	0	1	1	3	1	0	0	1	1	0	1	5	0	0	0	0	0	0	0	21.9	0
841	2		0	63	0	0	0	0	0	0	0	0	1	1	1	0	0	0	1	1	0	0	0	0	0	0	0	0	1	1	23.1	0	3.51	0	112	1	14.46	1	11.97	1	0.91	0	337	1	190	1	516	1	466.6
842	2	0	1	59	0	0	0	0	0	0	0	0	0	0	3	1	0	0	0	1	1	0	0	0	0	0	0	0	0	0	25.3	1	3.81	0	121	0	6.58	0	4.11	0	1.85	0	241	0	259	1	198	1	55.5
843	4	1	0	66	1	0	1	1	6	1	0	0	0	0	1	0	0	0	1	0	0	1	11	0	0	0	0	0	0	0	29.4	1	5.02	0	146	0	5.8	0	3.4	0	1.8	0	155	0	21	0	22	0	14
844	4	0	1	53	0	0	1	1	0	0	0	0	1	1	3	1	0	0	1	0	0	1	5	0	0	0	0	0	0	1	19.7	0	4.23	0	128	0	4.62	0	2.41	0	1.66	0	165	0	22	0	26	0	3.4
845	3		0	71	1	0	0	0	0	0	0	0	1	1	3	1	0	0	1	0	1	1	10	0	0	0	0	0	0	0	21.8	0	4.54	0	147	0	4.85	0	3.13	0	1.37	0	126	0	11	0	13	0	107
846	4		0	77	1	0	0	0	0	0	0	0	0	0	3	1	0	1	0	0	0	0	0	0	0	0	0	0	0	0	29	1	5.69	0	166	0	6.33	0	4.01	0	2.06	0	123	0	25	0	25	0	11.5
847	3	0	0	56	0	0	0	0	0	0	0	0	1	1	3	1	0	0	0	1	0	1	2	0	1	0	0	0	0	0	20.5	0	4.48	0	151	0	4.49	0	3.44	0	0.94	0	302	1	34	0	27	0	243.3
848	4	0	1	62	0	0	2	1	5	1	0	0	1	1	3	1	0	0	1	0	0	0	0	0	0	0	1	0	0	0	21.9	0	4.21	0	128	0	3.46	0	2.37	0	0.93	0	98	0	12	0	21	0	15.9
849	4	0	1	64	0	0	1	1	0	0	0	0	0	0	3	1	0	0	1	0	1	0	0	0	0	0	0	0	0	0			3.27	1	100	1	5.9	0	5.1	0	0.6	0	164	0	30	0	32	0	23.7
850	4	0	0	36	0	0	1	1	6	1	0	0	0	0	2	1	0	0	1	0	0	1	2	0	0	0	0	0	1	0	20.3	0	4.35	0	140	0	4.67	0	2.62	0	1.72	0	184	0	65	1	53	1	15.3
851	4		1	67	1	0	0	0	0	0	0	0	1	1	3	1	0	0	1	0	0	0	0	0	0	0	0	0	0	0	26.2	1	3.75	0	114	1	5.16	0	3.26	0	1.3	0	117	0	14	0	33	0	5.8
852	3		0	62	0	0	0	0	0	0	0	0	1	1	3	1	0	0	1	0	0	0	0	0	0	0	0	0	0	0	26.5	1	4.84	0	154	0	6.18	0	3.85	0	1.64	0	242	0	18	0	30	0	22
853	2	0	0	63	0	0	0	0	2	1	0	0	1	1	2	1	0	0	0	0	0	1	4	0	0	0	0	0	1	0	19.2	0	4.34	0	135	0	4.73	0	3	0	1.32	0	195	0	11	0	14	0	9
854	1	0	0	71	1	0	0	0	2	1	0	0	1	1	3	1	0	0	1	0	1	1	5	1	0	0	0	0	0	0	21.8	0	4.71	0	144	0	6.47	0	3.55	0	2.52	0	184	0	13	0	15	0	13
855	2		1	58	0	0	0	0	2	1	0	0	1	1	2	1	0	0	1	1	1	1	10	1	0	0	0	0	0	0	19.9	0	3.74	0	119	1	6.56	0	4.71	0	1.34	0	156	0	251	1	186	1	131.7
856	1		0	63	0	0	0	0	2	1	0	0	1	1	3	1	0	0	1	0	0	0	0	0	1	0	0	0	0	0	24.6	1	3.33	1	96	1	6.61	0	4.64	0	0.79	0	196	0	10	0	14	0	5.2
857	4		0	58	0	0	0	0	4	1	0	0	1	1	1	0	0	0	1	0	0	0	0	0	0	0	0	0	0	0	24.2	1	4.34	0	129	0	8.56	0	6.72	0	1.06	0	209	0	22	0	20	0	12.2
858	3		1	64	0	0	1	1	0	0	0	0	1	1	3	1	0	0	1	0	1	0	0	1	1	0	1	0	0	0	25.7	1	4.71	0	132	0	7.98	0	4.61	0	2.95	0	383	1	13	0	21	0	7.3
859	4		0	54	0	0	2	1	6	1	0	0	1	1	3	1	0	0	1	0	0	0	0	0	0	0	0	0	0	0	20.3	0	4.78	0	141	0	4	0	2.72	0	0.97	0	142	0	27	0	20	0	10.8
860	3	0	1	50	0	0	0	0	0	0	0	0	1	1	3	1	0	0	0	1	0	0	0	0	0	0	0	0	0	0	32.8	1	4.77	0	139	0	6.41	0	4.47	0	1.57	0	306	1	258	1	226	1	283.7
861	1		1	72	1	0	0	0	2	1	0	0	0	0	3	1	0	0	0	1	0	1	5	0	0	0	0	0	0	0	27.9	1	3.79	0	115	1	5.27	0	2.71	0	2.21	0	178	0	259	1	184	1	116.1
862	3		0	46	0	0	0	0	0	0	0	0	0	0	3	1	0	0	1	0	0	0	0	0	0	0	0	0	0	0	18	0	4.22	0	137	0	5.99	0	4.11	0	1.47	0	180	0	20	0	23	0	11.2
863	2	0	0	69	1	0	0	0	0	0	0	0	1	1	1	0	0	0	1	0	0	0	0	0	0	0	0	0	0	0	18.9	0	4.74	0	149	0	3.73	0	1.55	0	1.82	0	159	0	16	0	22	0	15.8
864	3	0	0	60	0	0	0	0	6	1	0	0	0	0	3	1	0	0	1	0	1	1	11	0	0	0	0	0	0	1	22.3	0	4.84	0	145	0	8.91	0	5.64	0	2.53	0	240	0	8	0	17	0	27.7
865	4	0	1	64	0	0	0	0	0	0	0	0	0	0	3	1	0	0	1	0	0	1	10	1	1	0	0	0	0	0	21	0	4.46	0	131	0	5.5	0	3.21	0	2	0	210	0	16	0	17	0	5.1
866	4	0	0	54	0	0	0	0	2	1	0	0	1	1	3	1	0	0	1	0	0	1	1.5	0	0	0	0	0	0	0	19.5	0	4.23	0	127	0	6.2	0	3.95	0	1.67	0	212	0	30	0	21	0	7.6
867	3	0	0	69	1	0	0	0	0	0	0	0	1	1	3	1	0	0	1	1	0	1	20	0	0	0	0	0	0	0	21.2	0	4.56	0	131	0	6.66	0	4.08	0	1.57	0	188	0	16	0	21	0	11.6
868	4		0	74	1	1	1	1	0	0	0	0	1	1	3	1	0	0	1	0	0	0	0	0	1	0	0	0	0	0	22.1	0	4.01	0	126	0	3.89	0	2.44	0	0.87	0	106	0	13	0	17	0	7.4
869	3	0	0	54	0	0	1	1	0	0	0	0	1	1	3	1	0	0	1	1	0	0	0	0	0	0	0	0	0	0	18.4	0	4.25	0	131	0	5.56	0	3.58	0	1.54	0	248	0	106	1	81	1	75
870	4	0	0	62	0	0	0	0	2	1	0	0	1	1	3	1	0	0	1	0	0	0	0	1	0	0	0	0	1	1	15.7	0
871	3	0	0	58	0	0	2	1	0	0	0	0	1	1	3	1	0	0	1	1	0	1	10	1	1	0	0	0	1	1	22.2	0	4.88	0	141	0	9.66	0	6.12	0	2.26	0	203	0	172	1	118	1	109.4
872	1	1	0	47	0	0	0	0	0	0	0	0	1	1	3	1	0	0	0	0	0	1	2	0	0	1	0	0	0	0	27.1	1	4.3	0	133	0	5	0	2.68	0	1.84	0	205	0	25	0	34	0	18.4
873	4	0	0	51	0	0	2	1	0	0	0	0	1	1	1	0	0	0	1	0	0	0	0	0	0	0	0	0	0	0	22.2	0	5.23	0	151	0	19.03	1	15.44	1	2.76	0	171	0	104	1	83	1	68.1
874	4		0	59	0	0	0	0	0	0	0	0	1	1	2	1	0	0	1	0	0	1	5	1	0	0	0	0	1	1	19.5	0	4.29	0	124	0	10.7	1	8.6	1	1.7	0	232	0	24	0	22	0	18.3
875	3		1	56	0	0	0	0	1	1	0	0	0	0	3	1	0	0	1	1	0	0	0	0	1	0	0	0	0	0	22.1	0	5.95	0	156	0	7.46	0	5.88	0	1.12	0	156	0	178	1	84	1	252.2
876	3	0	0	57	0	0	0	0	6	1	1	1	2		1	0	0	0	1	0	0	0	0	0	0	0	1	0	0	0	26.5	1	4.81	0	144	0	10.92	1	9.55	1	0.85	0	180	0	13	0	15	0	10.7
877	3		1	67	1	0	3	1	0	0	0	0	0	0	2	1	0	1	0	0	0	0	0	0	0	0	0	0	0	0	17.8	0	3.84	0	117	1	3.83	0	2.33	0	1.17	0	191	0	273	1	189	1	18.6
878	4	0	0	48	0	0	0	0	0	0	0	0	2		2	1	0	0	1	0	1	1	15	0	0	0	0	0	0	0	21.4	0	5.78	0	181	0	10.74	1	7.77	1	2.46	0	161	0	87	1	46	1	24.4
879		0	1	57	0	0	2	1	2	1	0	0	1	1	3	1	0	0	1	0	0	0	0	0	0	0	0	0	0	0
880		0	0	51	0	0	2	1	0	0	0	0	1	1	3	1	0	0	1	0	0	0	0	0	0	0	0	0	1	0	19.6	0	4.39	0	132	0	5.28	0	3.28	0	1.8	0	85	0	30	0	35	0	10.5
881	1	0	0	72	1	0	0	0	0	0	0	0	1	1	2	1	0	0	1	0	0	1	10	1	1	0	0	0	1	1	24	1	4.86	0	146	0	5.26	0	3.04	0	1.81	0	179	0	12	0	14	0	9.3
882	4	0	1	62	0	0	2	1	3	1	0	0	1	1	3	1	0	0	1	0	0	0	0	0	0	0	0	0	0	0	19.5	0	4.2	0	131	0	5.51	0	3.33	0	1.75	0	159	0	32	0	31	0	14.1
883	2	1	1	60	0	0	0	0	0	0	0	0	2		3	1	0	0	1	0	0	0	0	0	0	0	0	0	0	0	27.5	1	3.42	1	100	1	3.21	0	1.95	0	0.96	0	180	0	10	0	24	0	2.5
884	3		0	67	1	0	0	0	0	0	2	1	1	1	2	1	0	0	1	0	0	0	0	0	0	0	0	0	0	0	32.2	1	4.24	0	128	0	4.88	0	2.91	0	1.51	0	204	0	140	1	113	1	39.4
885	4	0	0	68	1	0	1	1	0	0	1	1	1	1	3	1	0	0	0	0	0	1	15	0	1	0	0	0	0	0	23.3	0	3.39	1	110	1	11	1	9.7	1	0.8	0	156	0	18	0	20	0	13.4
886	3		0	54	0	0	0	0	0	0	0	0	1	1	3	1	0	0	1	0	0	0	0	1	0	0	0	0	0	0	25.4	1	4.99	0	147	0	6.9	0	3.83	0	2.53	0	209	0	684	1	264	1	15.1
887	4	0	1	56	0	0	1	1	0	0	0	0	1	1	0	1	0	0	1	0	1	1		0	0	0	0	0	0	0	21.9	0	3.95	0	115	1	4.2	0	2.1	0	1.9	0	160	0	15	0	14	0	7.4
888	4		0	63	0	0	0	0	0	0	0	0	1	1	3	1	0	0	1	0	1	1	5	0	0	0	0	0	0	0	16.3	0	3.69	0	114	1	8.19	0	3.77	0	3.5	0	304	1	28	0	27	0	7.5
889	4	0	1	79	1	0	1	1	0	0	0	0	1	1	0	1	0	0	1	0	1	1	10	0	1	0	0	0	0	0	27.1	1	3.95	0	122	0	6.34	0	3.82	0	2.03	0	279	0	16	0	32	0	25.8
890	1	0	1	54	0	0	0	0	0	0	0	0	1	1	3	1	0	0	1	0	1	0	0	0	0	0	0	0	0	0	21.1	0	4.18	0	127	0	4.76	0	3.08	0	1.15	0	235	0	34	0	45	1	20.7
891	3	0	0	52	0	0	0	0	5	1	0	0	2		2	1	0	0	1	1	0	0	0	0	0	1	0	0	0	0	18.3	0	4.09	0	131	0	6.71	0	3.97	0	2.26	0	235	0	142	1	156	1	28.8
892	3		0	75	1	0	0	0	0	0	0	0	1	1	3	1	0	0	1	0	0	0	0	0	1	0	0	0	0	0	21.6	0	5.42	0	148	0	4.55	0	2.7	0	1.66	0	122	0	27	0	27	0	6.3
893	4	0	1	69	1	0	0	0	0	0	0	0	1	1	3	1	0	0	1	0	0	1	4	0	0	0	0	0	0	0	22.1	0	4	0	121	0	3.61	0	1.89	0	1.51	0	130	0	88	1	63	1	13.6
894	4		0	54	0	0	0	0	6	1	0	0	1	1	3	1	0	0	1	0	0	0	0	0	0	0	0	0	1	0	18.7	0	4.34	0	127	0	5.48	0	3.65	0	1.38	0	220	0
895	4	0	0	70	1	0	2	1	0	0	0	0	1	1	1	0	0	0	1	0	0	1	5	1	0	0	0	0	0	0	22.1	0	2.92	1	96	1	3.73	0	2.25	0	1.25	0	237	0	12	0	19	0	16.6
896	2		0	71	1	0	0	0	0	0	0	0	0	0	2	1	0	0	0	1	0	1	2	0	1	0	0	0	0	0	27.4	1	4.14	0	128	0	8.17	0	5.94	0	1.61	0	140	0	39	0	38	0	454
897	1	0	0	68	1	0	3	1	0	0	0	0	1	1	3	1	0	0	1	0	0	1	5	1	0	0	0	0	0	0	21.7	0	4.57	0	140	0	5.22	0	3.69	0	1.29	0	108	0	16	0	21	0	30.8
898	1	1	1	75	1	0	0	0	0	0	0	0	1	1	3	1	0	0	0	1	0	0	0	1	1	0	0	0	0	0	21.8	0	4.02	0	116	1	9.49	0	7.64	1	1.33	0	307	1	248	1	177	1	24.7
899	3		1	60	0	0	0	0	0	0	0	0	0	0	2	1	0	1	0	0	0	0	0	1	1	0	0	0	0	0	22.2	0	4.14	0	126	0	4.64	0	2.83	0	1.36	0	153	0	11	0	14	0	12.1
900	3	0	0	65	1	0	0	0	0	0	0	0	0	0	3	1	0	0	1	1	0	1	5	1	1	1	0	0	0	1	23.8	0	4.46	0	136	0	4.52	0	2.71	0	1.47	0	143	0	49	1	18	0	9.7
901	3		0	61	0	0	0	0	0	0	0	0	1	1	0	1	0	0	0	0	0	1	2	0	1	0	0	0	1	0			4.45	0	139	0	5.52	0	3.58	0	1.58	0	166	0	14	0	17	0	7.7
902	1	1	0	73	1	0	1	1	0	0	0	0	1	1	3	1	0	1	0	0	0	0	0	0	0	0	1	0	1	1	21.2	0	4.64	0	143	0	3.84	0	2.54	0	0.98	0	163	0	39	0	34	0	6.6
903	4		1	44	0	0	0	0	2	1	0	0	0	0	2	1	0	0	1	1	0	0	0	0	0	0	0	0	0	0	28.1	1	4.82	0	140	0	5.27	0	3.02	0	1.92	0	140	0	19	0	22	0	7.1
904	4		0	46	0	0	0	0	1	1	0	0	1	1	1	0	0	0	1	0	0	1	5	0	0	0	1	0	0	0	23.3	0	4.18	0	134	0	17.07	1	15.06	1	0.63	0	169	0	314	1	410	1	40.4
905	4		0	65	1	0	2	1	2	1	0	0	0	0	3	1	0	0	1	0	1	1	3	0	0	0	0	0	0	0	24.4	1	4.25	0	135	0	13.01	1	11.64	1	0.87	0	192	0	294	1	327	1	14.8
906	4	0	0	53	0	0	0	0	0	0	0	0	1	1	1	0	0	0	1	0	0	0	0	0	0	0	0	0	0	0	21.8	0	5.02	0	150	0	7.83	0	5.78	0	1.62	0	213	0	16	0	17	0	11.2
907	3	0	1	57	0	0	0	0	5	1	3	1	0	0	2	1	0	0	1	0	0	1	3	0	0	0	0	0	0	0	26	1	4.4	0	139	0	4.19	0	2.04	0	1.64	0	135	0	16	0	17	0	8.2
908	3		0	63	0	0	0	0	1	1	0	0	1	1	1	0	0	0	1	0	0	0	0	0	0	0	0	0	0	0	21.1	0	4.53	0	140	0	6.84	0	4.56	0	1.84	0	143	0	412	1	363	1	38.8
909	4		0	51	0	0	0	0	2	1	0	0	1	1	3	1	0	0	1	0	0	1	15	0	1	0	0	0	0	0	21.8	0	4.52	0	138	0	3.97	0	2.17	0	1.29	0	128	0	36	0	22	0	14.9
910	2	1	1	66	1	0	0	0	0	0	0	0	1	1	0	1	0	0	1	0	0	0	0	0	0	0	0	0	0	0	25.9	1	3.89	0	119	1	4.96	0	2.4	0	1.87	0	179	0	20	0	25	0	4.4
911	3		0	61	0	0	0	0	0	0	0	0	1	1	1	0	0	0	0	1	0	1	10	1	1	0	0	0	0	0	23.9	0	3.94	0	118	1	11.5	1	7.75	1	2.87	0	313	1	188	1	277	1	252.3
912	4		0	52	0	0	2	1	2	1	0	0	1	1	1	0	0	0	1	1	0	0	0	0	0	0	0	0			25.4	1	4.11	0	126	0	6.92	0	4.71	0	1.71	0	112	0	47	1	39	0	9.7
913	4	0	0	52	0	0	2	1	0	0	0	0	1	1	2	1	0	0	1	0	0	0	0	0	0	0	0	0	0	0	22.2	0	4.42	0	140	0	8.86	0	6.75	0	1.21	0	305	1	20	0	21	0	10.7
914	3	0	0	40	0	0	0	0	1	1	0	0	2		3	1	0	0	1	1	0	1	5	0	0	0	0	0	1	0	22	0	4.16	0	127	0	4.52	0	2.53	0	1.32	0	304	1	160	1	85	1	60.4
915	3	0	1	58	0	0	1	1	6	1	0	0	1	1	1	0	0	0	1	0	0	1	10	0	0	0	0	0	0	0	20.3	0	4.23	0	127	0	5.81	0	3.28	0	2.3	0	238	0	6	0	15	0	5.5
916	4		0	70	1	0	0	0	6	1	0	0	1	1	3	1	0	1	0	0	0	0	0	0	0	1	0	0	0	0	22.7	0	4.64	0	146	0	5.74	0	3.29	0	1.67	0	137	0	14	0	19	0	11.6
917	4	0	1	43	0	0	0	0	2	1	0	0	1	1	3	1	0	0	1	0	0	1	5	0	0	0	1	1	0	0	18.2	0	3.82	0	126	0	7.77	0	5.31	0	1.98	0	295	0	348	1	191	1	50.6
918	3	0	0	49	0	0	1	1	0	0	0	0	1	1	1	0	0	0	1	0	0	1	15	0	1	0	0	0	1	0			3.93	0	119	1	4.28	0	2.89	0	0.96	0	171	0	38	0	37	0	13.7
919	3		1	75	1	0	0	0	0	0	0	0	0	0	2	1	0	0	0	0	1	0	0	0	0	0	0	0	0	0	19	0	3.33	1	111	1	7.56	0	4.57	0	1.4	0	293	0	149	1	152	1	178.6
920	2	1	0	47	0	0	0	0	0	0	0	0	1	1	3	1	0	1	0	0	0	0	0	1	0	0	0	0	0	0	21.1	0	4.32	0	131	0	5.93	0	3.51	0	1.89	0	192	0	22	0	20	0	9.5
921	4	0	0	56	0	0	2	1	0	0	0	0	1	1	3	1	0	0	1	0	0	1	10	0	0	0	1	0	1	1	19.6	0	5.05	0	152	0	8.41	0	6.16	0	1.58	0	156	0	23	0	44	1	10.4
922	1		0	52	0	0	0	0	0	0	0	0	1	1	3	1	0	0	1	0	0	0	0	0	0	0	0	0	0	0	26.8	1	4.47	0	130	0	4.12	0	2.1	0	1.46	0	234	0	18	0	20	0	11.3
923	1		1	60	0	0	0	0	2	1	0	0	1	1	3	1	0	0	1	1	0	1	5	1	1	0	0	0	0	0	24.2	1	3.97	0	118	1	5.82	0	3.2	0	2.24	0	272	0	451	1	411	1	203.6
924	2		0	71	1	0	0	0	0	0	0	0	1	1	3	1	0	0	1	0	0	1	10	1	0	0	0	0	0	0	25.3	1	4.72	0	140	0	6.11	0	3.22	0	2.52	0	157	0	9	0	14	0	13.4
925	4	1	0	81	1	0	0	0	0	0	0	0	1	1	3	1	0	0	1	1	1	0	0	0	0	0	0	0	0	0	18.4	0
926	2		1	73	1	0	0	0	0	0	0	0	1	1	3	1	0	0	1	0	0	0	0	1	1	0	0	0	0	0	26.3	1	4.1	0	114	1	5.69	0	3.67	0	1.77	0	254	0	12	0	14	0	8
927	3	0	0	60	0	0	0	0	0	0	0	0	1	1	2	1	0	0	1	1	1	1	3	0	0	0	0	0	1	1	28.4	1	4.59	0	137	0	6.43	0	3.24	0	2.87	0	156	0	18	0	17	0	11.7
928	4		0	47	0	0	0	0	6	1	0	0	0	0	3	1	0	0	1	0	1	1	5	0	1	0	1	0	0	0	21.2	0	6.31	0	162	0	8.24	0	5.65	0	1.91	0	246	0	67	1	34	0	13.3
929	4		0	41	0	0	0	0	6	1	0	0	0	0	3	1	0	0	1	0	0	0	0	0	0	0	0	0	0	0	17.6	0	3.82	0	117	1	4.07	0	2.53	0	1.14	0	174	0	197	1	140	1	32.1
930	4	0	0	78	1	0	0	0	0	0	0	0	1	1	2	1	0	1	0	0	0	0	0	0	0	0	0	0	0	1	24.9	1	4.11	0	131	0	4.91	0	2.55	0	1.95	0	125	0	64	1	62	1	25.9
931	3		0	64	0	0	0	0	0	0	0	0	0	0	3	1	0	0	1	0	0	0	0	0	0	0	0	0	1	1	24.5	1	4.84	0	131	0	4.29	0	2.58	0	1.43	0	92	0	24	0	21	0	9.1
932	4	0	0	57	0	0	0	0	2	1	0	0	1	1	1	0	0	0	1	0	0	0	0	0	1	0	0	0	1	0	29.4	1	5.21	0	139	0	5.16	0	3.09	0	1.66	0	185	0	34	0	30	0	9.6
933		0	0	81	1	0	0	0	2	1	0	0	1	1	1	0	0	0	1	0	0	1	10	0	0	0	0	0	0	0	17.5	0	3.58	0	104	1	18	1	15.82	1	1.81	0	74	0	22	0	56	1	23.9
934	4	0	0	59	0	0	0	0	2	1	0	0	1	1	3	1	0	0	1	0	0	0	0	0	0	0	0	0	0	0	23.5	0	3.07	1	88	1	6.67	0	5.43	0	0.74	0	166	0	7	0	12	0	7.3
935			0	73	1	0	2	1	0	0	0	0	1	1	2	1	0	0	0	1	0	0	0	0	0	0	0	0	0	1	21	0	2.93	1	98	1	8.62	0	7.7	1	0.59	0	154	0	132	1	149	1	568
936	3	0	0	65	1	0	0	0	2	1	0	0	1	1	2	1	0	0	1	1	0	0	0	0	0	0	0	0	1	0	20.6	0	4.8	0	132	0	5.34	0	2.53	0	2.1	0	175	0	10	0	28	0	9.7
937	3	0	1	74	1	0	0	0	0	0	0	0	1	1	3	1	0	0	1	0	1	1	10	0	0	0	1	0	0	0	21.1	0	3.61	0	109	1	5.53	0	3.97	0	1.13	0	231	0	19	0	20	0	7
938	4		1	60	0	0	0	0	0	0	0	0	0	0	3	1	0	0	1	0	0	0	0	0	1	1	0	0	0	0			4.9	0	97	1	4.01	0	2.11	0	1.77	0	226	0	31	0	40	0	6.9
939	3		0	72	1	0	0	0	0	0	0	0	1	1	3	1	0	0	1	1	0	1	3	0	0	0	0	0	1	0	19.7	0													38	0	22	0	33
940	3	0	0	53	0	0	0	0	6	1	1	1	0	0	2	1	1	0	1	1	1	1	5	0	0	0	0	0	1	1	21.5	0	4.46	0	136	0	3.99	0	2.2	0	1.33	0	159	0	139	1	64	1	110.6
941	4		0	75	1	0	2	1	2	1	0	0	0	0	3	1	0	0	1	0	0	0	0	0	0	0	0	0	0	0	23.1	0	4.53	0	130	0	7.1	0	4.3	0	2.2	0	103	0	312	1	513	1	9.1
942	1	0	0	47	0	0	3	1	0	0	0	0	1	1	2	1	0	1	0	0	0	0	0	1	0	0	0	0	0	0	27.3	1	3.8	0	129	0	3.95	0	1.86	0	1.74	0	131	0	27	0	19	0	8.1
943	3	0	1	54	0	0	0	0	0	0	0	0	1	1	3	1	0	0	1	0	0	1	10	0	0	0	0	0	0	0	24.8	1	4.49	0	133	0	4.97	0	3.34	0	1.18	0	237	0	73	1	32	0	6.2
944	2	0	0	57	0	0	0	0	6	1	0	0	0	0	3	1	0	1	0	0	0	0	0	0	0	0	1	1	0	0	22.4	0	4.79	0	142	0	6.21	0	3.42	0	2.24	0	280	0	17	0	13	0	7.9
945	4		0	87	1	0	1	1	0	0	0	0	1	1	1	0	0	0	1	0	0	0	0	1	1	0	0	0	1	1	21	0	3.53	0	119	1	7.41	0	4.27	0	2.51	0	186	0	13	0	16	0	7.3
946	4		0	63	0	0	3	1	0	0	0	0	1	1	3	1	0	0	1	0	0	1	2.5	0	0	0	1	1	0	0	24.2	1	5.01	0	144	0	7.73	0	5.72	0	1.3	0	143	0	13	0	57	1	55
947	4	0	1	60	0	0	1	1	2	1	0	0	0	0	3	1	0	0	1	0	0	0	0	0	0	0	0	0	1	0	27.1	1	4.17	0	123	0	5.2	0	3.5	0	1.5	0	205	0	61	1	34	0	7.4
948	4	0	0	73	1	0	0	0	0	0	0	0	1	1	1	0	0	0	1	1	0	1	2	1	1	0	0	0	0	0	27	1	3.99	0	130	0	7.43	0	4.71	0	2.23	0	187	0	277	1	157	1	177.3
949	4	0	0	53	0	0	0	0	0	0	0	0	1	1	3	1	0	0	1	0	0	1	8	0	1	0	0	0	0	0			3.76	0	97	1	10.4	1	8.7	1	0.9	0	190	0	47	1	57	1	21.8
950	1	0	0	72	1	0	0	0	0	0	0	0	1	1	3	1	0	0	0	1	0	1	2	0	0	0	0	0	1	0	24	1	3.84	0	116	1	5.77	0	3.93	0	1.17	0	217	0	67	1	67	1	90.1
951	3		1	52	0	0	0	0	6	1	0	0	1	1	2	1	0	0	1	0	0	0	0	0	0	0	0	0	0	0			4.11	0	122	0	3.93	0	1.7	0	1.85	0	235	0	9	0	18	0	12.3
952	4	0	1	67	1	0	1	1	0	0	0	0	1	1	3	1	0	0	1	0	0	1	3	0	0	0	0	0	0	0	23	0													15	0	22	0	10.5
953	4		0	47	0	0	2	1	0	0	0	0	1	1	1	0	0	0	1	0	0	0	0	1	0	0	0	0	0	1	22.9	0
954	4		1	60	0	0	2	1	0	0	0	0	1	1	3	1	0	1	0	0	0	0	0	0	0	0	1	0	0	0	22.2	0	4.21	0	130	0	5.66	0	3.66	0	1.61	0	154	0	14	0	18	0	25.8
955	3		1	54	0	0	0	0	0	0	0	0	1	1	3	1	0	0	1	1	0	0	0	0	1	1	0	0	0	0	29.3	1	4.59	0	138	0	4.92	0	2.66	0	2.01	0	220	0	53	1	47	1	16
956	3		1	76	1	0	0	0	0	0	0	0	1	1	1	0	0	0	1	0	0	1	5	1	1	0	0	0	0	0	25	1	3.37	1	106	1	6.54	0	4.2	0	1.67	0	232	0	17	0	20	0	7.8
957	1	1	1	46	0	0	0	0	0	0	0	0	1	1	2	1	0	0	0	0	1	0	0	0	0	0	0	0	0	0	23.7	0	4.49	0	137	0	9.1	0	7.2	0	1.7	0	170	0	10	0	17	0	20.6
958	2	0	1	78	1	0	0	0	0	0	0	0	1	1	1	0	0	0	0	1	0	0	0	0	0	0	0	0	0	0	20.9	0	3.26	1	108	1	4.96	0	3.15	0	1.59	0	171	0	10	0	24	0	10.8
959	4		0	73	1	0	0	0	5	1	0	0	1	1	3	1	0	0	1	0	0	1	10	0	1	0	0	0	0	0	24	1	4.28	0	136	0	6.57	0	4.06	0	2.04	0	170	0	30	0	30	0	13.7
960	3	0	0	62	0	0	0	0	0	0	0	0	1	1	2	1	0	0	1	1	0	1	15	1	0	0	0	0	1	1	20.9	0	3.69	0	114	1	5.68	0	3.71	0	1.68	0	205	0	19	0	21	0	54.2
961	4	0	1	37	0	0	2	1	6	1	0	0	1	1	3	1	0	0	1	0	0	0	0	0	0	0	0	0	1	1	19.6	0	4	0	133	0	6.75	0	4.6	0	1.69	0	189	0	10	0	13	0	10
962	2	0	0	35	0	0	0	0	0	0	0	0	1	1	1	0	0	0	1	1	1	0	0	0	0	0	0	0	1	0	22.8	0	4.39	0	141	0	5.4	0	3.78	0	1.02	0	162	0	425	1	220	1	318.9
963	4	1	0	57	0	0	1	1	0	0	0	0	1	1	3	1	0	1	0	0	0	0	0	0	1	0	0	0	0	0	23	0	5.13	0	140	0	4.36	0	2.97	0	1.11	0	187	0	24	0	21	0	22.1
964	3		1	64	0	0	3	1	0	0	0	0	1	1	3	1	0							0	0	0	0	0	0	0	25.7	1
965	3	0	0	63	0	0	0	0	0	0	0	0	0	0	2	1	0	0	1	0	0	0	0	0	0	0	0	0	0	1	25.5	1	4.77	0	148	0	5.23	0	3.57	0	1.34	0	154	0	14	0	15	0	12.8
966	3	0	1	63	0	0	2	1	0	0	0	0	1	1	2	1	0	0	1	1	1	1	5	0	0	0	0	0	0	0	21.2	0	3.54	0	111	1	5.88	0	3.71	0	1.56	0	287	0	189	1	124	1	197
967	4	0	0	54	0	0	0	0	0	0	0	0	1	1	3	1	0	0	1	0	1	0	0	0	1	0	0	0	0	1	24.4	1
968	1	0	1	49	0	0	0	0	6	1	1	1	1	1	3	1	0	0	0	0	0	1	2	1	0	0	0	0	0	0	22.2	0	5.06	0	153	0	6.71	0	3.9	0	2.49	0	276	0	22	0	19	0	9.5
969	3	0	0	75	1	0	0	0	0	0	0	0	1	1	1	0	0	0	1	0	1	1	5	1	1	0	0	0	0	0	23.9	0	4.14	0	135	0	5.76	0	3.86	0	1.62	0	134	0	14	0	17	0	7.9
970	4		1	63	0	0	0	0	6	1	0	0	0	0	2	1	0	0	1	0	0	1	5	0	0	0	0	0	0	0	20.2	0	2.96	1	84	1	9.12	0	5.53	0	2.88	0	301	1	12	0	30	0	5.4
971	4	0	0	70	1	0	0	0	0	0	0	0	0	0	2	1	0	0	1	0	0	1	5	0	0	0	0	0	0	0	20.8	0	4.76	0	148	0	3.32	0	1.78	0	1.2	0	196	0	11	0	17	0	15.3
972	2	0	1	66	1	0	0	0	0	0	0	0	1	1	2	1	0	0	0	1	0	0	0	0	0	0	0	0	0	0	18.2	0	4.3	0	133	0	6.7	0	4.91	0	1.43	0	150	0	260	1	187	1	529.1
973	1	1	0	77	1	0	0	0	2	1	0	0	1	1	1	0	0	0	1	1	1	0	0	0	0	0	0	0	0	0	22.4	0	4.01	0	124	0	6.8	0	4.43	0	1.89	0	132	0	82	1	54	1	322.5
974	4		1	55	0	0	0	0	0	0	0	0	1	1	3	1	0	0	1	0	0	1	5	1	0	0	0	0	0	0	25.3	1	4.73	0	143	0	8.9	0	6.3	0	2.3	0	266	0	49	1	37	0	12.7
975	1	0	1	39	0	0	0	0	0	0	0	0	1	1	1	0	0	0	0	1	0	1	1	0	0	0	0	0	0	0	21.3	0	3.37	1	112	1	7.3	0	3.7	0	3.1	0	307	1	98	1	144	1	141.2
976	3		1	59	0	0	0	0	0	0	0	0	0	0	2	1	0	0	1	1	0	0	0	0	0	0	0	0	0	0	20.3	0	4.19	0	128	0	4.32	0	2.94	0	1.07	0	141	0	137	1	116	1	105.6
977	3		1	63	0	0	0	0	0	0	0	0	0	0	2	1	0	0	0	1	0	0	0	1	0	1	0	0	0	0	25.2	1	3.06	1	96	1	2.88	0	1.32	0	1.35	0	189	0	29	0	37	0	181.4
978	3		0	60	0	0	0	0	0	0	0	0	1	1	3	1	0	0	1	1	1	1	5	0	0	0	0	0	1	0	28.4	1	4.02	0	131	0	10.62	1	6.75	0	3.14	0	239	0	104	1	62	1	158.2
979	3	0	0	42	0	0	0	0	0	0	0	0	0	0	3	1	0	0	0	1	0	0	0	0	0	0	0	0	1	0	29.7	1	4.8	0	142	0	8.57	0	5.72	0	1.86	0	304	1	56	1	49	1	359.9
980	4		0	53	0	0	1	1	0	0	0	0	1	1	2	1	0	0	1	0	0	0	0	0	0	0	0	0	0	0	28.4	1	4.98	0	156	0	12.2	1	8.6	1	2.8	0	209	0	21	0	26	0	14.2
981	3		1	51	0	0	0	0	0	0	0	0	1	1	0	1	0	0	1	0	0	1	15	1	0	0	0	0	0	0			4.07	0	119	1	3.09	0	2.17	0	0.62	0	126	0	43	1	33	0	34.8
982	4		1	54	0	0	1	1	6	1	0	0	1	1	1	0	0	0	1	0	0	0	0	0	1	0	1	0	0	1	21.8	0	3.61	0	113	1	4.11	0	2.71	0	0.67	0	125	0	96	1	88	1	18.3
983	3	0	0	52	0	0	0	0	2	1	2	1	1	1	3	1	0	0	1	1	1	1	5	1	0	0	0	0	0	1	24.7	1	3.4	1	99	1	9.33	0	4.46	0	4.06	1	493	1	72	1	90	1	176.3
984	4		1	53	0	0	0	0	0	0	0	0	0	0	3	1	0	0	1	0	0	1	4	0	0	0	0	0	0	0	22.5	0	3.97	0	117	1	9.29	0	6.17	0	2.25	0	265	0	47	1	32	0	11.8
985	3		1	60	0	0	0	0	0	0	0	0	2		1	0	0	0	1	1	0	0	0	0	0	0	0	0	0	0	23.2	0	3.54	0	113	1	7.3	0	5.7	0	1.2	0	201	0	150	1	145	1	432.2
986	2		1	58	0	0	0	0	2	1	0	0	0	0	3	1	0	0	0	1	0	1	10	0	0	0	0	0	0	0	20.8	0	3.79	0	116	1	8.5	0	4.76	0	2.78	0	421	1	123	1	120	1	23.6
987	3	0	1	73	1	0	0	0	0	0	0	0	1	1	1	0	0	1	0	0	0	0	0	0	1	0	1	0	0	0	27.1	1	4.26	0	137	0	6.31	0	4.25	0	1.47	0	155	0	19	0	20	0	8.2
988	3		1	70	1	0	0	0	2	1	0	0	1	1	1	0	0	0	1	0	0	1	10	1	1	0	0	0	0	0	28.2	1	4.63	0	134	0	4.88	0	2.95	0	1.67	0	154	0	16	0	18	0	13.9
989	3	0	0	51	0	0	0	0	2	1	0	0	1	1	3	1	0	0	1	0	0	0	0	0	0	0	0	0	0	0	23.3	0	5.02	0	162	0	7.32	0	4.42	0	2.53	0	194	0	15	0	18	0	14.1
990	3	0	0	70	1	0	0	0	2	1	0	0	0	0	2	1	0	0	1	1	0	1	10	1	1	0	0	0	0	0	25	1	4.03	0	123	0	8.48	0	7.1	0	1.13	0	172	0	175	1	50	1	71.2
991	4		0	47	0	0	0	0	0	0	0	0	1	1	1	0	0	0	0	0	0	1	5	0	0	0	0	0	0	1	24.9	1	4.6	0	144	0	8.53	0	5.53	0	2.15	0	299	0	30	0	24	0	6.3
992	3		0	51	0	0	0	0	6	1	0	0	0	0	3	1	0	0	1	0	0	0	0	0	0	0	0	0	1	1	19.7	0	4.64	0	149	0	6.87	0	4.07	0	1.58	0	202	0	10	0	19	0	16.3
993	3	0	1	65	1	0	0	0	2	1	0	0	0	0	2	1	0	0	1	0	0	1	5	0	0	1	0	0	1	0	20.8	0	4.41	0	126	0	6.26	0	3.33	0	2.28	0	266	0	15	0	14	0	17.7
994	3		1	65	1	0	0	0	1	1	0	0	1	1	1	0	0	0	1	1	0	1	6	0	0	1	0	0	0	0	23.9	0	4.03	0	124	0	5.81	0	3.99	0	1.29	0	205	0	156	1	117	1	254.4
995	1	0	1	54	0	0	0	0	0	0	0	0	1	1	3	1	0	0	1	0	0	0	0	0	1	0	0	0	0	0	21.8	0	4.59	0	144	0	6.19	0	3.53	0	2.42	0	243	0	16	0	23	0	9.7
996	3		1	47	0	0	0	0	0	0	0	0	1	1	1	0	0	0	1	1	1	1	10	0	0	0	0	0	0	0	23.5	0	3.79	0	117	1	5.16	0	2.93	0	1.86	0	206	0	534	1	318	1	392.4
997	2	1	0	57	0	0	0	0	6	1	0	0	1	1	1	0	0	0	1	0	0	0	0	0	1	0	1	0	0	1	24.3	1	4.74	0	146	0	3.8	0	2.25	0	1.13	0	148	0	27	0	23	0	11.2
998	4	0	0	69	1	0	2	1	0	0	0	0	1	1	1	0	0	0	1	1	0	0	0	0	0	0	0	0	0	0	24.2	1	3.9	0	120	0	7.7	0	5.6	0	1.7	0	300	0	77	1	85	1	561.9
999	4		0	47	0	0	0	0	6	1	0	0	0	0	1	0	0	0	0	1	0	1	5	0	0	0	1	0	1	0	21.3	0	4.01	0	126	0	5.6	0	3.2	0	1.9	0	96	0	87	1	38	0	123.1
1000	4	0	0	69	1	0	0	0	1	1	0	0	0	0	3	1	0	0	1	1	0	0	0	0	0	0	0	0	0	0	21.6	0	4.88	0	144	0	5.57	0	3.69	0	1.13	0	252	0	242	1	142	1	159.5
1001	2	1	0	45	0	0	0	0	0	0	0	0	1	1	2	1	0	0	1	0	0	1	10	0	0	0	0	0	1	0	18.6	0	4.16	0	130	0	4.44	0	2.17	0	1.94	0	113	0	16	0	20	0	8.3
1002	3		0	34	0	0	0	0	1	1	0	0	0	0	2	1	0	0	1	0	0	0	0	0	0	0	0	0	1	1	25.8	1	5.68	0	131	0	12.07	1	9	1	1.98	0	290	0	21	0	17	0	7.7
1003	4		0	63	0	0	0	0	0	0	0	0	1	1	1	0	0	0	1	0	0	0	0	0	0	0	0	0	1	1	21	0	4.81	0	149	0	8.22	0	5.77	0	1.96	0	227	0	26	0	25	0	28.4
1004	4	0	0	71	1	0	0	0	3	1	0	0	1	1	1	0	0	1	0	0	0	0	0	0	0	0	0	0	0	0
1005	1	1	0	55	0	1	0	0	0	0	0	0	1	1	2	1	0	1	0	0	0	0	0	0	0	0	0	0	1	1	27.1	1	4.84	0	149	0	6.32	0	4.1	0	1.61	0	209	0	293	1	82	1	14.7
1006	3	0	0	51	0	0	0	0	0	0	0	0	1	1	2	1	0	0	1	1	0	1	12	0	0	0	0	0	1	0	26.9	1	4.89	0	151	0	5	0	2.71	0	1.92	0	167	0	44	1	35	0	9
1007	4		1	44	0	0	1	1	0	0	0	0	1	1	2	1	0	0	1	0	1	1	6	0	0	0	1	0	0	1	21.5	0	3.52	0	113	1	5.1	0	3.23	0	1.63	0	225	0	23	0	17	0	8.9
1008	3	0	1	65	1	0	0	0	4	1	0	0	0	0	1	0	0	0	1	1	0	1	5	0	0	0	0	0	0	0	21.6	0	3.7	0	122	0	6.32	0	4.41	0	1.42	0	142	0	10	0	80	1	474.5
1009	3	0	0	52	0	0	0	0	0	0	0	0	1	1	1	0	0	0	1	0	0	1	8	0	0	0	0	0	1	1	20.6	0	5.07	0	165	0	6.43	0	4.07	0	1.75	0	299	0	12	0	17	0	19.7
1010	4	0	0	61	0	0	0	0	2	1	0	0	1	1	1	0	0	0	1	0	0	0	0	0	0	0	0	0	0	0	22.3	0
1011	1	0	0	54	0	0	0	0	6	1	0	0	1	1	1	0	0	0	0	0	0	1	20	1	0	0	0	0	0	0	19.8	0	4.73	0	147	0	5.87	0	2.98	0	2.37	0	167	0	287	1	868	1	30.5
1012		1	1	35	0	0	0	0	0	0	0	0	0	0	3	1	0	0	1	1	0	1	3	0	0	0	0	0	0	0	26.2	1
1013	3	0	0	62	0	0	0	0	4	1	4	1	1	1	1	0	0	0	1	1	0	1	5	0	0	0	0	0	1	0	24.1	1	4.74	0	151	0	7.67	0	5.62	0	1.09	0	244	0	111	1	56	1	267.2
1014	3	0	1	53	0	0	0	0	2	1	0	0	1	1	2	1	0	0	1	0	0	0	0	0	0	0	0	0	0	0	20.1	0	4.49	0	133	0	3.81	0	1.88	0	1.59	0	286	0	23	0	23	0	6
1015	4		1	63	0	0	0	0	0	0	0	0	0	0	2	1	0	0	1	0	0	0	0	0	0	0	0	0	0	0	26.2	1	4.08	0	122	0	11.72	1	9.22	1	2	0	232	0	32	0	35	0	10.6
1016	3	0	1	68	1	0	0	0	0	0	0	0	1	1	1	0	0	0	0	1	0	0	0	0	0	0	0	0	0	0	17.6	0	4.86	0	148	0	5.23	0	3.63	0	1.27	0	184	0	310	1	236	1	184.8
1017	4	0	1	68	1	0	0	0	2	1	0	0	1	1	2	1	0	0	1	0	0	1	15	1	0	0	0	0	0	0	23.6	0	4.18	0	124	0	5.26	0	3.07	0	1.82	0	198	0	10	0	18	0	6.2
1018	4		1	57	0	0	0	0	0	0	0	0	0	0	2	1	0	0	1	0	0	1	15	0	0	0	1	0	0	0	19.3	0	3.3	1	88	1	5.04	0	2.68	0	2.12	0	138	0	7	0	9	0	6.5
1019	4	0	0	68	1	0	0	0	0	0	0	0	1	1	1	0	0	0	1	0	0	0	0	0	0	0	0	0	1	0	30.9	1	4.71	0	149	0	5.57	0	3.58	0	1.48	0	84	0	30	0	24	0	18.4
1020			0	61	0	0	2	1	0	0	0	0	1	1	2	1	0	0	0	1	0	0	0	0	0	1	0	0	1	1	19.4	0													83	1	109	1	652.6
1021	4	0	1	39	0	0	1	1	0	0	0	0	1	1	1	0	0	0	1	0	0	1	4	0	0	0	1	0	0	0	20.4	0
1022	3	0	0	67	1	0	0	0	0	0	0	0	0	0	2	1	0	0	1	1	0	0	0	0	0	0	0	0	0	0	19.5	0	3.78	0	119	1	3.92	0	2.11	0	1.31	0	143	0	60	1	67	1	5.3
1023	4	0	1	44	0	0	0	0	0	0	0	0	1	1	1	0	0	0	1	0	0	1	3	0	0	0	0	0	0	0	27.2	1	4.58	0	95	1	4.32	0	2.4	0	1.78	0	264	0	10	0	10	0	18.6
1024	3	0	1	73	1	1	1	1	0	0	0	0	1	1	3	1	0	0	1	1	0	1	8.5	0	1	1	0	0	0	0	20.8	0	4.96	0	150	0	11.11	1	9.15	1	1.37	0	301	1	94	1	37	0	130.8
1025	2	0	0	57	0	0	0	0	0	0	0	0	1	1	1	0	0	0	1	0	0	0	0	0	0	0	0	0	1	0	24.8	1	4.54	0	137	0	6.46	0	3.51	0	2.15	0	299	0	16	0	18	0	14
1026	2	0	1	52	0	0	0	0	0	0	0	0	1	1	1	0	0	0	1	0	0	1	5	0	0	0	1	1	1	0	20.4	0	3.81	0	111	1	3.12	0	2.02	0	0.68	0	114	0	205	1	124	1	71.3
1027	3	0	0	45	0	0	0	0	0	0	0	0	1	1	1	0	0	0	1	0	0	1	6	0	0	0	0	0	0	1	25.5	1	4.71	0	139	0	5.96	0	2.89	0	2.64	0	162	0	76	1	36	0	15.7
1028	3		0	67	1	0	0	0	0	0	0	0	1	1	1	0	0	0	0	1	0	0	0	1	0	0	0	0	1	1	20.9	0	4.02	0	114	1	9.1	0	6.9	0	1.7	0	279	0	142	1	88	1	183.6
1029	3	0	0	53	0	0	0	0	0	0	0	0	1	1	1	0	0	0	1	0	0	1	5	1	1	0	0	0	0	0	20.9	0	4.26	0	136	0	6.19	0	3.51	0	2.47	0	132	0	25	0	19	0	21.1
1030	4	0	0	62	0	0	0	0	0	0	0	0	0	0	2	1	0	0	1	0	1	1	5	0	0	0	0	0	1	0			3.15	1	99	1	1.1	0	0.9	0	0.2	0	103	0	11	0	20	0	9.2
1031	3	0	1	60	0	0	0	0	0	0	0	0	0	0	3	1	0	0	1	1	0	1	6	0	0	0	0	0	0	0	24.4	1	4.21	0	126	0	10.03	1	7.12	0	2.02	0	247	0	189	1	162	1	78
1032	3	0	0	57	0	0	0	0	0	0	0	0	1	1	1	0	0	0	0	1	0	0	0	1	1	0	0	0	0	0	23.7	0	3.3	1	104	1	6.94	0	4.6	0	1.72	0	343	1	467	1	265	1	267.3
1033	4	0	0	71	1	0	0	0	1	1	0	0	2		1	0	0	0	1	0	0	1	5	1	0	0	1	0	0	0	21.4	0	5.31	0	158	0	6.7	0	5.3	0	0.8	0	107	0	24	0	31	0	25.2
1034	3	0	0	74	1	0	0	0	5	1	0	0	1	1	2	1	0	0	1	1	0	1	2	1	0	0	0	0	1	0	23.1	0	4.42	0	147	0	5.14	0	3.15	0	1.64	0	164	0	53	1	23	0	466.1
1035	4	0	1	47	0	0	1	1	0	0	0	0	0	0	2	1	0	0	1	0	0	0	0	0	0	0	0	0	0	0	22.3	0	3.79	0	123	0	6.06	0	3.89	0	1.8	0	251	0	65	1	71	1	13.3
1036	4		0	55	0	0	2	1	6	1	0	0	1	1	1	0	0	0	1	0	0	0	0	1	1	0	0	0	1	1	22.9	0	4.58	0	142	0	8.26	0	5.95	0	1.72	0	138	0	22	0	31	0	16.1
1037	3		0	68	1	0	0	0	0	0	0	0	1	1	1	0	0	0	1	0	0	0	0	0	0	0	0	0	0	0	27.7	1	4.14	0	129	0	4.32	0	2.08	0	1.91	0	134	0	14	0	16	0	39.8
1038	4		0	65	1	0	1	1	2	1	0	0	1	1	1	0	0	0	1	0	0	1	3	0	1	0	0	0	1	1	26.3	1	3.52	0	99	1	5.2	0	4.3	0	0.8	0	81	0	10	0	20	0	6.1
1039	4	0	0	60	0	0	1	1	0	0	0	0	1	1	2	1	0	0	1	0	0	1	10	0	0	1	0	0	1	1	24.2	1	4.55	0	148	0	4.2	0	2.8	0	0.9	0	164	0	18	0	26	0	20.6
1040	4	0	0	55	0	0	0	0	0	0	0	0	1	1	0	1	0	0	1	0	0	1	6	0	0	0	1	0	1	1	20.7	0	5.86	0	174	0	8.9	0	6.8	0	1.5	0	275	0	22	0	53	1	9.8
1041	3		0	53	0	0	0	0	2	1	0	0	0	0	3	1	0	0	1	0	0	1	10	0	0	0	0	0	0	0	20.2	0	4.43	0	148	0	4.93	0	3.13	0	1.36	0	98	0	15	0	17	0	16.9
1042	3		0	48	0	0	0	0	0	0	0	0	0	0	2	1	0	0	1	0	0	0	0	0	0	1	0	0	0	0	20.5	0	4.19	0	144	0	4.81	0	1.94	0	2.49	0	186	0	28	0	56	1	36.2
1043	4		0	61	0	0	0	0	0	0	0	0	1	1	2	1	0	0	1	0	1	1	5	0	0	0	0	0	0	0	37	1	4.76	0	142	0	5.24	0	3.07	0	1.66	0	207	0	22	0	37	0	9
1044	4		0	57	0	0	0	0	2	1	0	0	0	0	3	1	0	0	1	0	0	0	0	0	0	0	0	0	0	0	26.1	1	3.89	0	105	1	12.85	1	10.22	1	1.93	0	152	0	382	1	482	1	26
1045	3	0	0	70	1	0	0	0	0	0	0	0	1	1	1	0	0	0	1	1	1	1	10	1	0	0	0	0	0	0	25	1	4.51	0	142	0	9.36	0	7.66	1	1.25	0	223	0	96	1	65	1	149.1
1046	4	0	0	78	1	0	0	0	0	0	0	0	1	1	1	0	0	1	0	0	0	0	0	1	1	0	0	0	0	0	23.9	0	3.72	0	118	1	5.13	0	2.97	0	1.86	0	134	0	15	0	14	0	10.4
1047		0	0	68	1	0	0	0	0	0	0	0	1	1	1	0	0	0	1	1	0	1	8	0	0	0	0	0	1	0
1048	4	0	1	67	1	0	0	0	0	0	0	0	0	0	2	1	0	0	1	0	0	0	0	0	0	0	0	0	1	1	21.3	0	4.49	0	138	0	6.3	0	4.34	0	1.4	0	188	0	18	0	23	0	9.7
1049	3		1	56	0	0	0	0	0	0	0	0	1	1	1	0	0	0	1	1	0	0	0	1	0	0	0	0	0	0	21	0	4.21	0	124	0	5.18	0	2.93	0	2.02	0	195	0	10	0	14	0	13.6
1050	4	0	0	42	0	0	0	0	0	0	0	0	2		3	1	0	0	1	0	0	1	15	1	1	0	0	0	1	1	25.1	1	3.79	0	113	1	8	0	6.7	0	0.8	0	296	0	47	1	23	0	7.7
1051	3		1	60	0	0	0	0	0	0	0	0	1	1	1	0	0	0	0	1	0	0	0	0	0	0	1	0	0	0	23.4	0	3.85	0	116	1	4.26	0	2.52	0	1.37	0	147	0	136	1	82	1	220.2
1052	3		0	66	1	0	0	0	0	0	0	0	0	0	3	1	0	0	1	1	0	1	2	1	1	0	0	0	0	0	25.1	1	4.64	0	133	0	6.57	0	4.29	0	1.99	0	208	0	321	1	208	1	195.7
1053	1	0	0	54	0	0	0	0	0	0	0	0	1	1	1	0	0	0	1	1	0	0	0	0	1	0	0	0	1	1	28.1	1													214	1	94	1	550.4
1054	4	0	0	56	0	0	0	0	0	0	0	0	1	1	1	0	0	0	1	0	0	0	0	0	1	0	1	0	1	1	23.9	0	3.82	0	123	0	3.42	0	2.11	0	1.08	0	105	0	23	0	22	0	11.9
1055	3		0	60	0	0	0	0	0	0	0	0	0	0	3	1	0	0	1	1	0	0	0	1	0	0	0	0	0	0	22.4	0	4.85	0	145	0	7.21	0	4.3	0	1.94	0	186	0	131	1	65	1	350.2
1056	1	0	0	68	1	0	0	0	2	1	0	0	1	1	1	0	0	0	0	1	0	0	0	1	1	0	0	0	0	1	22.9	0	3.27	1	96	1	7.09	0	5.02	0	1.37	0	301	1	353	1	266	1	489.9
1057	4	0	1	65	1	0	1	1	0	0	0	0	1	1	2	1	0	0	1	0	1	0	0	0	1	0	0	0	0	0
1058		0	0	65	1	0	2	1	0	0	0	0	1	1	1	0	0	0	1	0	0	0	0	0	0	0	1	0	1	0	20.3	0	5.31	0	159	0	7.17	0	4.4	0	2.24	0	112	0	42	1	62	1	7
1059	3	0	0	67	1	0	0	0	0	0	0	0	1	1	2	1	0	0	1	1	0	1	2	0	0	0	0	0	0	0	24.6	1	4.07	0	122	0	4.56	0	2.54	0	1.76	0	147	0	311	1	191	1	100.9
1060	4	0	0	51	0	0	2	1	0	0	0	0	1	1	2	1	0	0	1	0	0	0	0	0	0	0	1	0			22.7	0	4	0	144	0	5.86	0	2.89	0	1.18	0	165	0	31	0	36	0	20.9
1061	4		0	56	0	0	0	0	0	0	0	0	1	1	1	0	0	0	1	0	0	0	0	0	0	0	0	0	0	0	24.6	1	5.34	0	158	0	9.1	0	7.42	0	1.36	0	145	0	57	1	45	1	17.5
1062	2	1	1	52	0	0	0	0	0	0	0	0	1	1	2	1	0	0	1	0	0	1	1	0	0	0	1	0	0	0	19.7	0	4.13	0	117	1	6.45	0	3.63	0	2.76	0	225	0	16	0	14	0	9.2
1063	3	0	1	69	1	0	0	0	2	1	0	0	0	0	3	1	0	0	1	0	0	0	0	0	1	0	0	0	0	0			4.34	0	120	0	7.5	0	5.46	0	1.59	0	183	0	27	0	26	0	4.1
1064	3	1	0	44	0	0	3	1	0	0	0	0	1	1	1	0	0	0	1	0	0	0	0	0	1	0	0	0	1	0	20.4	0	4.23	0	140	0	7.3	0	4.08	0	1.63	0	286	0	107	1	202	1	237.1
1065	3	0	1	67	1	0	0	0	0	0	0	0	0	0	3	1	0	0	1	0	0	1	5	1	1	1	0	0	0	0	15.8	0	4.35	0	128	0	4.73	0	3.25	0	1.24	0	139	0	12	0	18	0	33.1
1066	3		0	72	1	0	0	0	0	0	0	0	0	0	3	1	0	0	0	1	0	0	0	0	0	1	0	0	0	0			3.06	1	101	1	13.86	1	11.92	1	1.26	0	679	1	31	0	27	0	926.7
1067	2	1	1	58	0	0	0	0	6	1	0	0	0	0	3	1	0	0	1	1	0	0	0	0	0	0	0	0	1	1	20.8	0	3.65	0	117	1	4.88	0	3.11	0	1.18	0	147	0	323	1	153	1	213.4
1068	4		0	56	0	0	0	0	0	0	0	0	1	1	2	1	0	0	1	0	0	1	2	0	0	0	0	0	0	0	21.3	0	3.72	0	116	1	6.02	0	3.42	0	1.76	0	178	0	32	0	34	0	12.5
1069	4		0	58	0	0	2	1	0	0	0	0	1	1	2	1	0	0	1	0	0	0	0	1	0	0	0	0	0	1	24.2	1	5.07	0	139	0	11.7	1	10.2	1	0.9	0	135	0	388	1	395	1	20.8
1070	4		1	60	0	0	1	1	6	1	4	1	0	0	3	1	0	0	1	0	1	1	6	0	1	0	1	1	0	0	23.3	0	4.11	0	139	0	4.45	0	1.97	0	1.79	0	160	0	18	0	27	0	25.6
1071	4	0	0	47	0	0	0	0	0	0	0	0	1	1	1	0	0	0	1	0	0	0	0	0	0	0	0	0			27.8	1	4.72	0	146	0	7.41	0	4.62	0	2.01	0	235	0	10	0	13	0	9.5
1072	2	1	0	70	1	0	0	0	0	0	0	0	1	1	1	0	0	0	1	0	1	1	5	0	0	0	0	0	1	1	24.6	1	4.62	0	146	0	6.12	0	3.58	0	1.83	0	279	0	11	0	11	0	8.2
1073	2		1	68	1	0	1	1	2	1	0	0	1	1	1	0	0	1	0	0	0	0	0	0	0	0	0	0	0	0	25.5	1	3.57	0	114	1	4.06	0	1.85	0	1.86	0	139	0	11	0	16	0	9.1
1074	4	0	0	54	0	0	1	1	0	0	0	0	0	0	3	1	0	0	1	0	0	1	10	0	1	0	0	0	0	0	26	1	4.28	0	131	0	13.1	1	8.7	1	1.5	0	275	0	18	0	26	0	12.9
1075	3	0	1	64	0	0	0	0	0	0	0	0	1	1	2	1	0	0	1	0	0	0	0	0	0	1	0	0	0	0			4.33	0	126	0	3.86	0	1.98	0	1.28	0	117	0	43	1	38	0	14.6
1076			0	74	1	0	2	1	0	0	0	0	1	1	1	0	0	0	1	0	0	0	0	0	0	0	0	0	0	0	26.1	1	4.87	0	148	0	6.77	0	3.43	0	2.54	0	143	0	12	0	19	0	14.3
1077	3		0	71	1	0	0	0	6	1	0	0	1	1	1	0	0	0	0	0	0	1	10	1	0	1	1	0	0	0	25.5	1	4.39	0	132	0	6.21	0	4.06	0	1.64	0	181	0
1078	3		1	59	0	0	0	0	0	0	0	0	0	0	3	1	0	0	1	1	0	1	5	0	0	0	1	0	0	1	22	0	3.87	0	114	1	5.29	0	3.32	0	1.69	0	240	0	267	1	142	1	126.5
1079	3	0	1	67	1	0	0	0	0	0	0	0	1	1	1	0	0	0	1	1	0	1	5	0	0	0	0	0	0	0	24.2	1	4.19	0	123	0	5.46	0	3.6	0	1.17	0	164	0	505	1	579	1	154.5
1080	1	1	0	65	1	0	0	0	0	0	0	0	1	1	1	0	0	1	0	0	0	0	0	1	0	0	0	0	0	0	22.9	0	3.97	0	125	0	13.98	1	6.05	0	7.12	1	157	0	11	0	13	0	7.8
1081	4	0	0	80	1	0	2	1	0	0	0	0	1	1	1	0	0	0	1	0	0	1	10	0	0	0	0	0	0	0	20.3	0	3.99	0	114	1	5.53	0	4.24	0	0.65	0	132	0	25	0	40	0	44.1
1082	4		1	70	1	0	0	0	0	0	0	0	1	1	1	0	0	0	1	0	0	1	6	0	0	0	1	0	0	0	18.7	0	4.05	0	126	0	5.92	0	3.94	0	1.69	0	196	0	14	0	33	0	5.7
1083	3	0	0	68	1	0	2	1	5	1	0	0	1	1	1	0	0	1	0	0	0	0	0	1	0	0	0	0	0	0	23	0	4.54	0	140	0	7.45	0	5.48	0	1.51	0	120	0	17	0	11	0	8.9
1084	4		1	67	1	0	2	1	0	0	0	0	1	1	1	0	0	0	1	0	0	0	0	1	1	0	0	0	0	0	27.3	1	4.56	0	132	0	7.15	0	5.05	0	1.51	0	215	0	120	1	80	1	15.3
1085	3	0	1	58	0	0	0	0	0	0	0	0	0	0	2	1	0	0	1	1	0	0	0	0	0	0	0	0	0	0	17.9	0	4.26	0	141	0	4.57	0	2.62	0	1.63	0	280	0	73	1	69	1	503.9
1086	2		0	62	0	0	0	0	0	0	0	0	1	1	2	1	0	0	0	1	0	0	0	0	0	0	0	0	0	0	21.5	0	4.1	0	132	0	5.55	0	3.53	0	1.33	0	274	0	344	1	204	1	592.8
1087	4	0	1	70	1	0	0	0	6	1	0	0	1	1	1	0	0	1	0	0	0	0	0	0	0	0	0	0	0	0	22.4	0													24	0	33	0	10.4
1088	3	0	0	63	0	0	0	0	0	0	0	0	1	1	2	1	0	0	1	1	0	1	5	0	0	0	0	0	0	0	19.1	0	2.94	1	98	1	10.91	1	8.14	1	1.56	0	283	0	383	1	338	1	441.7
1089	3		0	70	1	0	0	0	0	0	0	0	2		3	1	0
1090	4	0	1	73	1	0	0	0	0	0	0	0	1	1	2	1	0	1	0	0	0	0	0	0	1	0	0	0	0	0	24.3	1	3.96	0	135	0	6.25	0	4.1	0	1.81	0	170	0	14	0	14	0	8.8
1091	3	1	1	77	1	0	0	0	2	1	0	0	0	0	2	1	0	0	1	0	0	1	5	0	0	1	0	0	0	0	19.5	0	3.32	1	101	1	7.96	0	7.17	0	0.55	0	136	0	78	1	121	1	12.7
1092	3		0	62	0	0	2	1	0	0	0	0	0	0	3	1	0	0	1	0	0	0	0	0	0	0	0	0	0	0	21	0	4.89	0	137	0	4.57	0	2.58	0	1.65	0	260	0	24	0	35	0	7.2
1093	3	0	1	60	0	0	0	0	0	0	0	0	1	1	2	1	0	0	0	1	0	0	0	1	0	0	0	0	0	0	26	1	3.75	0	108	1	7.12	0	4.2	0	2.45	0	284	0	50	1	29	0	175.7
1094	1		0	42	0	0	1	1	0	0	0	0	1	1	1	0	0							0	0	0	0	0	0	0	24.7	1	4.6	0	143	0	6.37	0	3.36	0	2.07	0	258	0	63	1	49	1	5
1095	4	0	0	50	0	0	2	1	0	0	0	0	0	0	3	1	0	0	1	0	1	1	15	0	0	0	0	0	0	0	22.8	0	4.13	0	129	0	3.9	0	2.27	0	1.11	0	127	0	92	1	114	1	22.2
1096	2		1	27	0	0	0	0	0	0	3	1	0	0	3	1	0	0	1	0	0	0	0	0	0	0	0	0	0	0	20.4	0	4.3	0	134	0	6.53	0	4.09	0	1.82	0	199	0	13	0	14	0	4.3
1097	3		1	69	1	0	2	1	0	0	0	0	1	1	1	0	0	0	1	0	0	0	0	0	0	0	0	0	0	0	25	1	3.87	0	117	1	7.53	0	5.88	0	1.25	0	144	0	8	0	15	0	5.1
1098	3		1	57	0	0	0	0	0	0	0	0	0	0	2	1	0	0	1	0	0	0	0	1	0	0	0	0	0	0	18.7	0	3.88	0	115	1	2.73	0	0.8	0	1.71	0	130	0	16	0	11	0	5.1
1099	4		1	74	1	0	0	0	0	0	0	0	1	1	3	1	0	0	0	1	0	0	0	0	0	0	0	0	0	0	23.6	0	3.31	1	108	1	4.7	0	2.8	0	1.5	0	185	0	14	0	20	0	42.5
1100	4	0	1	61	0	0	2	1	0	0	0	0	1	1	1	0	0	0	1	0	1	1	10	0	1	0	0	0	0	0	22.3	0	4.39	0	137	0	8.27	0	5.44	0	2.35	0	178	0	24	0	21	0	7.6
1101	2		0	60	0	0	0	0	0	0	0	0	1	1	1	0	0	0	1	0	0	0	0	1	0	0	0	0	0	0	21.3	0	4.78	0	146	0	3.42	0	1.97	0	1.18	0	161	0	24	0	18	0	14.4
1102	4	0	1	57	0	0	0	0	0	0	0	0	1	1	2	1	0	0	1	0	0	1	5	0	0	0	0	0	0	0	30.1	1	4.64	0	151	0	4.95	0	3.23	0	1.48	0	169	0	19	0	19	0	17.8
1103	3	0	0	49	0	0	3	1	0	0	0	0	1	1	3	1	0	1	0	0	0	0	0	0	0	0	0	0	0	0	19.7	0	3.79	0	121	0	13.39	1	11.22	1	1.34	0	171	0	12	0	17	0	14.3
1104	2	0	0	43	0	0	0	0	0	0	0	0	0	0	3	1	0	1	0	0	0	0	0	0	0	0	0	0	0	0	25.1	1	4.79	0	144	0	4.12	0	1.99	0	1.75	0	199	0	389	1	121	1	18.9
1105	4	0	1	43	0	0	1	1	1	1	1	1	1	1	2	1	0	0	1	0	0	0	0	0	0	0	0	0	0	0	19.9	0	4.25	0	138	0	5.9	0	3.7	0	1.8	0	233	0	12	0	20	0	9.57
1106	3		0	60	0	0	0	0	0	0	1	1	0	0	2	1	0	0	0	1	1	1	10	0	0	0	0	0	0	1	31.2	1	4.83	0	146	0	4.16	0	2.84	0	1.07	0	146	0	55	1	38	0	407.1
1107	4		0	34	0	0	2	1	6	1	0	0	1	1	2	1	0	0	1	0	1	0	0	0	0	0	0	0	0	1	24.9	1	4.25	0	131	0	7.54	0	5.96	0	1.01	0	150	0	30	0	32	0	10.2
1108	4		0	72	1	0	0	0	6	1	0	0	1	1	1	0	0	0	0	0	0	1	10	0	0	0	0	0	0	1	23.3	0	3.86	0	114	1	6.44	0	4.8	0	1.12	0	93	0	69	1	114	1	27.1
1109	3		0	65	1	0	0	0	0	0	0	0	0	0	3	1	0	1	0	0	0	0	0	0	0	0	0	0	1	1	22.8	0	4.57	0	152	0	5.47	0	3.42	0	1.79	0	116	0	152	1	78	1	25.4
1110	4	0	0	64	0	0	0	0	0	0	2	1	0	0	2	1	0	0	1	0	0	0	0	0	1	0	0	0	0	0			4.13	0	138	0	15.1	1	12.8	1	1	0	338	1	123	1	121	1	543.2
1111	4	0	0	68	1	0	0	0	0	0	0	0	0	0	2	1	0	0	1	0	0	0	0	0	0	0	0	0	1	0	20.9	0	4.31	0	137	0	5.3	0	3.74	0	1.19	0	150	0	18	0	40	0	14.5
1112	4		1	56	0	0	2	1	0	0	0	0	1	1	2	1	0	1	0	0	0	0	0	0	1	0	0	0	0	0	28.1	1	4.03	0	127	0	6.82	0	3.96	0	2.2	0	179	0	17	0	12	0	25.8
1113	4		0	42	0	0	0	0	5	1	0	0	1	1	1	0	0	0	1	0	0	0	0	0	0	0	0	0	1	0	22.3	0	5.83	0	160	0	5.87	0	3.08	0	2.45	0	197	0	101	1	52	1	14.1
1114	3		0	67	1	0	0	0	6	1	0	0	1	1	1	0	0	0	1	0	0	0	0	0	0	0	0	0	0	0	22.2	0	4.13	0	134	0	4.39	0	2.42	0	1.63	0	162	0	13	0	18	0	8.2
1115	4		0	42	0	0	1	1	6	1	0	0	1	1	2	1	0	0	1	0	0	1	10	0	0	0	0	0	0	0	20.4	0	4.79	0	147	0	5.74	0	3.73	0	1.79	0	194	0	14	0	19	0	10.7
1116	2	0	1	72	1	0	0	0	0	0	0	0	1	1	2	1	0	0	1	1	0	0	0	1	1	0	0	0	0	0	22.4	0	3.68	0	116	1	6.39	0	3.85	0	2.32	0	145	0	11	0	15	0	10.1
1117	1		0	74	1	0	0	0	0	0	0	0	1	1	2	1	0	1	0	0	0	0	0	1	1	0	0	0	0	0	30.4	1	4.98	0	158	0	5.18	0	2.96	0	1.85	0	171	0	18	0	15	0	14.1
1118	4		1	46	0	0	1	1	0	0	0	0	1	1	2	1	0	0	1	0	0	1	6	0	1	0	1	0	0	1	22.5	0	5.28	0	159	0	9.95	0	7.68	1	1.56	0	448	1	35	0	25	0	7.4
1119	4	0	0	37	0	0	1	1	6	1	0	0	0	0	2	1	0	0	0	1	0	1	3	0	0	0	0	0	0	0	28.1	1	4.81	0	150	0	6.8	0	4.1	0	2.21	0	190	0	816	1	292	1	432.9
1120	4		0	59	0	0	0	0	0	0	0	0	1	1	2	1	0	0	1	0	0	1	20	1	0	0	0	0	0	0	22.3	0	3.86	0	125	0	8.59	0	6.34	0	1.82	0	251	0	14	0	11	0	12.3
1121	3	0	0	78	1	0	2	1	2	1	0	0	0	0	2	1	0	0	0	1	0	0	0	1	0	0	0	0	0	0	23	0	4.22	0	140	0	6.48	0	3.93	0	1.82	0	220	0	152	1	131	1	40.9
1122	4	0	1	65	1	0	2	1	6	1	0	0	1	1	2	1	0	0	1	0	0	0	0	0	0	0	0	0	0	0	23	0	3.78	0	114	1	4.3	0	2.9	0	1.1	0	151	0	13	0	13	0	12.5
1123	4	0	1	45	0	0	0	0	0	0	0	0	0	0	2	1	0	0	0	1	1	1	5	0	0	0	0	0	0	0	16.8	0	3.82	0	119	1	10.7	1	9.8	1	0.6	0	185	0	48	1	32	0	12.2
1124	4		0	51	0	0	0	0	0	0	0	0	1	1	2	1	0	0	1	0	0	1	5	0	0	0	0	0	1	1	23.1	0	2.89	1	77	1	14.29	1	10.58	1	2.52	0	405	1	21	0	20	0	6.4
1125	3		0	45	0	0	0	0	0	0	0	0	0	0	2	1	0	0	1	0	0	1	10	1	0	0	0	0	0	0	25.1	1	3.4	1	122	0	3.68	0	0.96	0	2.14	0	185	0	41	1	44	1	9.1
1126	4	0	0	62	0	0	2	1	0	0	0	0	1	1	1	0	0	0	1	0	0	0	0	1	0	0	0	0	1	1	24.6	1	4.77	0	145	0	5.87	0	3.66	0	1.79	0	164	0	34	0	35	0	20.8
1127	4	0	1	59	0	0	0	0	0	0	0	0	0	0	3	1	0	0	1	1	1	0	0	1	0	0	0	0	0	0			2.41	1	82	1	3.7	0	2.9	0	0.8	0	145	0	620	1	577	1	537.6
1128	3		1	45	0	0	0	0	0	0	0	0	0	0	2	1	0	0	1	0	1	0	0	1	0	0	0	0	0	0	26	1	3.42	1	80	1	11.3	1	9.49	1	1.03	0	268	0	5	0	6	0	5.4
1129	4	0	0	63	0	0	0	0	6	1	0	0	1	1	2	1	0	0	0	1	0	0	0	0	0	0	0	0	0	0	20.1	0
1130	4	0	0	59	0	0	2	1	0	0	0	0	1	1	3	1	0	0	1	0	1	1	10	1	0	0	0	0	1	0	22.6	0	4.32	0	140	0	11.01	1	9.83	1	0.86	0	108	0	41	1	43	1	15.1
1131	4		1	54	0	0	0	0	0	0	0	0	1	1	3	1	0	0	1	0	0	0	0	0	0	0	1	0	0	0			4.4	0	134	0	9.79	0	5.62	0	3.45	0	212	0	51	1	51	1	32.7
1132	4		0	55	0	0	0	0	0	0	0	0	1	1	3	1	0	0	1	0	0	0	0	0	0	0	0	0	0	0	20.1	0
1133	4		1	37	0	0	1	1	2	1	4	1	1	1	3	1	0	0	1	0	0	1	5	0	0	0	0	0	0	0	18	0	3.86	0	113	1	10.46	1	7.49	0	1.72	0	190	0	23	0	21	0	9
1134	4	0	1	70	1	0	0	0	0	0	0	0	1	1	1	0	0	0	1	0	0	1	4	1	1	0	0	0	0	0	30.4	1	3.52	0	120	0	8.83	0	6.15	0	2.18	0	233	0	17	0	25	0	11.2
1135	2		1	54	0	0	0	0	0	0	0	0	1	1	2	1	0	0	1	1	0	0	0	0	0	1	0	0	0	1	20.3	0	4.49	0	129	0	4.9	0	3.6	0	1.1	0	224	0	76	1	207	1	496.9
1136	2	1	1	66	1	0	0	0	6	1	0	0	1	1	2	1	0	0	1	1	0	0	0	0	0	0	0	0	0	0	27.4	1	3.91	0	120	0	7.24	0	4.1	0	2.11	0	233	0	214	1	166	1	203.7
1137	3		1	49	0	0	0	0	0	0	0	0	0	0	2	1	0	0	1	0	0	0	0	0	0	0	0	0	0	0	23.4	0	4.16	0	132	0	3.88	0	2.3	0	1.21	0	101	0	16	0	16	0	7.4
1138	2	0	0	72	1	1	1	1	0	0	0	0	1	1	3	1	0	0	1	0	0	0	0	1	1	0	1	0	0	0	27.4	1
1139	4	0	0	69	1	0	0	0	0	0	0	0	1	1	2	1	0	0	1	0	1	1	5	1	1	0	1	0	1	1	22.1	0	4.77	0	151	0	12.55	1	11.56	1	0.68	0	183	0	98	1	91	1	21.4
1140	3	0	0	63	0	0	0	0	0	0	0	0	1	1	2	1	0	0	1	0	0	0	0	1	1	0	0	0	0	0	21.8	0	4.51	0	146	0	6.93	0	3.61	0	2.84	0	297	0	25	0	20	0	7
1141	3	0	1	69	1	0	0	0	6	1	0	0	1	1	2	1	0	0	1	0	0	1	5	0	0	0	0	0	0	0	19.7	0	4.39	0	140	0	6.21	0	3.55	0	2.19	0	152	0	10	0	16	0	15.7
1142	3		1	66	1	0	0	0	0	0	0	0	1	1	1	0	0	0	1	0	0	0	0	0	1	0	0	0	0	0			3.98	0	117	1	6.4	0	4.9	0	1.1	0	160	0	15	0	12	0	12.9
1143	4	0	1	74	1	0	0	0	0	0	0	0	1	1	2	1	0	0	1	1	0	0	0	0	0	0	0	0	1	0	20.3	0	4.73	0	152	0	5.63	0	3.42	0	2.05	0	198	0	280	1	223	1	168.7
1144	2		0	60	0	0	0	0	6	1	0	0	1	1	2	1	0	0	0	1	0	0	0	0	1	0	0	0	0	0	23.1	0	4.47	0	142	0	5.74	0	3.96	0	1.54	0	176	0	11	0	13	0	16.6
1145	4	0	0	44	0	0	1	1	0	0	0	0	1	1	0	1	0	0	1	0	0	1	5				0	0			25.2	1	4.42	0	130	0	9.8	0	8.3	1	1.2	0	119	0	18	0	21	0	11.89
1146	2	0	0	73	1	0	0	0	1	1	0	0	1	1	1	0	0	0	1	0	0	1	5	0	1	0	0	0	0	0	23.6	0	4.57	0	137	0	7.76	0	5.56	0	1.19	0	192	0	13	0	16	0	10.4
1147	3		0	71	1	0	0	0	0	0	0	0	0	0	2	1	0	0	1	1	0	0	0	0	0	0	0	0	0	0	22.3	0	4.88	0	151	0	6.79	0	3.61	0	2.86	0	139	0	14	0	18	0	20.8
1148	3	0	1	72	1	0	0	0	0	0	0	0	1	1	1	0	0	0	1	0	0	1	4	0	1	0	0	0	0	0	25.6	1	4.09	0	134	0	5.33	0	2.45	0	2.45	0	183	0	14	0	13	0	17
1149	3	1	0	51	0	0	3	1	0	0	0	0	1	1	2	1	0	0	1	0	0	1	10	0	0	0	1	0	1	1	32.8	1	4.77	0	143	0	13.23	1	9.75	1	2.1	0	208	0	118	1	45	1	14.9
1150	4		1	76	1	0	0	0	0	0	0	0	0	0	3	1	0	0	1	0	0	1	7	0	0	0	0	0	0	0	17.1	0	4.36	0	139	0	10.11	1	7.53	1	2.1	0	116	0	14	0	14	0	5.7
1151	2	0	0	56	0	0	0	0	0	0	0	0	1	1	1	0	0	0	1	0	1	1	4	0	0	0	0	0	1	0	18	0	4.45	0	146	0	5.16	0	2.46	0	2.06	0	249	0	68	1	58	1	233.7
1152	4		0	67	1	0	2	1	0	0	0	0	1	1	2	1	0	0	1	0	0	0	0	0	0	0	0	0	1	1	19.5	0	3.39	1	115	1	7.59	0	4.84	0	1.77	0	171	0	52	1	88	1	26.9
1153	3	0	0	53	0	0	0	0	0	0	0	0	1	1	3	1	0	0	1	0	0	1	5	0	0	0	1	0	1	1	24.2	1	4.34	0	133	0	4.15	0	2.42	0	1.46	0	127	0	105	1	130	1	326.3
1154	3	0	1	75	1	0	0	0	1	1	0	0	1	1	2	1	0	0	1	0	1	1	10	1	0	0	0	0	0	0	19.5	0	4.24	0	134	0	4.68	0	3.09	0	1.21	0	104	0	7	0	11	0	11.5
1155	4	0	1	64	0	0	0	0	0	0	0	0	0	0	2	1	0	0	1	0	0	1	5	0	1	0	0	0	0	0	25.1	1
1156	4		1	65	1	0	2	1	0	0	0	0	1	1	1	0	0	1	0	0	0	0	0	1	0	0	1	0	0	0	21.1	0	3.96	0	120	0	8.87	0	7.3	0	1.21	0	166	0	107	1	192	1	16.2
1157	4	0	1	71	1	0	0	0	2	1	0	0	1	1	1	0	0	0	0	0	0	1	7.5	0	1	0	0	0	0	0	19.5	0													45	1	73	1	18.7
1158	4	0	1	60	0	0	0	0	6	1	0	0	1	1	1	0	0	0	1	0	0	0	0	0	0	0	0	0	0	0	16.9	0	4.22	0	127	0	3.79	0	2.61	0	0.94	0	190	0	11	0	15	0	7
1159	1	0	1	67	1	0	0	0	0	0	0	0	0	0	3	1	0	0	0	0	0	1	5	0	0	1	0	0	0	0	18.7	0	4.13	0	129	0	6.54	0	3.8	0	2.16	0	208	0	14	0	21	0	8.4
1160	3	0	0	52	0	0	0	0	2	1	0	0	0	0	2	1	0	0	0	0	0	1	4	0	0	0	1	0	0	0	24.5	1
1161	4		1	33	0	0	0	0	6	1	0	0	1	1	1	0	0	0	1	0	0	0	0	0	0	0	0	0	0	0	20	0													18	0	20	0	9.8
1162	1	1	0	45	0	0	1	1	1	1	4	1	0	0	3	1	0	0	1	0	0	0	0	0	0	0	0	0	0	0	22.4	0	5	0	151	0	4.6	0	3.4	0	1	0	84	0	28	0	19	0	6.3
1163	2		1	44	0	0	0	0	0	0	0	0	0	0	3	1	0	0	1	0	0	1	2	0	0	0	0	0	0	0	18.7	0	3.79	0	75	1	3.97	0	2.45	0	1.15	0	118	0	11	0	17	0	6
1164	3		0	48	0	0	0	0	0	0	0	0	0	0	2	1	0	1	0	0	0	0	0	0	0	0	0	0	0	1	18.8	0	4.54	0	151	0	6.15	0	3.69	0	1.26	0	149	0	555	1	424	1	137.6
1165	4	0	1	79	1	0	2	1	2	1	0	0	1	1	1	0	0	0	1	0	0	0	0	0	0	0	0	0	0	0	21.3	0	3.84	0	114	1	5.4	0	3.35	0	1.52	0	194	0	36	0	47	1	9.8
1166	3	0	0	45	0	0	0	0	0	0	0	0	1	1	1	0	0	0	0	0	0	1	10	0	0	0	0	0	0	0	25.9	1	4.47	0	133	0	4.92	0	3.1	0	1.3	0	107	0	49	1	86	1	9.3
1167	3	0	1	53	0	0	0	0	0	0	0	0	1	1	1	0	0	0	1	0	0	1	2	0	0	0	0	0	0	0	22.4	0	3.88	0	119	1	3.55	0	2.2	0	1.23	0	114	0	9	0	15	0	9.3
1168	4	0	1	58	0	0	0	0	6	1	0	0	0	0	3	1	0	0	1	1	0	1	10	0	1	0	0	0	0	0
1169	4		0	57	0	0	0	0	0	0	0	0	1	1	1	0	0	0	0	1	0	0	0	1	0	0	0	0	0	0	21.1	0	4.17	0	129	0	8.77	0	6.54	0	1.01	0	250	0	104	1	72	1	582.1
1170	3	0	0	58	0	0	0	0	0	0	2	1	1	1	2	1	0	0	0	1	0	1	11	0	0	0	0	0	1	1			4.11	0	126	0	4.38	0	2.79	0	1.18	0	261	0	92	1	52	1	187
1171	4		0	46	0	0	0	0	1	1	0	0	1	1	1	0	0	0	0	1	0	0	0	1	0	0	0	0	1	1	18.8	0	3.94	0	118	1	29.5	1	28.4	1	0.6	0	243	0	17	0	28	0	159.4
1172	4	0	1	59	0	0	2	1	0	0	0	0	0	0	2	1	0	0	0	0	0	1	5	1	1	0	0	0	0	0	33.7	1	4.84	0	147	0	8.5	0	5.9	0	2.2	0	220	0	18	0	19	0	19.3
1173	4	0	0	81	1	0	3	1	0	0	0	0	1	1	1	0	0	0	0	0	0	1	5	0	1	0	0	0	0	0			3.42	1	105	1	4.38	0	2.49	0	1.43	0	233	0	6	0	16	0	7.8
1174	3		0	68	1	0	0	0	0	0	0	0	1	1	1	0	0	0	1	0	0	1	2	0	0	0	0	0	0	0	24.1	1	4.49	0	143	0	4.22	0	2.85	0	0.96	0	170	0	13	0	18	0	10.3
1175	4	0	0	49	0	0	1	1	0	0	0	0	0	0	3	1	0	0	1	0	0	1	5	0	0	0	0	0	1	1	21.6	0	4.77	0	156	0	15.1	1	11.1	1	3.3	0	126	0	36	0	20	0	9.01
1176	3		1	40	0	0	0	0	0	0	0	0	1	1	1	0	0	0	1	1	0	0	0	0	0	0	0	0	0	0	18.4	0	4.04	0	117	1	4.53	0	2.85	0	1.44	0	142	0	13	0	18	0	7.7
1177	3		0	36	0	0	0	0	6	1	0	0	1	1	1	0	0	0	1	1	0	0	0	0	0	0	0	0	0	0	18.7	0	4.15	0	130	0	8.45	0	4.72	0	2.27	0	328	1	101	1	47	1	434.1
1178	4		1	53	0	0	0	0	0	0	1	1	1	1	1	0	0	0	1	0	1	0	0	1	0	1	1	0	0	0	21.3	0	3.53	0	106	1	8.7	0	6.9	0	1.2	0	255	0	51	1	136	1	18.5
1179	4	0	0	60	0	0	0	0	0	0	0	0	1	1	2	1	0	0	0	0	0	1	5	1	0	0	1	0	0	0	25.9	1	4.73	0	142	0	3.85	0	2.06	0	1.43	0	85	0	12	0	12	0	23.7
1180	4		0	52	0	0	0	0	6	1	1	1	0	0	2	1	0	0	0	1	0	0	0	0	0	0	0	0	0	0	21.5	0	4.41	0	149	0	6.56	0	3.21	0	2.91	0	235	0	12	0	14	0	11.1
1181	4		0	64	0	0	0	0	2	1	0	0	1	1	1	0	0	0	1	0	0	1	5	0	0	0	0	0	0	0	24.7	1	4.59	0	150	0	6.2	0	4.12	0	1.83	0	240	0	14	0	14	0	24.5
1182	3	0	1	57	0	0	1	1	0	0	0	0	1	1	2	1	0	0	1	0	0	1	10	0	0	0	0	0	0	0	20.3	0	4.11	0	115	1	3.9	0	2.3	0	1.2	0	198	0	13	0	18	0	8.5
1183			0	58	0	0	0	0	6	1	0	0	1	1	1	0	0	0	0	1	1	1	15	0	0	0	0	0	0	0	21.6	0	3.78	0	120	0	9.02	0	6.08	0	2.5	0	314	1	330	1	156	1	460.7
1184	4	1	0	72	1	0	0	0	0	0	0	0	1	1	1	0	0	0	0	0	0	1	5	0	0	0	0	0	0	0	22.5	0	3.6	0	105	1	7.61	0	5.25	0	1.94	0	260	0	16	0	16	0	6.4
1185	3		1	56	0	0	0	0	0	0	0	0	0	0	2	1	0	0	1	0	0	1	25	1	0	0	0	0	0	0	21.5	0	3.87	0	118	1	3.99	0	1.85	0	2	0	215	0	15	0	19	0	17.2
1186	2		0	69	1	0	0	0	6	1	0	0	1	1	1	0	0	1	0	0	0	0	0	0	0	0	0	0	0	0	25.6	1	4.83	0	152	0	8.16	0	6.81	0	1.16	0	160	0	20	0	21	0	20.5
1187	4		1	63	0	0	0	0	0	0	0	0	1	1	0	1	0	0	1	0	0	1	1	0	1	0	1	0	0	0	23.9	0	3.62	0	107	1	7.5	0	6.3	0	0.8	0	152	0	15	0	21	0	15
1188	4		0	60	0	0	0	0	0	0	0	0	0	0	3	1	0	0	1	0	0	0	0	0	0	0	0	0	0	0	21.9	0	4.84	0	158	0	5.27	0	3.05	0	1.87	0	155	0	28	0	28	0	10.2
1189	4		1	65	1	0	2	1	0	0	0	0	1	1	3	1	0	1	0	0	0	0	0	0	0	0	0	0	0	0	28.3	1	4.51	0	146	0	7.6	0	5.63	0	1.56	0	183	0	16	0	20	0	11.2
1190	4	0	0	50	0	0	0	0	6	1	0	0	1	1	1	0	0	0	0	0	0	1	10	1	0	0	0	0	1	1	30.7	1	4.86	0	154	0	6.74	0	4.55	0	1.76	0	164	0	17	0	21	0	18.6
1191	3	0	1	69	1	0	0	0	2	1	0	0	1	1	2	1	0	0	1	1	0	1	6	0	0	0	0	0	0	0	25.2	1	4.03	0	127	0	4.87	0	2.2	0	2.27	0	82	0	19	0	20	0	10.3
1192	3		0	64	0	0	0	0	6	1	0	0	1	1	1	0	0	0	1	0	0	0	0	1	0	0	0	0	0	0	22.9	0	4.72	0	157	0	5.18	0	3.17	0	1.4	0	171	0	33	0	26	0	22.7
1193	2		0	62	0	0	0	0	6	1	0	0	1	1	1	0	0	0	1	0	0	1	5	0	1	0	0	0	1	1	23.1	0	4.51	0	147	0	7.82	0	5.08	0	2.17	0	235	0	16	0	19	0	2.8
1194	1		0	45	0	0	0	0	0	0	0	0	1	1	2	1	0	0	0	1	0	0	0	0	0	0	1	0	0	0	28.4	1	4.38	0	133	0	6.81	0	4.36	0	1.71	0	245	0	299	1	216	1	347
1195	1		0	32	0	0	0	0	0	0	0	0	0	0	3	1	0	0	1	0	0	0	0	0	0	0	0	0	0	0	20.8	0	5.36	0	161	0	4.42	0	2.6	0	1.34	0	226	0	535	1	241	1	75.1
1196	4		0	59	0	0	0	0	0	0	0	0	1	1	1	0	0	1	0	0	0	0	0	1	0	0	0	0	0	0	31.9	1	4.62	0	146	0	7.13	0	5.1	0	1.67	0	196	0	20	0	15	0	17.6
1197	3	0	1	70	1	0	0	0	0	0	1	1	0	0	2	1	0	0	1	1	0	0	0	1	0	0	0	0	0	0	18.7	0	3.68	0	113	1	4.34	0	2.54	0	0.93	0	235	0	10	0	15	0	6.2
1198	3	0	0	45	0	0	0	0	0	0	0	0	1	1	2	1	0	0	1	1	0	1	15	0	1	0	1	0	0	0	19.4	0	3.61	0	122	0	7.42	0	4.38	0	2.48	0	277	0	71	1	38	0	472.8
1199	3		1	68	1	0	0	0	6	1	0	0	1	1	1	0	0	0	1	0	0	0	0	0	0	0	0	0	0	0	27.8	1	3.97	0	124	0	5.77	0	2.98	0	2.53	0	209	0	17	0	15	0	8.4
1200	4		1	55	0	0	1	1	0	0	0	0	0	0	3	1	0	0	1	0	0	1	10	0	0	0	1	0	0	0	19.5	0													21	0	17	0	10.8
1201	3	0	0	63	0	0	0	0	0	0	0	0	0	0	2	1	0	0	1	0	1	1	5	0	0	0	0	0	0	0	21.7	0	4.69	0	149	0	4.87	0	3.27	0	0.83	0	190	0	18	0	27	0	12.9
1202	3		1	52	0	0	0	0	0	0	0	0	0	0	3	1	0	0	0	1	1	1	10	0	0	0	0	0	0	0	18.8	0	2.8	1	102	1	4.11	0	2.84	0	1.01	0	210	0	316	1	309	1	398
1203			0	65	1	0	0	0	2	1	0	0	1	1	1	0	0	0	1	0	0	1	10	0	1	0	0	0	1	1	23.5	0													20	0	23	0
1204	3	0	1	76	1	0	0	0	2	1	0	0	1	1	2	1	0	0	1	0	0	1	5	0	0	0	0	0	0	0	18.7	0	4.32	0	135	0	6.93	0	4.64	0	1.87	0	205	0	46	1	22	0	18
1205	4	0	1	73	1	0	0	0	0	0	0	0	0	0	2	1	0	0	0	1	0	0	0	0	1	0	0	0	0	0	25.8	1	3.54	0	120	0	4.4	0	2.22	0	1.65	0	278	0	189	1	150	1	491.3
1206	2		0	40	0	0	0	0	6	1	0	0	0	0	3	1	0	0	1	1	0	0	0	0	0	0	0	0	0	0	29.4	1	4.48	0	147	0	9.08	0	4.9	0	1.94	0	250	0	223	1	166	1	627.5
1207	2	0	0	52	0	0	0	0	0	0	0	0	0	0	2	1	0	0	1	1	1	1	10	0	1	0	1	0	1	1	21.6	0	4.85	0	160	0	7.38	0	4.52	0	2.36	0	301	1	78	1	35	0	679
1208	4		1	72	1	0	2	1	2	1	0	0	0	0	2	1	0	0	1	0	0	0	0	0	1	0	0	0	0	0	27	1	4.3	0	144	0	9.65	0	4.96	0	4.16	1	233	0	38	0	36	0	29.3
1209	4	0	0	48	0	0	2	1	0	0	0	0	1	1	2	1	0	0	1	0	1	1	10	0	0	0	0	0	1	1	21.4	0	4.63	0	141	0	6.97	0	4.73	0	1.59	0	230	0	104	1	53	1	362.3
1210	4		1	57	0	0	2	1	6	1	0	0	1	1	1	0	0	1	0	0	0	0	0	0	0	0	0	0	0	0	22.3	0	3.06	1	101	1	4.2	0	3.3	0	0.6	0	110	0	52	1	45	1	15.2
1211	4		0	47	0	0	0	0	2	1	0	0	1	1	1	0	0	0	1	0	0	0	0	0	0	0	0	0	0	0	22.1	0	4.97	0	158	0	6.5	0	4.5	0	1.6	0	219	0	34	0	22	0	18.9
1212	4		0	43	0	0	0	0	5	1	0	0	1	1	1	0	0	0	1	0	0	1	14	0	0	0	0	0	0	0	19.6	0	4.81	0	149	0	4.93	0	3.28	0	1.28	0	97	0	14	0	17	0	8.4
1213	4	0	0	52	0	0	0	0	0	0	0	0	1	1	2	1	0	0	1	0	0	0	0	0	0	0	0	0	1	1	22.5	0	5.03	0	158	0	5.6	0	3.6	0	1.6	0	277	0	14	0	19	0	9.3
1214	3	0	0	55	0	0	0	0	0	0	0	0	0	0	3	1	0	0	0	1	0	1	12	0	0	0	1	0	1	1	25.3	1	4.83	0	155	0	6.38	0	4.45	0	1.48	0	222	0	45	1	18	0	742.9
1215	2		1	61	0	1	0	0	6	1	0	0	1	1	0	1	0	0	1	0	0	1	4	0	0	0	1	0	0	0	25.4	1	4.18	0	122	0	12.3	1	9.32	1	1.76	0	312	1	36	0	29	0	5.6
1216	4	0	0	63	0	0	0	0	6	1	0	0	1	1	1	0	0	1	0	0	0	0	0	0	0	0	0	0	1	1	20.8	0	4.37	0	145	0	4.82	0	2.78	0	1.59	0	139	0	23	0	25	0	13.4
1217	3	0	1	83	1	0	0	0	6	1	0	0	1	1	1	0	0	1	0	0	0	0	0	0	0	0	0	0	0	0	17.8	0	3.02	1	100	1	3.08	0	1.86	0	0.95	0	117	0	137	1	116	1	51.1
1218	3		0	49	0	0	0	0	6	1	0	0	1	1	1	0	0	0	1	0	1	1	4	0	1	0	0	0	0	0	24.8	1	3.18	1	96	1	5.42	0	4.04	0	1.15	0	115	0	14	0	16	0	8
1219	4		0	81	1	0	2	1	0	0	0	0	1	1	1	0	0	0	0	0	0	1	17	1	0	0	0	0	0	0	19.9	0	3.68	0	114	1	4.95	0	3.23	0	1.14	0	121	0	11	0	17	0	10.5
1220	1		1	68	1	0	2	1	2	1	0	0	1	1	1	0	0	0	0	1	0	1	3	0	0	0	0	0	0	0	24.3	1	3.72	0	123	0	6	0	3.5	0	2.1	0	232	0	20	0	24	0	26.1
1221	4	0	0	45	0	0	0	0	6	1	0	0	1	1	1	0	0	0	1	0	0	0	0	0	0	0	1	0	1	0	22.5	0	4.52	0	150	0	5.3	0	3.6	0	1.2	0	193	0	138	1	140	1	11.1
1222	3	1	0	55	0	0	0	0	0	0	0	0	1	1	2	1	0	1	0	0	0	0	0	1	1	1	0	0	0	0	24.2	1	3.85	0	124	0	7.97	0	5.46	0	1.95	0	199	0	17	0	15	0	12.2
1223	3		0	64	0	0	0	0	0	0	0	0	1	1	1	0	0	0	1	0	0	0	0	0	1	0	0	0	1	1	24.2	1	5.06	0	157	0	8.15	0	5.21	0	2.44	0	243	0	17	0	19	0	19.2
1224	4	0	0	64	0	0	0	0	0	0	0	0	1	1	2	1	0	0	0	1	0	1	4	1	0	0	0	0	0	0	19.6	0	3.91	0	129	0	5.71	0	3.51	0	1.81	0	135	0	88	1	39	0	316.1
1225	3		1	56	0	0	0	0	6	1	0	0	0	0	3	1	0	0	1	1	0	1	3	0	1	0	0	0	0	0			4.46	0	132	0	5.7	0	5.6	0	0.1	0	195	0	254	1	187	1	101.1
1226	4	0	1	59	0	0	0	0	0	0	0	0	1	1	1	0	0	0	1	0	0	0	0	0	0	0	0	0	0	0	22.4	0	5.07	0	150	0	6.91	0	4.72	0	1.83	0	141	0	73	1	43	1	14
1227	3		0	73	1	0	0	0	6	1	0	0	1	1	1	0	0	0	1	1	0	0	0	0	0	0	0	0	0	1	22.4	0	3.99	0	113	1	4.91	0	3.19	0	0.96	0	150	0	56	1	42	1	409.1
1228	4	0	1	64	0	0	0	0	0	0	0	0	1	1	2	1	0	1	0	0	0	0	0	0	0	0	0	0	0	0	19.1	0	3.83	0	121	0	4.77	0	3.27	0	1.01	0	96	0	12	0	25	0	8.4
1229	1	1	1	65	1	0	0	0	2	1	0	0	1	1	1	0	0	0	0	1	0	0	0	0	0	0	1	1	0	0	25.3	1	3.88	0	118	1	6.59	0	4.11	0	1.96	0	329	1	137	1	94	1	12.9
1230	3		1	68	1	0	0	0	0	0	0	0	1	1	1	0	0	0	0	1	0	0	0	0	0	0	1	0	0	0	22.6	0	3.58	0	118	1	4.14	0	2.96	0	0.88	0	167	0	279	1	195	1	211.1
1231	4	0	0	60	0	0	2	1	6	1	0	0	1	1	3	1	0	0	1	0	0	0	0	0	0	0	0	0	1	1	24.2	1	3.34	1	108	1	7.37	0	3.86	0	2.78	0	79	0	31	0	24	0	20.1
1232	3		0	46	0	0	0	0	6	1	0	0	1	1	2	1	0							0	0	0	0	0	0	0	26.4	1	4.84	0	140	0	6.17	0	4.34	0	1.59	0	219	0	14	0	18	0	11.8
1233	3		1	50	0	0	0	0	6	1	0	0	1	1	2	1	0	0	1	1	0	0	0	0	0	0	0	0	0	0	24.2	1	3.87	0	116	1	7.6	0	5.9	0	1.4	0	280	0	388	1	189	1	427.3
1234	3	0	0	50	0	0	0	0	0	0	0	0	0	0	2	1	0	0	0	1	0	1	2	0	1	0	0	0	1	1	29.1	1	4.21	0	135	0	5.93	0	3.43	0	1.96	0	273	0	33	0	24	0	36.7
1235	4	0	0	40	0	0	2	1	0	0	0	0	1	1	1	0	0	0	1	0	0	0	0	0	0	0	0	0	0	1	26.8	1	4.07	0	125	0	6.13	0	4.39	0	1.02	0	180	0	95	1	78	1	20.7
1236	4	0	0	67	1	0	0	0	0	0	0	0	1	1	1	0	0	0	1	1	0	0	0	0	0	0	0	0	1	0	20	0	4.41	0	135	0	5.24	0	3.92	0	0.98	0	224	0	237	1	179	1	31.7
1237	4		0	66	1	0	0	0	0	0	0	0	0	0	2	1	0	0	1	0	0	1	25	0	0	1	1	0	0	0	25.6	1	5.06	0	158	0	5.53	0	3.28	0	1.78	0	215	0	117	1	167	1	160.6
1238	3		0	53	0	0	0	0	0	0	0	0	1	1	1	0	0	0	1	0	0	0	0	0	0	0	0	0	0	0	24.2	1	5.58	0	150	0	6.75	0	3.94	0	2.19	0	153	0	27	0	19	0	15
1239	4		1	50	0	0	0	0	2	1	0	0	1	1	2	1	0	0	1	0	0	1	5	0	0	0	1	0	1	1	19.8	0	4.42	0	139	0	6.42	0	4.19	0	1.37	0	222	0	88	1	70	1	28.5
1240	2	0	1	61	0	0	0	0	6	1	0	0	1	1	2	1	0	0	1	1	1	1	5	1	0	0	0	0	0	0	21.8	0	3.9	0	126	0	7.74	0	4.99	0	2.08	0	271	0	254	1	131	1	357.9
1241	1		0	60	0	0	0	0	6	1	0	0	1	1	1	0	0	0	0	1	0	0	0	0	0	0	0	0	1	1	23.5	0	4.09	0	136	0	5.58	0	3.63	0	1.43	0	200	0	176	1	76	1	140.9
1242	4		1	42	0	0	0	0	0	0	0	0	1	1	2	1	0	0	0	0	1	1	5	0	0	0	0	0	0	0	20.9	0	4.25	0	141	0	9.9	0	8	1	1.1	0	272	0	83	1	48	1	112.3
1243	3	0	0	81	1	0	0	0	0	0	0	0	0	0	2	1	0	0	0	1	0	0	0	0	0	0	1	0	1	0	16.9	0	3.07	1	105	1	4.3	0	2.74	0	1.11	0	149	0	203	1	137	1	416.1
1244	1	1	0	59	0	0	0	0	0	0	0	0	1	1	1	0	0	0	0	1	1	0	0	0	0	0	0	0	0	0	22.2	0	4.25	0	134	0	4.51	0	2.55	0	1.27	0	253	0	482	1	386	1	120.5
1245	3	0	0	72	1	0	0	0	0	0	0	0	1	1	1	0	0	0	1	0	0	0	0	0	0	0	0	0	1	1	21.3	0	4.71	0	152	0	5.6	0	3.67	0	1.44	0	108	0	15	0	17	0	8.9
1246	3		1	56	0	0	0	0	6	1	0	0	0	0	3	1	0	0	1	1	0	0	0	0	0	0	0	0	0	0	26.6	1	4.06	0	137	0	4.87	0	2.93	0	1.64	0	248	0	17	0	16	0	14.3
1247	4	0	0	50	0	0	0	0	2	1	0	0	1	1	2	1	0	0	1	0	0	1	10	0	0	0	0	0	1	1	16.1	0	3.93	0	116	1	4.05	0	2.65	0	1.12	0	125	0	10	0	18	0	7.6
1248	4	0	1	47	0	0	1	1	0	0	0	0	1	1	1	0	0	0	1	0	0	0	0	0	0	0	1	0	1	0	24.4	1
1249	1		1	45	0	0	0	0	0	0	0	0	0	0	3	1	0	0	0	1	0	1	22	0	0	0	1	0	1	1	33.7	1	4.87	0	150	0	7.6	0	4.98	0	1.75	0	234	0	16	0	15	0	13
1250	3	0	1	66	1	0	0	0	0	0	0	0	1	1	2	1	0	0	1	1	0	1	4	1	0	0	0	0	0	0	22.7	0	3.76	0	123	0	4.12	0	2.22	0	1.67	0	148	0	122	1	135	1	120.4
1251	3	0	1	61	0	0	0	0	6	1	0	0	1	1	0	1	0	0	1	0	1	0	0	1	1	0	0	0	0	0	28.6	1	4.52	0	137	0	4.1	0	1.87	0	1.97	0	150	0	23	0	19	0	11.6
1252	4		1	58	0	0	0	0	0	0	0	0	1	1	2	1	0	0	0	1	1	0	0	0	0	0	0	0	0	0	18.3	0	3.95	0	118	1	3.1	0	1.73	0	1.03	0	152	0	307	1	160	1	162.7
1253	1	1	0	50	0	0	0	0	6	1	0	0	1	1	2	1	0	0	1	0	0	0	0	0	1	0	0	0	1	1	26	1	4.64	0	158	0	8.83	0	6.38	0	1.69	0	215	0	24	0	18.9	0	5.9
1254			0	77	1	0	2	1	0	0	0	0	1	1	2	1	0	0	0	1	1	0	0	0	0	0	0	0	0	0	21.1	0	3.38	1	113	1	7.27	0	5.64	0	1.24	0	161	0	46	1	53	1	408.2
1255			1	37	0	0	2	1	4	1	0	0	1	1	1	0	0	0	1	0	0	0	0	0	0	0	0	0	0	0	19.6	0	4.28	0	130	0	6.1	0	3	0	2.37	0	132	0	26	0	23	0	3.6
1256	4	0	1	48	0	0	0	0	0	0	0	0	1	1	2	1	0	0	1	0	0	0	0	0	0	0	0	0	0	0	28.7	1	4.1	0	124	0	4.01	0	2.72	0	1.05	0	136	0	39	0	61	1	18.3
1257	3		0	40	0	0	1	1	6	1	0	0	2		3	1	0	0	0	1	0	0	0	0	0	0	0	0	0	0	26.8	1	3.95	0	115	1	6.6	0	4.1	0	1.9	0	199	0	28	0	24	0	16.5
1258	4		0	47	0	0	2	1	3	1	0	0	1	1	1	0	0	1	0	0	0	0	0	0	0	0	0	0	0	0	26.4	1	4.39	0	132	0	10.7	1	8	1	1.7	0	244	0	58	1	81	1	20.2
1259	4		0	78	1	0	2	1	6	1	0	0	1	1	1	0	0	0	1	0	0	0	0	0	1	0	0	0	0	0	22.6	0	3.97	0	126	0	9.28	0	6.85	0	1.6	0	144	0	19	0	27	0	11.2
1260	3		1	62	0	0	0	0	0	0	0	0	1	1	1	0	0	0	1	1	0	0	0	0	0	0	0	0	0	0	23.1	0	3.7	0	113	1	3.66	0	2.41	0	0.96	0	185	0	407	1	457	1	48.3
1261	3		0	61	0	0	0	0	0	0	0	0	1	1	2	1	0	0	1	0	0	1	15	0	0	0	0	0	0	0	21.5	0	4.05	0	130	0	8.21	0	3.76	0	3.81	0	179	0	17	0	15	0	9.1
1262	1	0	1	56	0	0	0	0	0	0	0	0	1	1	2	1	0	0	1	0	0	1	7	0	0	0	0	0	0	0	22.6	0	4.05	0	116	1	6.29	0	4.18	0	1.62	0	235	0	14	0	16	0	8.6
1263	3		0	74	1	0	0	0	2	1	0	0	1	1	1	0	0	0	0	1	0	1	2	0	0	0	0	0	0	0	21.9	0	3.68	0	117	1	7.86	0	5.43	0	1.63	0	248	0	76	1	87	1	549.6
1264	3	0	0	60	0	0	0	0	6	1	0	0	0	0	2	1	0	0	0	1	0	0	0	0	0	0	0	0	0	0	19.6	0	3.35	1	105	1	6.5	0	3.71	0	2.22	0	272	0	219	1	121	1	380.5
1265	3	0	1	61	0	0	0	0	6	1	0	0	0	0	3	1	0	0	1	1	1	0	0	0	0	0	0	0	0	0	19.7	0	3.48	1	113	1	4.81	0	2.95	0	1.54	0	238	0	397	1	265	1	303.1
1266	2		1	65	1	0	0	0	2	1	0	0	1	1	1	0	0	0	1	0	0	0	0	0	0	0	0	0	0	0	19.5	0	4.01	0	124	0	3.82	0	1.96	0	1.58	0	115	0	10	0	21	0	9.1
1267	4		1	55	0	0	0	0	1	1	0	0	2		3	1	0	0	1	1	0	0	0	0	0	0	0	0	0	0	18.8	0	3.41	1	95	1	5.7	0	4.5	0	1.1	0	202	0	31	0	32	0	17.68
1268	4	0	1	41	0	0	0	0	2	1	0	0	0	0	3	1	0	0	1	0	0	1	20	0	0	0	0	0	0	0	18.7	0	3.38	1	100	1	4.24	0	3.05	0	0.74	0	131	0	22	0	18	0	8.7
1269	4	0	1	56	0	0	0	0	0	0	0	0	1	1	1	0	0	0	1	0	0	1	10	0	0	0	0	0	0	0	21.6	0	3.68	0	102	1	4.21	0	2.1	0	1.73	0	221	0	8	0	15	0	5.8
1270	3		0	52	0	0	0	0	6	1	0	0	1	1	1	0	0	0	1	0	0	1	5	1	0	0	0	0	1	0	24.8	1	3.83	0	124	0	4.32	0	2.47	0	1.17	0	130	0	12	0	11	0	6.7
1271	3	1	1	59	0	0	0	0	6	1	0	0	2		3	1	0	0	1	0	0	1	15	0	0	0	1	0	0	0	20.5	0	4.93	0	145	0	5.8	0	3.66	0	1.45	0	142	0	22	0	17	0	13.9
1272	3	0	1	54	0	0	0	0	4	1	0	0	0	0	2	1	0	0	1	1	0	1	5	0	0	0	0	0	0	0	22.7	0	3.96	0	127	0	6.98	0	4.05	0	1.93	0	263	0	328	1	136	1	195.2
1273	1		0	56	0	0	0	0	1	1	0	0	0	0	2	1	0	0	1	1	0	0	0	0	0	0	0	0	0	0	20.6	0	4.57	0	146	0	6.16	0	4.32	0	1.36	0	176	0	445	1	231	1	221.7
1274	3		1	48	0	0	0	0	2	1	0	0	1	1	1	0	0	0	1	0	0	0	0	0	0	0	0	0	0	0	28.7	1	4.3	0	129	0	6.53	0	3.65	0	1.68	0	196	0	13	0	13	0	8
1275	3		0	55	0	0	0	0	6	1	0	0	1	1	2	1	0	0	0	1	0	1	8	0	1	0	0	0	0	1	26.3	1	4.53	0	139	0	6.16	0	4.18	0	1.32	0	254	0	678	1	246	1	503.2
1276	3		1	67	1	0	0	0	6	1	0	0	1	1	1	0	0	0	1	0	0	0	0	1	1	0	0	0	0	0	27.6	1	4.63	0	134	0	4.6	0	2.88	0	1.53	0	163	0	29	0	27	0	15.7
1277		0	0	77	1	0	0	0	0	0	0	0	1	1	2	1	0	0	1	1	1	1	8	0	1	1	0	0	0	0			2.38	1	77	1	8.4	0	7.4	0	0.4	0	222	0	141	1	88	1	220.2
1278	3		1	67	1	0	0	0	2	1	0	0	0	0	3	1	0	0	1	1	1	1	5	0	1	0	0	0	0	0	18.8	0	3.57	0	112	1	5.9	0	4.2	0	1.3	0	298	0	237	1	144	1	145.6
1279	3		0	71	1	0	0	0	6	1	0	0	1	1	1	0	0	0	1	1	0	1	3	1	1	0	0	0	0	0	27.6	1	3.95	0	123	0	8.29	0	5.51	0	2.21	0	209	0	277	1	273	1	79.7
1280	4		0	45	0	0	0	0	0	0	0	0	1	1	2	1	0	0	1	1	0	1	5	1	0	0	0	0	0	0	19.4	0	3.13	1	99	1	6.67	0	3.86	0	2.24	0	154	0	16	0	13	0	9.8
1281	3		0	61	0	0	0	0	0	0	0	0	1	1	1	0	0	0	1	0	0	0	0	0	1	0	0	0	1	0	22	0	4.75	0	146	0	10.06	1	7.45	0	2.05	0	216	0	11	0	18	0	7.3
1282	4		0	49	0	0	2	1	2	1	0	0	1	1	1	0	0	1	0	0	0	0	0	0	0	0	0	0	0	1	25.4	1	4.66	0	154	0	6.34	0	4.24	0	1.8	0	206	0	113	1	88	1	17.7
1283	4		1	38	0	0	0	0	0	0	0	0	0	0	2	1	0	0	1	0	0	0	0	0	0	0	0	0			22.4	0
1284	3		0	39	0	0	0	0	0	0	0	0	0	0	2	1	0	0	0	0	0	1	5	0	0	0	0	0	1	1	24.7	1	4.59	0	152	0	4.68	0	2.59	0	1.66	0	203	0	332	1	47	1	15.1
1285	2	0	1	75	1	0	0	0	0	0	0	0	1	1	1	0	0	1	0	0	0	0	0	0	0	0	0	0	0	0	24.9	1	3.89	0	127	0	4.92	0	2.95	0	1.63	0	175	0	12	0	13	0	14.5
1286	3		0	64	0	0	0	0	6	1	0	0	2		1	0	0	0	1	0	0	1	15	0	0	0	0	0	0	0	22	0	3.76	0	123	0	3.41	0	1.8	0	1.36	0	122	0	16	0	15	0	15.9
1287	4	0	1	62	0	0	0	0	0	0	0	0	1	1	2	1	0	1	0	0	0	0	0	0	0	0	0	0	0	0	21.7	0	4.85	0	139	0	10.8	1	8.4	1	1.6	0	229	0	100	1	61	1	16.4
1288	1		1	50	0	0	0	0	2	1	0	0	0	0	2	1	0	0	0	1	1	1	15	0	0	0	0	0	0	0			4.84	0	155	0	11.38	1	5.86	0	4.19	1	236	0	173	1	91	1	67.2
1289	3	0	0	76	1	0	0	0	0	0	0	0	1	1	1	0	0	0	0	1	0	0	0	1	1	0	0	0	0	1	27.8	1	3.9	0	135	0	7.52	0	4.58	0	2.03	0	236	0	407	1	269	1	87.3
1290	4		1	69	1	0	2	1	0	0	0	0	0	0	2	1	0	0	0	1	0	0	0	0	1	0	0	0	1	0	20.3	0	3.74	0	121	0	13.24	1	9.76	1	2.83	0	315	1	16	0	16	0	22.7
1291	4		0	48	0	0	3	1	0	0	0	0	1	1	2	1	0	0	1	0	1	1	15	0	0	0	0	0	0	0	20.3	0	4.66	0	150	0	5.51	0	3.4	0	1.62	0	131	0	14	0	16	0	9.1
1292	4		1	50	0	0	2	1	6	1	0	0	1	1	1	0	0	0	1	0	0	1	10	0	0	0	0	0	0	0	17.8	0	4.55	0	137	0	11.16	1	9.93	1	1.04	0	359	1	30	0	109	1	23.2
1293			1	75	1	0	0	0	0	0	4	1	1	1	3	1	0										0	0	0		18.7	0
1294	3	0	0	59	0	0	2	1	6	1	0	0	1	1	2	1	0	0	1	0	0	0	0	0	0	0	0	0	1	1	22.3	0	4.13	0	148	0	7.98	0	5.74	0	1.41	0	277	0	444	1	179	1	241.1
1295	4	0	1	49	0	0	2	1	0	0	0	0	1	1	2	1	0							0	0	0	0	0	0	0	22.2	0	3.83	0	120	0	11.47	1	6.74	0	3.23	0	354	1	35	0	48	1	5.1
1296	3		0	61	0	0	2	1	6	1	0	0	1	1	1	0	0							1	0	0	1	0	0	0	18.2	0	4.16	0	132	0	6.06	0	4.5	0	1.12	0	183	0	12	0	12	0	23.3
1297	4	0	0	59	0	0	0	0	0	0	0	0	1	1	1	0	0	0	1	0	0	0	0	1	1	0	0	0	1	0	26.5	1	4.07	0	131	0	5.24	0	3.57	0	1.33	0	107	0	10	0	12	0	11.7
1298	3		0	76	1	0	0	0	2	1	0	0	1	1	2	1	0	0	1	0	0	0	0	0	0	0	0	0	0	0	25.6	1	3.92	0	130	0	4.62	0	2.36	0	1.87	0	115	0	11	0	14	0	6.8
1299	3	0	0	63	0	0	0	0	0	0	0	0	1	1	1	0	0	0	0	1	0	1	5	0	0	0	0	0	0	0	19.1	0	3.86	0	123	0	6.35	0	3.6	0	1.89	0	142	0	227	1	110	1	55.5
1300	4	0	1	73	1	0	2	1	0	0	0	0	1	1	1	0	0	0	1	0	0	0	0				0	0	0	0			4.18	0	121	0	11.91	1	8.53	1	2.51	0	354	1	17	0	21	0	10.5
1301	3	0	1	74	1	0	2	1	0	0	0	0	1	1	0	1	0	0	1	1	0	0	0	0	0	0	0	0	0	0	30.5	1	4.41	0	127	0	6.3	0	5	0	1.1	0	153	0	25	0	26	0	20.5
1302	3		0	70	1	0	0	0	6	1	0	0	0	0	3	1	0	1	0	0	0	0	0	0	0	0	0	0	0	1	20.2	0	4.4	0	156	0	4.33	0	2.52	0	1.5	0	160	0	12	0	20	0	26
1303	3	0	1	55	0	0	0	0	0	0	0	0	1	1	1	0	0	0	1	0	0	0	0	1	0	0	0	0			28.5	1	4.13	0	123	0	3.95	0	1.94	0	1.61	0	155	0	165	1	115	1	8.2
1304	1		0	69	1	0	0	0	0	0	0	0	1	1	1	0	0	0	0	0	0	1	3	1	0	0	1	0	1	1	22	0	4.68	0	142	0	4.53	0	2.71	0	1.59	0	161	0	34	0	42	1	7.2
1305	2		1	23	0	0	0	0	0	0	0	0	0	0	2	1	0	0	1	0	0	0	0	1	0	0	0	0	0	0	25.3	1	3.95	0	110	1	6.59	0	3.83	0	2.09	0	304	1	16	0	19	0	14.8
1306	4		1	52	0	0	1	1	6	1	0	0	0	0	2	1	0	0	1	0	0	1	5	0	0	0	0	0	0	0	15.6	0	4.03	0	114	1	9.4	0	7.1	0	1.8	0	182	0	76	1	71	1	11.34
1307	3		0	59	0	0	0	0	0	0	0	0	1	1	1	0	0	0	1	1	1	1	15	1	0	0	0	0	1	1	24.7	1	4.57	0	156	0	6.53	0	3.85	0	2.17	0	220	0	527	1	243	1	32.2
1308	4	0	0	74	1	0	2	1	6	1	0	0	1	1	2	1	0	0	1	0	0	0	0	1	1	0	0	0	0	0	29.8	1	4.11	0	124	0	5.16	0	3.37	0	1.12	0	151	0	5	0	14	0	10.7
1309	3	0	0	61	0	0	0	0	0	0	0	0	1	1	1	0	0	0	1	0	0	1	5	0	0	1	1	1	1	1	25.2	1	3.94	0	124	0	5.16	0	3	0	1.52	0	164	0	398	1	285	1	16
1310	3		0	57	0	0	0	0	0	0	2	1	1	1	2	1	0	0	1	1	0	1	15	0	0	0	0	0			17.8	0	3.69	0	121	0	5.65	0	3.2	0	1.97	0	223	0	252	1	184	1	530.8
1311	4	0	0	59	0	0	2	1	0	0	0	0	1	1	1	0	0	0	1	0	0	0	0	0	1	0	1	0	0	1	22.1	0	4.27	0	135	0	7.28	0	5.41	0	1.14	0	164	0	24	0	18	0	19.9
1312	4	0	1	79	1	0	0	0	6	1	0	0	1	1	0	1	0	0	1	0	0	0	0	0	0	0	0	0	0	0	20.5	0	4.62	0	130	0	5.2	0	3.1	0	1.7	0	140	0	10	0	26	0	12.9
1313	3	0	0	53	0	0	0	0	0	0	0	0	1	1	1	0	0	0	1	0	0	0	0	1	0	0	0	0	0	0	25.9	1	3.99	0	119	1	6.09	0	3.69	0	1.49	0	246	0	14	0	13	0	15.4
1314	4	0	0	60	0	0	1	1	0	0	0	0	0	0	0	1	0	0	1	0	0	0	0	1	1	0	0	0	1	1	22.5	0	4.84	0	134	0	6.1	0	4	0	1.5	0	160	0	9	0	18	0	12.4
1315		0	1	65	1	0	0	0	6	1	0	0	1	1	1	0	0							0	0	0	0	0	1	0	27.2	1	3.67	0	123	0	4.45	0	3.03	0	0.91	0	149	0	80	1	78	1	23.3
1316	2	0	0	57	0	0	1	1	0	0	0	0	2		3	1	0	0	1	0	0	0	0	1	1	0	0	0	0	1	17.6	0
1317	3		0	56	0	0	0	0	0	0	0	0	0	0	2	1	0	0	0	1	0	1	5	0	0	0	1	0	1	1	21.3	0	4.08	0	119	1	6.72	0	4.76	0	1.49	0	251	0	64	1	49	1	477.9
1318	3		1	55	0	0	0	0	0	0	0	0	0	0	3	1	0	0	1	1	0	0	0	0	0	0	0	0	0	0	27.1	1	2.92	1	87	1	11.2	1	8.1	1	2.3	0	371	1	134	1	152	1	115
1319	3		0	51	0	0	0	0	2	1	0	0	0	0	2	1	0	0	1	0	0	0	0	0	0	0	0	0	0	0	24.2	1	4.72	0	151	0	4.77	0	3.14	0	1.07	0	134	0	39	0	33	0	64.1
1320	3	0	0	75	1	0	0	0	0	0	0	0	1	1	1	0	0	0	1	1	1	1	10	0	0	0	0	0	0	0	22.7	0	3.56	0	121	0	7.27	0	4.8	0	2.11	0	198	0	62	1	96	1	421.3
1321	4	0	0	67	1	0	1	1	0	0	0	0	1	1	2	1	0	0	0	0	0	1	5	0	0	0	0	0	1	1	18.4	0	4.76	0	152	0	4.26	0	2.19	0	1.43	0	154	0	101	1	162	1	14.4
1322	4	1	1	57	0	0	0	0	0	0	0	0	1	1	2	1	0	1	0	0	0	0	0	0	0	0	0	0			22.2	0	5.29	0	162	0	14.26	1	7.73	1	5.92	1	242	0	21	0	25	0	16
1323	1		0	69	1	0	1	1	1	1	0	0	1	1	3	1	0	1	0	0	0	0	0	0	1	0	0	0	1	1	20.5	0													26	0
1324	1		1	82	1	0	0	0	0	0	0	0	1	1	2	1	0	0	1	0	0	0	0	0	0	0	0	0	0	0	24.4	1	3.6	0	109	1	8.76	0	6.33	0	2.19	0	356	1	19	0	23	0	6.7
1325	4		0	65	1	0	2	1	2	1	0	0	1	1	2	1	0	0	0	0	1	0	0	0	1	0	0	0	0	0	23.3	0	2.63	1	71	1	18.71	1	17.97	1	1.9	0	209	0	10	0	20	0	8.8
1326	4	0	0	69	1	0	1	1	0	0	0	0	2		2	1	0	0	1	0	0	1	11	0	0	0	0	0			26.7	1	4.41	0	134	0	5.6	0	3.7	0	1.6	0	164	0	35	0	25	0	8.9
1327	4	0	0	53	0	0	0	0	0	0	0	0	1	1	2	1	0	0	1	0	0	1	15	0	0	0	0	0			23.2	0	4.16	0	121	0	7.24	0	4.54	0	2.32	0	242	0	12	0	10	0	16.7
1328	4	0	0	49	0	0	0	0	6	1	0	0	2		3	1	0	0	0	0	0	1	15	0	0	0	0	0	1	1	25.5	1	4.03	0	128	0	8.39	0	5.67	0	2.32	0	374	1	22	0	12	0	7.2
1329	2	0	0	72	1	0	0	0	0	0	0	0	1	1	1	0	0	0	1	0	0	1	5	0	1	0	1	0	1	0	21.1	0	4.66	0	149	0	7.5	0	5.8	0	1	0	220	0	42	1	31	0	18.3
1330	2		0	59	0	0	0	0	0	0	0	0	1	1	1	0	0	0	1	0	0	1	5	0	0	0	0	0			23.1	0	4.74	0	125	0	5.8	0	3.99	0	1.53	0	99	0	26	0	20	0	5.8
1331	3		0	44	0	0	0	0	6	1	0	0	1	1	2	1	0	0	1	1	0	1	10	1	0	0	0	0	0	0	28.4	1	5.14	0	157	0	5.1	0	3.2	0	1.1	0	140	0	319	1	142	1	391
1332	4	0	1	61	0	0	0	0	0	0	0	0	1	1	2	1	0	1	0	0	0	0	0	0	0	0	0	0			30.7	1	3.83	0	114	1	5.44	0	3.32	0	1.64	0	200	0	17	0	15	0	11.3
1333	3	0	1	73	1	0	0	0	2	1	0	0	1	1	2	1	0	0	1	0	0	0	0	0	1	0	0	0	0	0	26.8	1	4.37	0	138	0	4.24	0	2.56	0	1.56	0	163	0	17	0	17	0	9.9
1334	2		0	65	1	0	0	0	0	0	0	0	1	1	1	0	0	0	1	0	0	1	8	0	0	0	0	0	1	1	15.5	0	4.84	0	147	0	6.54	0	3.5	0	2.54	0	176	0	10	0	16	0	12.8
1335	4		1	52	0	0	0	0	0	0	0	0	0	0	1	0	0	0	1	1	0	1	10	1	0	0	0	0	0	0	21.9	0	4.39	0	125	0	4.25	0	2.47	0	1.19	0	194	0	307	1	275	1	567.1
1336	4		1	58	0	0	2	1	0	0	0	0	1	1	2	1	0	0	1	0	0	0	0	0	0	0	0	0	0	0	18.5	0	3.59	0	118	1	3.99	0	2.42	0	0.62	0	162	0	10	0	13	0	8.7
1337	3	0	0	67	1	0	0	0	0	0	0	0	1	1	1	0	0	0	1	0	0	0	0	0	0	0	0	0	1	0	28.3	1	4.75	0	154	0	5.88	0	3.35	0	1.97	0	226	0	27	0	21	0	131
1338	3	0	1	69	1	0	0	0	0	0	0	0	1	1	1	0	0	0	0	1	0	1	5	0	0	0	0	0	0	0	25.4	1	3.59	0	110	1	4.4	0	3.5	0	0.7	0	113	0	414	1	253	1	265.3
1339	4	1	1	53	0	0	0	0	0	0	0	0	0	0	2	1	0	0	1	1	0	1	2.5	0	0	0	0	0			23.9	0	4.71	0	140	0	9.84	0	7.37	0	1.67	0	227	0	196	1	117	1	96.4
1340	4	0	0	63	0	0	0	0	0	0	0	0	1	1	1	0	0	0	1	0	0	1	3	0	0	0	0	0	0	0	24	1	3.95	0	116	1	5.45	0	3.87	0	1.02	0	139	0	29	0	48	1	16.7
1341	3		0	57	0	0	0	0	0	0	0	0	0	0	2	1	0	0	1	1	0	0	0	1	0	0	0	0	0	0	27.7	1	4.1	0	140	0	5.86	0	3.9	0	1.6	0	136	0	603	1	436	1	127.6
1342	3	0	0	47	0	0	1	1	1	1	0	0	1	1	1	0	0	0	1	0	0	0	0	0	0	0	0	0			20	0
1343	4	0	1	72	1	0	2	1	0	0	0	0	1	1	2	1	0	0	0	0	0	1	6	0	1	0	0	0	0	0	27.7	1	3.11	1	82	1	4.47	0	3.09	0	0.98	0	198	0	8	0	16	0	7.6
1344	2	0	1	63	0	0	0	0	2	1	0	0	1	1	1	0	0	1	0	0	0	0	0	0	0	0	0	0			24.7	1	3.98	0	132	0	3.66	0	2.13	0	1.27	0	177	0	301	1	98	1	16.5
1345	1		1	72	1	0	3	1	0	0	0	0	1	1	2	1	0	1	0	0	0	0	0	0	0	0	0	0			24.3	1	4.77	0	146	0	8.7	0	6	0	2.3	0	286	0	35	0	36	0	7.3
1346	3		0	50	0	0	0	0	5	1	2	1	0	0	3	1	0	0	0	1	0	1	3	0	0	0	0	0	1	0	23	0	3.64	0	121	0	6.6	0	5.5	0	0.7	0	131	0	70	1	45	1	568.9
1347	4		1	56	0	0	2	1	0	0	0	0	0	0	2	1	0	0	1	0	0	0	0	0	0	0	0	0	0	0	22.5	0	4.09	0	91	1	6.27	0	4.85	0	0.99	0	366	1	94	1	67	1	11.1
1348	2		0	42	0	0	1	1	0	0	0	0	0	0	3	1	0	0	0	1	0	1	20	0	0	0	0	0	0	0	19	0	4.16	0	137	0	4.7	0	3.5	0	0.9	0	262	0	25	0	24	0	7.2
1349	4		0	58	0	0	1	1	2	1	0	0	1	1	1	0	0	0	1	0	0	0	0	0	1	0	0	0	1	1	24	1	2.89	1	86	1	8.49	0	6.39	0	0.89	0	159	0	24	0	21	0	18.6
1350	4		0	65	1	0	1	1	0	0	0	0	1	1	3	1	0	0	1	0	0	0	0	1	0	0	0	0	1	1	23.9	0	4.96	0	151	0	4.6	0	2.4	0	1.5	0	202	0	14	0	18	0	7.7
1351	3	1	0	47	0	0	1	1	0	0	0	0	1	1	0	1	0	0	0	1	0	0	0	0	0	0	0	0	0	0	25.8	1	5	0	152	0	9.5	0	6.9	0	2.2	0	213	0	21	0	18	0	5.54
1352	3		1	57	0	0	0	0	2	1	0	0	1	1	1	0	0	0	1	0	1	1	4	0	0	0	0	0	0	0	22.3	0	2.98	1	107	1	6.84	0	3.92	0	2.41	0	165	0	356	1	185	1	38.5
1353	3	0	0	59	0	0	0	0	2	1	0	0	0	0	2	1	0	0	0	1	0	0	0	0	0	0	0	0	1	0	24.8	1	4.22	0	144	0	5.71	0	3.43	0	1.44	0	242	0	533	1	226	1	216.8
1354	3	0	1	69	1	0	2	1	0	0	0	0	1	1	1	0	0	0	1	0	0	0	0	0	0	0	0	0	1	1	27.5	1	4.05	0	132	0	7.93	0	5.93	0	1.08	0	201	0	26	0	14	0	26.8
1355	4	0	0	66	1	0	0	0	0	0	0	0	0	0	2	1	0	0	1	0	0	1	15	0	0	0	0	0	1	1	22.4	0	4.14	0	131	0	7.13	0	4.3	0	2.02	0	180	0	17	0	31	0	7.1
1356	4		0	65	1	0	0	0	1	1	0	0	1	1	1	0	0	0	1	0	0	1	10	0	1	0	0	0			23.6	0	3.09	1	97	1	13	1	11.9	1	0.8	0	296	0	9	0	17	0	17.92
1357	3	0	0	63	0	0	1	1	2	1	0	0	0	0	2	1	0	0	1	1	0	1	11	1	1	0	0	0	1	1	26.3	1	4.87	0	135	0	7.2	0	4.8	0	1.5	0	127	0	8	0	4	0	10.2
1358	3		1	73	1	0	0	0	0	0	0	0	1	1	1	0	0	0	1	1	0	0	0	1	1	0	0	0			26	1	3.31	1	118	1	5.52	0	3.23	0	1.88	0	190	0	103	1	87	1	222.2
1359	3		1	41	0	0	0	0	6	1	0	0	1	1	2	1	0	0	1	0	0	1	5	0	0	0	0	0	0	0	21.7	0	4.26	0	142	0	7.49	0	4.35	0	2.33	0	224	0	162	1	30	0	3.6
1360	4	0	0	43	0	0	2	1	0	0	1	1	1	1	2	1	0	0	1	0	1	1	5	0	0	0	1	0	0	0	24.1	1	5.47	0	165	0	11	1	9.2	1	0.9	0	118	0	219	1	109	1	32.7
1361	3		1	69	1	0	0	0	0	0	0	0	1	1	2	1	0	0	1	0	0	1	3	1	1	0	0	0			20.1	0	3.9	0	127	0	7.18	0	5.73	0	1.21	0	159	0	11	0	14	0	12.8
1362	4	0	0	68	1	0	0	0	2	1	0	0	1	1	1	0	0	0	1	0	0	0	0	0	1	0	1	1	0	0	25.1	1	4.96	0	166	0	8.02	0	5.94	0	1.52	0	169	0	28	0	49	1	22.6
1363	3		0	68	1	0	0	0	0	0	1	1	0	0	2	1	0	0	1	1	0	0	0	0	0	0	0	0			24.9	1	4.39	0	144	0	5.38	0	3.37	0	1.16	0	190	0	165	1	132	1	220
1364	4	0	0	72	1	0	0	0	0	0	0	0	1	1	1	0	0	0	1	0	0	1	3	0	0	0	0	0	1	0	26.1	1	4.36	0	140	0	6.53	0	4.37	0	1.49	0	139	0	31	0	26	0	16
1365		0	1	50	0	0	3	1	4	1	0	0	1	1	1	0	0	0	1	0	0	1	5	1	1	0	0	0	0	0	25.5	1	4.64	0	140	0	6.9	0	4.4	0	2	0	358	1	23	0	29	0	9.6
1366	4	0	0	40	0	0	0	0	0	0	0	0	0	0	3	1	0	1	0	0	0	0	0	0	0	0	0	0			28.7	1													107	1	48	1	10.2
1367	1	0	0	78	1	0	0	0	2	1	0	0	1	1	2	1	0	0	1	1	1	0	0	0	0		0	0	1	1	22.3	0	4.41	0	149	0	4.1	0	2.52	0	0.99	0	218	0	299	1	198	1	166.6
1368	4		0	55	0	0	0	0	0	0	0	0	1	1	2	1	0	0	1	0	0	0	0	1	1	0	0	0	0	0	23.9	0	4.23	0	126	0	3.13	0	1.5	0	1.09	0	178	0	103	1	85	1	9.4
1369	4		0	40	0	0	0	0	0	0	0	0	0	0	2	1	0	0	0	0	0	1	5	0	0	0	0	0	0	0	22.8	0	5.03	0	160	0	6.16	0	3.72	0	1.79	0	254	0	16	0	14	0	12.8
1370	4		1	43	0	0	0	0	0	0	0	0	1	1	2	1	0	0	1	0	0	0	0	0	0		0	0			25.5	1	3.96	0	128	0	5.88	0	2.92	0	2.49	0	128	0	27	0	23	0	7
1371	3		1	63	0	0	0	0	0	0	0	0	1	1	2	1	0	0	0	1	0	0	0	0	0	0	0	0			23.5	0	3.19	1	100	1	11.54	1	8.9	1	1.43	0	386	1	70	1	53	1	407.8
1372	4		0	64	0	0	0	0	2	1	0	0	1	1	1	0	0	0	1	0	1	1	3	0	0	0	1	1			25.9	1	3.67	0	123	0	8.96	0	6.37	0	1.7	0	192	0	49	1	65	1	45.3
1373	1		0	75	1	0	0	0	2	1	0	0	1	1	1	0	0	1	0	0	0	0	0	0	0	0	0	0			23.5	0	4.08	0	136	0	4.88	0	3.29	0	1.02	0	199	0	15	0	18	0	11.8
1374	4	0	0	78	1	0	0	0	0	0	0	0	1	1	2	1	0	0	1	1	0	1	5	0	1	0	1	0	0	1	24.2	1	3.62	0	116	1	5.14	0	3.45	0	1.15	0	159	0	15	0	19	0	8.3
1375	3	0	0	65	1	0	0	0	0	0	0	0	1	1	1	0	0	0	0	1	0	1	10	0	0	0	0	0	0	0	20.1	0	4.24	0	132	0	10.8	1	9.5	1	0.8	0	232	0	33	0	29	0	49.1
1376	4		1	70	1	0	0	0	0	0	0	0	0	0	2	1	0	0	0	1	0	0	0	0	1	0	0	0	0	0	29.3	1	3.68	0	129	0	5.94	0	4.05	0	1.23	0	198	0	296	1	382	1	194.8
1377	4	0	1	64	0	0	2	1	0	0	0	0	1	1	1	0	0	0	1	0	0	0	0	1	1	0	0	0			19.9	0	3.51	0	115	1	8.16	0	5.6	0	2.18	0	315	1	11	0	14	0	21.7
1378	4		0	41	0	0	0	0	5	1	0	0	1	1	2	1	0	1	0	0	0	0	0	0	0	0	0	0	0	0	26.5	1	5.07	0	155	0	6.6	0	3.59	0	2.66	0	130	0	66	1	35	0	16.5
1379	1		1	54	0	0	0	0	0	0	0	0	1	1	2	1	0	0	1	0	0	0	0	1	1	0	0	0	0	0	22.5	0	4.34	0	138	0	5.86	0	3.31	0	2.16	0	196	0	18	0	22	0	9.7
1380	3		1	62	0	0	0	0	0	0	0	0	1	1	1	0	0	0	1	0	0	1	2.5	0	0	0	0	0	0	0	16	0	4.11	0	123	0	5.08	0	3.04	0	1.77	0	148	0	12	0	20	0	11.9
1381	3		0	70	1	0	2	1	2	1	0	0	1	1	1	0	0	0	1	0	0	0	0	0	0	0	0	0	0	0	25.1	1	4.12	0	139	0	9.04	0	4.97	0	3.7	0	125	0	52	1	41	1	21.2
1382	4		0	57	0	0	0	0	2	1	0	0	0	0	2	1	0	0	0	1	0	0	0	0	0	0	0	0	0	0	25.6	1	4.28	0	129	0	9.26	0	7.63	1	1.44	0	389	1	115	1	21.1	0	406.4
1383	3	1	1	63	0	0	3	1	0	0	0	0	0	0	2	1	0	1	0	0	0	0	0	1	1	0	0	0	0	0	22.4	0	3.63	0	103	1	6.05	0	4.47	0	0.95	0	182	0	28	0	28	0	28.4
1384	4		0	54	0	0	0	0	6	1	0	0	1	1	2	1	0	0	0	1	0	0	0	0	0	0	0	0	0	0	21.7	0	3.91	0	125	0	7.35	0	4.25	0	2.76	0	217	0	53	1	26	0	36.6
1385	3		1	69	1	0	0	0	2	1	0	0	0	0	3	1	0	0	1	1	0	0	0	0	0	0	1	0	0	0	20.8	0	3.71	0	120	0	4.43	0	2.58	0	1.38	0	255	0	97	1	73	1	301
1386	3	1	0	69	1	0	0	0	4	1	0	0	1	1	1	0	0	0	1	0	0	0	0	1	0	0	0	0	0	0	22.2	0	4.42	0	144	0	6.32	0	3.98	0	2.03	0	213	0	15	0	19	0	9.5
1387	4		1	57	0	0	2	1	6	1	0	0	1	1	1	0	0	0	0	0	0	1	7.5	0	0	0	0	0	0	0	24.5	1	4.39	0	135	0	4	0	2.8	0	0.9	0	134	0	16	0	20	0	12.9
1388	4	0	0	56	0	0	2	1	0	0	0	0	1	1	1	0	0	0	1	0	0	0	0	0	0	0	0	0			21.3	0	4.2	0	144	0	5.76	0	3.56	0	1.92	0	93	0	10	0	15	0	12
1389	4		0	66	1	0	0	0	0	0	0	0	1	1	2	1	0	0	1	0	0	0	0	0	0	0	0	0	0	0	23.2	0	5.32	0	135	0	10.24	1	6.54	0	2.99	0	119	0	14	0	18	0	17.7
1390	4		0	74	1	0	0	0	0	0	0	0	1	1	1	0	0	1	0	0	0	0	0	0	1	1	0	0	0	1	22.3	0	4.28	0	121	0	9.15	0	6.88	0	1.59	0	186	0	22	0	23	0	13.4
1391	3	1	1	76	1	0	0	0	0	0	0	0	1	1	1	0	0	0	1	0	0	1	5	1	1	0	0	0	0	0	23.2	0	4.32	0	136	0	8.93	0	4.92	0	3.26	0	184	0	13	0	17	0	12.6
1392	4		1	67	1	0	0	0	0	0	0	0	1	1	1	0	0	1	0	0	0	0	0	1	0	0	0	0	0	0	24.2	1	3.8	0	121	0	5.06	0	3.21	0	1.44	0	165	0	18	0	20	0	19.3
1393		1	1	55	0	0	2	1	0	0	0	0	0	0	3	1	0	0	1	1	1	1	15	0	0	0	0	0	0	0	20	0	4.53	0	144	0	6.05	0	3.56	0	2.09	0	324	1	41	1	25	0	305
1394	4		1	37	0	0	2	1	0	0	0	0	1	1	1	0	0	0	1	0	0	0	0	0	0	0	0	0	0	0	22.6	0	3.62	0	112	1	10.02	1	5.81	0	2.04	0	226	0	67	1	78	1	20.2
1395	1	0	0	60	0	0	0	0	6	1	0	0	1	1	2	1	0	0	0	1	0	1	3	1	0	1	0	0	1	1	23.8	0	4.24	0	138	0	6.04	0	3.78	0	1.52	0	328	1	134	1	65	1	308.2
1396	4	0	0	66	1	0	0	0	2	1	0	0	1	1	2	1	0	0	0	1	0	1	10	0	0	0	0	0	0	0			3.43	1	110	1	8.83	0	5.28	0	1.95	0	36	0	15	0	26	0	162
1397	4	0	1	62	0	0	1	1	2	1	0	0	1	1	2	1	0	0	1	0	0	0	0	0	0	0	0	0	0	0	22.2	0	3.44	1	112	1	3.8	0	1.5	0	2	0	298	0	12	0	17	0	13.1
1398	2		0	59	0	0	0	0	6	1	0	0	1	1	3	1	0	0	1	0	1	1	10	0	0	0	0	0	0	0	19.7	0	4.35	0	136	0	5.09	0	3.63	0	0.84	0	151	0	38	0	39	0	20.4
1399	4	0	0	50	0	0	2	1	0	0	0	0	1	1	2	1	0	0	1	0	0	0	0	0	0	0	0	0	0	0	22.1	0	4.4	0	143	0	6.89	0	4.22	0	2.16	0	190	0	25	0	30	0	12.1
1400	4	0	1	63	0	0	2	1	0	0	0	0	1	1	2	1	0	0	1	0	0	0	0	0	1	0	0	0	0	0	22.3	0	3.85	0	124	0	5.55	0	3.86	0	1.2	0	169	0	19	0	16	0	14.7
1401		0	1	56	0	0	2	1	0	0	0	0	1	1	2	1	0	0	1	0	0	0	0	0	0	0	0	0	0	0	22.3	0	3.85	0	124	0	5.55	0	3.86	0	1.2	0	169	0	16	0	17	0	17.4
1402	4		0	45	0	0	0	0	0	0	0	0	0	0	2	1	0	0	1	0	0	0	0	0	0	0	0	0	0	0	25.3	1	4.61	0	146	0	8.82	0	6.07	0	1.93	0	325	1	36	0	20	0	9.2
1403	1	0	1	65	1	0	0	0	0	0	0	0	1	1	2	1	0	1	0	0	0	0	0	0	1	0	0	0			23.2	0	4.07	0	123	0	3.96	0	2.09	0	1.53	0	163	0	19	0	18	0	38.9
1404	3		0	55	0	0	1	1	6	1	0	0	1	1	1	0	0	0	1	0	0	1	10	0	0	0	0	0	0	1	22.8	0	4.57	0	124	0	3.9	0	2.3	0	1.2	0	118	0	24	0	8	0	5.4
1405	3		1	63	0	0	0	0	6	1	0	0	0	0	2	1	0	0	1	0	0	0	0	0	0	0	0	0	0	0	26.8	1	3.85	0	124	0	3.88	0	1.09	0	1.56	0	131	0	25	0	23	0	8.9
1406	4		0	68	1	0	0	0	0	0	0	0	1	1	2	1	0	0	1	1	0	1	2	0	0	0	0	0	0	0	17.2	0	4.34	0	133	0	5.83	0	4.07	0	1.47	0	179	0	11	0	18	0	12.3
1407	4	0	0	75	1	0	2	1	0	0	0	0	1	1	2	1	0	0	1	0	0	0	0	0	0	0	0	0	0	0	26.6	1	4.78	0	153	0	5.57	0	3.81	0	1.01	0	126	0	20	0	17	0	24.4
1408			0	44	0	0	0	0	5	1	0	0	0	0	3	1	0	0	1	0	0	1	15	0	0	0	0	0	0	0	20.1	0
1409	4	0	0	52	0	0	2	1	0	0	0	0	1	1	2	1	0	0	1	1	0	1	15	1	1	0	0	0	1	1	29.4	1	4.94	0	153	0	8.2	0	6.2	0	1.5	0	157	0	321	1	133	1	84.4
1410	4		0	69	1	0	0	0	6	1	0	0	1	1	1	0	0	0	1	0	0	0	0	0	0	0	1	0	0	0	20.2	0	3.64	0	120	0	6.76	0	4.54	0	1.42	0	173	0	19	0	21	0	8
1411	2	0	0	69	1	0	0	0	0	0	0	0	1	1	1	0	0	0	1	0	0	1	6	0	1	0	0	0	0	0	24.9	1	4.88	0	154	0	8.27	0	5.27	0	2.7	0	179	0	11	0	11	0	17.1
1412	4		0	76	1	0	0	0	1	1	0	0	1	1	1	0	0	0	1	0	0	0	0	1	1	0	0	0	0	0	36.5	1	4.27	0	142	0	8.7	0	7.4	0	0.8	0	268	0	15	0	17	0	16.9
1413	1		0	78	1	0	0	0	0	0	0	0	1	1	0	1	0	0	0	1	0	0	0	0	0	0	0	0	0	0	22.5	0	3.71	0	123	0	4.32	0	2.05	0	2.07	0	116	0	498	1	393	1	72.9
1414	4		0	42	0	0	0	0	0	0	0	0	1	1	2	1	0	0	0	1	0	0	0	0	0	0	0	0	0	0	24.9	1	3.91	0	127	0	5.34	0	2.57	0	2.34	0	314	1	576	1	190	1	47.3
1415	4	0	1	75	1	0	0	0	0	0	0	0	1	1	1	0	0	0	1	0	0	0	0	0	0	0	0	0	0	0			4.13	0	122	0	10.2	1	9.4	1	0.6	0	104	0	10	0	11	0	13.9
1416	4	0	0	42	0	0	2	1	0	0	0	0	1	1	2	1	0	1	0	0	0	0	0	0	0	0	0	0	1	1	22.6	0	4.11	0	142	0	12.82	1	9.1	1	2.94	0	249	0	188	1	152	1	14.3
1417	3		0	61	0	0	3	1	2	1	0	0	0	0	2	1	0	0	1	1	0	0	0	0	0	0	0	0	0	0	20.7	0	4.64	0	144	0	7.4	0	4.75	0	1.83	0	121	0	1137	1	527	1	213
1418	4		1	49	0	0	2	1	0	0	0	0	1	1	2	1	0	0	1	0	0	0	0	0	0	0	0	0	0	0	26.8	1	4.48	0	139	0	6.83	0	4.41	0	1.77	0	254	0	48	1	37	0	12.9
1419	3		0	52	0	0	0	0	0	0	0	0	0	0	3	1	0	0	0	1	0	0	0	0	0	0	0	0	0	0	29.8	1	2.51	1	78	1	7.13	0	4.26	0	1.75	0	327	1	179	1	93	1	233
1420	1		0	71	1	0	1	1	6	1	1	1	0	0	1	0	0	0	0	0	0	1	4	0	0	1	0	0	1	0	24.8	1	4.74	0	142	0	5.4	0	3.1	0	1.6	0	141	0	15	0	11	0	13
1421	3	0	0	76	1	0	0	0	2	1	0	0	0	0	3	1	0	0	0	1	0	1	10	0	0	0	0	0	1	1	18.8	0	3.74	0	125	0	4.82	0	2.57	0	1.73	0	209	0	131	1	87	1	182
1422	3		0	66	1	0	0	0	0	0	0	0	1	1	3	1	0	0	1	0	0	0	0	0	0	0	0	0	0	0	19.8	0	4.88	0	151	0	7.02	0	4.49	0	1.64	0	97	0	10	0	12	0	6.3
1423	4	0	0	39	0	0	0	0	2	1	0	0	0	0	2	1	0	0	1	0	0	1	15	0	1	0	0	0	0	0	24.1	1	4.97	0	151	0	10.13	1	6.44	0	2.42	0	315	1	16	0	15	0	16.5
1424	4		0	44	0	0	2	1	2	1	0	0	1	1	1	0	0	0	1	1	0	1	5	0	0	0	0	0	0	1	24.3	1	5.18	0	161	0	5.3	0	4	0	1.1	0	202	0	333	1	175	1	127
1425	4		0	56	0	0	2	1	0	0	0	0	1	1	2	1	0	0	1	0	0	0	0	0	0	0	0	0	0	0	20.9	0	4.55	0	142	0	5.53	0	2.66	0	2.24	0	92	0	40	0	42	1	25.7
1426	4		1	78	1	0	0	0	0	0	0	0	1	1	1	0	0	1	0	0	0	0	0	0	0	0	0	0	0	0			2.66	1	80	1	3.66	0	2.29	0	0.6	0	206	0	40	0	47	1	92.4
1427		1	0	75	1	0	0	0	0	0	0	0	1	1	2	1	0	0	1	1	0	1	5	1	0	0	0	0	0	0	21.7	0	4	0	128	0	16.82	1	15.48	1	0.37	0	209	0	132	1	131	1	403
1428	3		0	55	0	0	0	0	0	0	0	0	1	1	1	0	0	0	1	0	0	0	0	1	0	0	0	0	0	0	23.7	0	5.07	0	154	0	3.82	0	2.33	0	1.08	0	165	0	67	1	40	0	19.3
1429	3		0	74	1	0	0	0	0	0	0	0	0	0	3	1	0	0	1	1	1	0	0	0	1	0	1	1	0	1	22.5	0	4.46	0	144	0	6.43	0	3.27	0	2.27	0	244	0	268	1	182	1	74.1
1430	2	0	0	66	1	0	0	0	0	0	0	0	0	0	2	1	0	0	1	0	0	0	0	0	0	0	0	0	0	0	24.6	1			151	0	4.44	0	2.61	0	1.34	0	283	0	29	0	17	0	25.5
1431	3		0	37	0	0	0	0	0	0	0	0	1	1	1	0	0	0	1	0	0	0	0	0	0	0	0	0	0	0	22.8	0	4.97	0	147	0	7.41	0	4.53	0	2.13	0	205	0	22	0	26	0	15
1432	4	0	1	63	0	0	2	1	0	0	0	0	1	1	3	1	0	0	1	0	1	0	0	0	0	0	0	0	0	0	19.8	0	4.24	0	134	0	6.4	0	4.6	0	1.3	0	306	1	91	1	36	0	20.4
1433	1	1	0	59	0	0	0	0	0	0	0	0	0	0	2	1	0	0	1	0	0	0	0	0	0	0	0	0	0	0	25.1	1	4.23	0	127	0	7.33	0	4.73	0	1.43	0	158	0	39	0	24	0	10.3
[truncated: 85 more columns]

## Sheet: 生存
no_id	stage4	t_bc_tbil2	t_cea2	tr_meth	tr_ch	outcome	time
1	3	0	1	0	0	1	4.72
2	2	1	0	2	0	1	7.31
3	3	0	0	2	0	1	8.66
4	3	0	1	2	1	0	16.1
5	1	0	0	1	0	1	6.43
6	2	0	0	2	1	0	14.49
7	2	0	0	0	0	0	14.56
8	3	1	1	2	0	1	2.52
9	0	1	0	0	0	0	14.36
10	1	0	0	0	0	0	14.36
11	1		0	0	0	1	10.62
12	3	0		2	1	1	7.67
13	1	1	0	1	0	1	0
14	2	0	1	2	1	0	13.57
15	3	1	0	0	0	1	12.07
16	3	0	1	2	1	0	13.28
17	2	0	0	2	0	1	6.13
18	2	1	1	2	0	1	7.25
19	2	0	1	2	1	1	4.66
20	2	0	0	2	0	1	2.33
21	1	0		1	0	0	15.41
22	3	0	1	2	1	0	15.77
23	0	1	0	1	0	1	5.9
24	1	1	1	3	1	0	16.46
25	1	0	1	0	0	1	1.74
26	3	1	0	2	1	0	16.46
27	1	0	0	1	0	0	16.52
28	2	1	1	2	1	1	14.56
29	3	0	0	2	1	1	8.26
30	0	1	0	1	0	0	16.43
31	3	0	0	2	0	1	1.25
32	3	0	1	2	1	0	17.67
33	3	0	1	2	0	1	4.56
34	2	0	1	2	1	0	20.2
35	2	1	0	2	0	1	7.44
36	0	1	1	3	1	1	4.46
37	2	0	1	0	0	1	12.46
38	3	1	1	0	0	1	1.18
39	1	0	0	3	1	1	9.93
40	2	1	0	2	1	1	9.74
41	0	1	0	2	1	0	18.95
42	1	0	0	1	0	0	19.02
43	2	1	0	2	0	1	3.05
44	1	1	0	3	1	1	24.49
45	3	0	1	2	1	1	3.02
46	3	0	1	2	0	1	1.21
47	2	1	0	2	0	1	0
48	1	0	1	3	1	1	10.3
49	3	0	0	0	0	1	17.34
50	3	1	0	2	1	1	7.8
51	3	0	0	0	0	1	14.92
52	3	0	0	2	0	1	6.43
53	3	0	0	3	1	1	15.9
54	3	0	1	2	0	1	10.79
55	3	0	0	2	1	1	3.25
56	2	1	1	0	0	0	0
57	3	1	0	2	1	1	2.2
58	0	0	0	1	0	0	20.2
59	2	0	1	0	0	1	2.75
60	2	0	0	2	0	1	1.7
61	2	1	0	0	0	1	8.95
62	1			3	1	1	17.64
63	2	1	0	2	1	1	11.97
64	3	0	0	0	0	1	5.9
65	3	0	0	2	1	1	11.34
66	2	1	0	2	0	0	8.98
67	3	0	1	2	1	1	10.82
68	1	1	0	0	0	1	9.34
69	2	0	0	0	0	0	21.38
70	1	1	1	1	0	0	1.51
71	3	1	0	2	1	1	1.28
72	2	1	1	2	1	1	5.64
73	3	0	0	0	0	1	1.54
74	2	1	0	2	1	1	10.62
75	2	0	0	2	0	1	9.21
76	3	0	1	2	1	1	7.38
77	2	0	0	2	0	1	16.52
78	3	0		0	0	1	17.64
79	2	0	0	2	1	1	11.9
80	2	1	0	2	1	1	13.57
81	0			3	1	1	65.11
82	2	1	0	2	0	1	7.28
83	0	0	1	3	1	0	23.38
84	3	1	0	0	0	1	3.61
85	2	0	1	2	0	0	23.21
86	3	0	0	2	1	0	23.15
87	0	0	0	3	1	0	23.44
88	3	0	0	2	0	1	15.64
89	3	0	0	2	1	1	6
90	2	1	0	0	0	1	3.44
91	2	0	0	2	0	1	17.9
92	3			0	0	1	9.67
93	2	1	0	2	1	1	8.03
94	0	1	0	0	0	1	9.93
95	3	1	0	3	1	1	11.93
96	1	1	1	2	1	1	14
97	0	1	0	3	1	1	22.26
98	1	1	1	0	0	1	14.75
99	3	1	1	2	1	1	1.74
100	2	1	1	0	0	1	4.07
101	2	1	1	2	0	1	4.98
102	2	1	0	0	0	1	1.87
103	3	0	0	2	1	1	12.69
104	3	0	1	0	0	1	7.97
105	2	1	1	2	1	1	15.11
106	3	0	1	0	0	1	9.25
107	0	0	0	3	1	0	28.89
108	2	1	0	2	0	1	12.49
109	3	0	1	2	0	1	16.98
110	1	0	0	1	0	0	25.38
111	3	0	0	0	0	1	7.48
112	2	0	0	2	0	1	10.52
113	3	0	0	2	1	0	21.11
114	3	0	1	0	0	1	2.75
115	3	1	0	0	0	1	4.49
116	2	1	0	2	1	1	13.57
117	1	0	1	1	0	1	11.87
118	3			2	1	1	13.8
119	3	0	0	2	1	1	13.9
120	3	1	1	2	1	1	4.52
121	2	0	0	2	1	1	20.26
122	2	1	0	2	1	1	17.67
123	1	0	0	3	1	0	19.11
124	2	1	1	2	1	1	13.21
125	3	0		2	1	1	21.31
126	0	0	0	3	1	1	23.02
127	3	0		0	0	0	0
128	3	1	1	2	0	1	2.13
129	3	0	1	2	1	1	14.89
130	3	0	1	2	0	1	12.92
131	3	1	0	2	0	1	6.39
132	0	0	0	3	1	0	27.21
133	3	0	1	1	0	1	5.61
134	3	0	1	2	1	1	0
135	2	0	1	2	0	1	13.25
136	0	0	0	3	1	0	26.89
137	2	1	0	2	0	0	27.8
138	3	1	0	2	1	1	5.57
139	2	0	0	2	1	0	26.52
140	0	1	0	0	0	1	15.97
141	2	1	1	2	1	1	11.74
142	0	1	0	0	0	1	9.02
143	3	0	0	2	1	0	22.79
144	1	1	0	3	1	0	27.77
145	3	1	1	0	0	0	1.87
146	3	0	1	0	0	1	0
147	2	1	1	2	0	1	16.23
148	3	0	0	2	0	0	0
149	0	1	0	1	0	0	28.23
150	1	0	1	1	0	1	10.52
151	2	1	1	2	0	1	11.25
152	1	0	0	1	0	0	28.59
153	2	0	0	2	0	1	5.74
154	3	1	0	0	0	1	8.62
155	2	0		2	0	1	4.72
156	1	1		0	0	1	10.75
157	3	0	0	2	0	1	15.84
158	2	0	0	2	0	1	11.84
159	3	0	1	2	1	1	10.95
160	3	0	0	2	1	0	1.11
161		1		0	0	1	1.41
162	3	1		2	0	1	5.67
163	2	1	0	2	0	1	3.97
164	3	0	0	2	1	1	5.05
165	0	0	1	3	1	1	30.92
166	3	0	1	2	1	1	22.92
167	2	1	0	2	0	1	11.7
168	1	0	0	3	0	1	22.98
169	3	1	0	2	0	1	4.39
170	3	0	1	2	1	1	16.66
171	2	0	0	2	1	1	17.44
172	3	0	1	2	0	1	2.59
173	3	1		2	0	0	3.18
174	2		1	0	0	1	4.59
175	0			3	1	1	25.34
176	2	0	0	2	0	1	28.98
177	1	0	0	1	0	0	30.1
178	1	0	0	1	0	0	0
179	2	1	0	0	0	0	29.87
180	2	0	0	2	0	0	29.87
181	1	0	1	3	1	0	30.33
182	2	1	0	2	0	1	11.74
183	3	0	1	0	0	0	0
184				3	1	1	8.59
185	2	0	1	2	0	1	2.98
186	0	0	1	1	0	1	10.75
187	3	1	1	2	1	1	5.25
188	3	0	1	2	1	1	17.57
189	3	1	1	2	0	1	7.61
190	2	1	0	2	0	0	0
191				2	1	1	8.26
192	1	0	0	1	0	0	31.28
193	2	1	0	0	0	0	12.2
194	1			3	0	1	13.28
195	1	1	0	0	0	1	15.67
196	3	0	0	0	0	0	31.11
197	2	0	0	2	0	1	21.67
198	2	0	0	2	1	1	21.87
199	3	0	0	2	0	1	14.33
200	2	0	0	2	0	1	0
201	2	0	0	2	0	1	7.7
202	0	1		0	0	1	2.75
203	2	0	0	2	0	1	26.72
204	0	0	1	1	0	0	32.13
205	2	0	0	2	0	0	0.98
206	3	1	1	0	0	1	0
207	2	0	0	2	0	1	8.33
208	2	0	1	0	0	1	0
209	3	0	1	2	1	1	21.9
210	1	0	0	3	1	1	19.18
211	2	1		0	0	0	0
212	2	0	0	2	0	1	15.31
213	0	1	1	0	0	1	21.97
214	0	1	0	0	0	1	12.26
215	3	1	0	2	1	1	12.03
216	1	0	1	2	1	0	32.85
217	2	1	0	2	1	1	0
218	1	0		1	0	1	6.26
219	1			3	1	0	35.74
220	1			3	1	1	0
221	2	1	1	2	0	1	9.54
222	2	1	0	2	0	1	16.56
223	0	0	1	1	0	0	33.64
224	2	1	0	0	0	1	11.21
225	2	1	0	2	0	1	5.15
226	1	1		0	0	1	0
227	0	1	0	1	0	0	34.46
228	2	0	1	3	1	1	11.02
229	2	0	0	2	1	1	0
230	2	1	0	2	0	1	11.48
231	3	0	1	2	0	1	3.9
232	3	0	0	2	1	1	3.74
233	2	1	1	2	0	1	3.51
234	3	0	1	2	0	1	5.38
235	0	0	0	1	0	0	0
236	3	1	0	0	0	1	4.39
237	1	0	0	1	0	1	10.59
238	3		1	0	0	0	0
239	1	0	1	2	1	1	0
240	2	1		2	0	0	0
241	2	0	1	2	0	1	0
242	1	0	0	1	0	1	4.62
243	2	1	0	2	0	0	0
244	2	0	0	1	0	1	9.57
245	3	0	0	2	0	1	1.77
246	3	0	1	2	1	1	1.7
247	2	0	0	2	0	1	6.46
248	3	0	1	0	0	0	0
249	2	0	1	2	0	1	13.74
250	2	0	1	2	1	1	22.98
251	3	0	1	1	0	1	8.2
252	1	0	0	1	0	0	36.07
253	2	1	1	2	1	1	6.39
254	0	1	1	0	0	0	0
255	2	1		0	0	1	16.3
256	3	0	1	2	1	0	36.66
257	2	1		2	0	1	7.87
258	0	0	1	3	1	1	41.34
259	1	0	1	2	1	1	21.74
260	3	0	1	2	1	0	36.85
261	1	0	0	3	1	1	19.48
262	2	0	0	2	0	0	36.98
263	3	0	1	0	0	0	34.49
264	2	0		2	0	1	12.07
265	3	1		2	0	1	1.77
266	0	0	0	1	0	1	10.39
267	3	0	1	2	1	1	2.95
268	0	0	0	1	0	0	13.8
269	0	0	1	3	1	0	37.61
270	3	0	0	0	0	1	1.77
271	1	0		0	0	0	37.67
272	0	0	0	3	1	1	7.64
273	3	0	1	2	1	1	10.03
274	3	1	1	2	0	1	2.95
275		1	0	3	0	1	11.02
276	3			0	0	0	5.48
277	3	0	0	2	0	1	2.98
278	3	0	1	0	0	1	2.66
279	3	1	1	0	0	1	1.7
280	2	0	0	2	0	1	11.08
281	2	1	0	2	0	1	9.61
282	3	0	0	3	1	1	23.44
283	2	0	0	0	0	1	23.74
284	2	1	1	2	0	1	8.79
285	1	0	0	1	0	0	38.49
286	2			2	1	1	31.9
287	3			0	0	0	0
288	2	0		0	0	1	7.11
289	3	1	1	2	0	1	8.1
290		1		3	0	1	11.54
291	3	1	1	2	0	1	2.66
292	0	0	0	1	0	0	38.95
293	3	0	0	2	1	1	6
294	3	0	1	2	1	1	6.07
295	2	1	0	2	0	1	25.8
296	2	1		1	0	0	1.8
297	0	0		0	0	1	7.08
298	3	1	0	0	0	1	0
299				3	1	0	37.61
300	0	1	0	1	0	0	38.75
301	1	1	0	3	1	0	39.84
302	3			2	1	1	36.52
303	3	1		0	0	1	12.89
304	2	0	0	3	0	1	3.9
305	1	0		3	1	0	7.87
306	1	0	1	0	0	1	10.26
307	0	0	0	1	0	0	9.34
308	0	0	0	3	1	1	31.41
309	2	1	1	2	0	1	14.1
310			0	0	0	1	22.2
311	1	0	0	3	1	0	40.13
312	1	0	0	1	0	1	6.43
313		1		0	0	0	0
314	3	1	1	2	1	1	0.95
315	3	0	1	2	1	1	14.46
316	2	1	0	2	0	1	7.44
317	2	0	0	2	0	0	0
318	2	1	1	2	0	0	9.18
319	2	0		2	0	1	17.44
320	3	0	1	0	0	1	2.66
321	2	1		0	0	1	12.56
322	3	0	0	2	1	0	40.43
323	3	0	1	2	0	1	2.72
324	3	0	1	3	1	0	12.56
325	3	0	1	2	1	1	3.28
326	3	0	1	0	0	1	5.08
327	2	1		2	0	1	7.31
328	2	1	0	0	0	1	21.8
329		0		0	0	1	0
330	2	1	0	2	0	1	17.11
331	1	0		1	0	1	13.02
332	2	1		2	0	1	2.56
333	2	0	1	2	0	1	7.28
334	0	1	0	1	0	1	28.23
335	1	1	0	0	0	1	15.34
336	3	0	1	2	1	1	16.85
337	2	1		0	0	1	6.79
338	2	1	1	0	0	1	6.98
339	2	1	0	3	1	1	11.84
340	3	1	0	0	0	1	4.33
341	0	1	0	1	0	1	0
342	3	1		2	0	1	1.8
343	2	0		0	0	1	1.08
344	1	1	0	1	0	0	42.13
345	0	1	0	1	0	1	13.15
346	1	1	0	0	0	1	3.51
347	2	0		2	0	0	0
348	1	0	1	3	1	1	23.57
349	1	0	0	2	0	1	34.39
350	1	0	1	2	0	1	5.11
351				3	1	1	36.95
352	2	1	0	2	0	1	21.08
353	2	1	0	0	0	1	12.98
354	1	0		0	0	0	43.05
355	1	0	0	1	0	1	3.31
356	3	1		2	0	0	0.46
357	1	1	0	1	0	1	15.18
358	2	0	0	2	0	0	43.05
359	2	0	0	0	0	1	2.66
360	2	1		0	0	1	18.2
361	0			0	0	0	43.18
362	3	0	0	2	1	1	22.36
363	3		0	2	1	1	0
364	2	0	0	2	1	1	35.11
365	0	0	1	3	0	0	48.85
366	2	1	0	2	0	1	4.85
367	3	0		0	0	1	3.28
368	2	1		0	0	0	43.77
369	3	1	1	0	0	1	1.93
370		0	0	2	1	1	0
371	2	0	1	2	0	1	12.13
372	2	0		2	0	1	7.7
373	2	0	0	2	0	1	3.11
374	3			2	1	1	6.39
375	2	1	1	0	0	1	12.07
376	3	1	1	2	0	1	5.02
377	1	0	1	3	1	1	16.98
378	0	1	0	0	0	1	7.25
379	2	0		2	0	1	19.64
380				3	1	0	22.79
381	3	0	1	2	1	1	4.95
382	2	1	1	0	0	1	5.21
383	2	0	0	2	0	1	0
384	2	0	1	2	0	1	8.13
385	2	0	0	2	1	1	12.98
386		0	0	2	1	0	25.87
387	3	1	0	2	0	1	0
388	1	1	1	2	1	1	4.16
389	2	1	0	0	0	1	3.15
390	2	1	0	2	0	1	3.8
391	3	0		0	0	1	3.77
392	2	1		0	0	1	2.03
393	2	1	1	2	0	1	5.18
394	3	1	1	0	0	1	7.44
395	2	0	0	2	1	1	18.95
396	2	1	0	2	0	1	11.41
397	1	0		2	1	1	9.9
398	2			3	1	1	13.93
399	1	0	1	1	0	0	46.98
400	2	1	0	0	0	0	0
401	3	1	1	2	0	1	4.36
402	1	0		1	0	0	47.05
403	2	1		0	0	1	8.3
404	0	1		0	0	0	1.87
405	2	0	0	0	0	1	0
406	3	0	0	2	0	1	4.36
407	2	1		0	0	1	6.72
408	3	1	1	2	0	1	3.05
409	2	1	0	0	0	1	10.23
410	2	0	0	2	1	1	9.31
411	2	1	0	2	0	1	11.74
412	3	1	0	2	0	0	18.56
413	2	0		2	0	1	7.77
414	3	0	0	2	1	1	9.61
415	2	0	0	2	0	1	4
416	2	0	0	2	0	0	24.03
417	2	0	0	2	1	1	23.34
418	2	0	0	2	0	1	28.59
419	2	0	1	0	0	1	23.34
420	2	0	0	0	0	1	12
421	1	0	0	3	0	1	13.67
422	2	1	0	0	0	1	37.48
423	2	0	0	2	0	1	0
424	3	1	0	2	0	1	3.9
425	2	0	0	0	0	1	2.98
426	2	0		0	0	1	5.18
427	1	0	0	1	0	0	48
428	0	0		1	0	0	47.51
429	1	1		0	0	1	23.34
430	3	0	0	2	0	1	9.64
431	2	0		1	0	1	14.13
432	3	0	1	0	0	1	3.05
433	3	0	0	2	1	1	3.93
434	3	0		2	0	1	4.2
435	3	0		3	0	1	5.05
436		1		0	0	0	3.9
437	1	1		3	0	0	49.54
438	2	1	1	2	0	0	0
439	3	0	0	2	1	1	13.11
440	2			3	1	1	8.89
441	3	0	1	2	1	1	27.87
442	2	1	1	0	0	1	7.41
443	3	1		0	0	1	3.31
444	1	0	0	1	0	1	7.54
445	2	1	0	2	0	1	4.79
446	0	1	0	3	1	1	35.54
447	3			2	1	1	2.07
448	3	0	1	0	0	1	7.51
449	2	0		2	0	1	5.15
450	0			0	0	0	10.23
451	2	0		2	0	0	25.67
452	0	0	0	0	0	1	6.3
453	1	1	1	0	0	1	1.64
454	1	1	1	2	0	1	3.48
455	1	1	0	1	0	0	51.48
456	1	0	1	1	0	1	13.64
457	2	0	1	2	0	1	6.33
458	2	0	0	0	0	0	0
459	2	1		2	0	0	1.57
460	3	0		2	0	0	10.13
461	2	0	0	2	0	1	3.77
462	0	0		1	0	1	25.7
463	2	0	1	2	0	1	0
464	2	1	1	0	0	1	15.74
465	2	1	1	1	0	0	7.61
466	2	0		2	0	1	12.92
467	2	1	0	2	0	1	0
468	2	1	1	2	0	1	12.16
469		0	0	3	0	1	12.49
470	2	0	0	2	0	1	12.36
471	2	0	1	2	0	1	24.56
472	2	0	1	2	0	0	0.46
473	2	0		0	0	1	1.8
474	2	0	1	3	0	0	17.61
475	1	0	1	1	0	1	16.52
476	3			0	0	1	3.77
477	3	0	1	2	1	1	0
478	2	0		2	1	1	5.8
479	3	0	1	2	1	1	6.16
480	1	1	0	0	0	1	10.3
481	3	0		2	1	1	7.28
482	3	1		2	0	0	1.61
483	2	1	0	0	0	0	0
484	3	1	1	2	1	1	13.74
485	1	1	1	0	0	1	3.74
486	2	0		2	0	1	6.89
487	2	1	1	2	1	1	2.75
488	2	1		0	0	1	9.9
489	2	1	0	2	0	1	18.85
490	2	1	0	2	0	1	0
491	2	1	0	2	0	1	7.34
492	2	1	0	2	0	1	0
493	3	0	1	2	0	1	3.38
494	2	1		0	0	0	0
495	2	1	1	0	0	0	0.98
496	2	1	1	2	0	1	6.52
497	3	0	0	0	0	1	21.18
498	3	1	1	2	0	1	8.92
499	0	1	1	2	0	1	0
500	0	1	0	2	0	1	34.69
501	2	1	1	2	0	1	20.72
502	2	0		2	0	1	3.97
503	3	0		0	0	1	14.82
504	2	1		0	0	1	1.9
505	0	0	0	1	0	1	41.84
506	2	0	0	2	0	0	0
507	0	0	0	3	1	0	55.21
508	3	0		0	0	1	6.2
509	3	0	1	0	0	1	4.75
510				3	0	1	0
511	2	0	0	0	0	1	19.8
512	3	0		0	0	1	1.15
513	2	0	0	2	0	1	6.89
514	2	1	1	0	0	1	8.26
515	2	0		0	0	1	0
516	3	0		0	0	1	3.25
517	2	0	0	2	0	1	35.41
518	2	1	0	2	1	1	10.52
519	0	0	0	1	0	1	8.33
520	1	1	1	3	0	1	16.49
521	2	1		2	0	1	4
522	2	0		0	0	0	56.85
523	3	0	0	2	1	1	27.18
524	3	0		2	0	1	5.15
525	1	0		0	0	1	33.11
526	2	1	0	2	0	1	6.43
527	3	0	1	0	0	1	6.46
528	3			2	1	1	10.79
529	2	1	1	2	0	1	20.56
530	3	1	1	0	0	0	5.08
531	2	0	1	2	0	0	0
532	2	1	1	2	1	1	5.57
533	2	0		0	0	1	3.11
534	2	0	0	2	1	1	3.18
535	1	0	0	1	0	1	7.84
536	2	1	1	0	0	1	2.13
537	2	0	0	0	0	0	12.66
538	3	1	1	2	0	1	13.61
539	2	0	0	2	0	1	26.92
540	3	0		2	1	1	17.25
541	2	1	1	2	1	1	6.3
542	2	0	1	2	0	0	0
543	2	1	0	2	0	1	50.92
544	3	1		0	0	1	4.39
545	3	0	0	2	1	1	5.77
546	3	0	0	0	0	1	7.7
547	2	1		2	0	1	8.66
548	3	1	1	2	0	1	12
549	2	0	0	2	1	1	11.67
550	2			0	0	1	7.97
551	0	0	0	3	1	1	0
552	2	0	1	0	0	1	12.16
553	0	0	1	3	1	1	33.41
554	2	0		0	0	1	3.41
555	2	0	0	0	0	1	10.66
556	3	0	1	2	1	1	7.41
557	2	0	0	0	0	1	16.82
558	3	1	0	0	0	1	8.72
559	0			3	1	0	6.23
560	3	0		0	0	1	0
561	2	0	1	2	1	1	3.11
562	3	1	0	2	0	1	1.9
563	2	0	1	3	1	0	16.75
564	3	0		2	0	1	3.31
565	2	0	1	2	0	1	12.26
566	3	0	1	3	1	1	11.28
567	3	1	1	0	0	1	1.84
568	2	0	0	2	1	1	24
569	3	0	1	0	0	1	0
570	2	1	0	2	1	0	0
571	2	1	1	2	0	1	5.9
572	0	0	1	3	1	1	55.97
573	2	1	1	2	0	1	7.31
574	2	1	0	2	1	1	23.25
575	0	0	1	3	1	0	0
576	2	0	1	2	0	1	5.48
577	3	0	1	0	0	1	4.23
578	1	0	1	3	1	1	0
579	0	0	0	3	1	0	50.56
580	3	0	1	2	0	1	3.7
581	3			0	0	1	2.92
582	3	0	0	2	1	0	11.93
583	1	0	0	3	1	0	0
584	3	0	0	2	0	1	3.02
585	2	1	0	0	0	0	0
586	3	0	0	2	1	1	0
587	3	1		0	0	1	7.74
588	1	1	0	1	0	0	18.26
589	3	1		0	0	0	0
590	2	1	0	2	0	1	7.67
591	2	1	1	2	0	1	28.79
592	2	1		0	0	1	2.95
593	2	0	0	2	0	1	6.95
594	1	0	0	3	1	1	19.8
595	2	0	0	0	0	0	0
596	2	1	0	2	0	1	42
597	2	1	0	2	1	1	22.43
598	3	0	0	0	0	1	1.31
599	2	1	0	0	0	1	4.89
600	0	1	1	3	1	1	33.84
601	2	1		0	0	1	6.1
602		1		0	0	0	0
603	1	1	0	1	0	1	13.25
604	2	1	0	2	0	1	13.44
605	3	1	1	0	0	1	2.98
606	1	0	1	0	0	1	5.84
607	2	0		2	0	1	33.61
608	2	0	0	2	0	1	12.07
609	3	1	0	2	0	1	14.66
610	3	0	0	0	0	1	2.03
611	2	0	0	2	0	1	2.43
612	3	1	0	0	0	1	1.11
613	3	1		2	0	1	6.52
614		0	0	1	0	1	4.79
615	3	1	1	2	1	0	0.33
616	2	0		2	0	1	10.82
617	3	0	1	2	0	1	4.98
618	3	0	1	2	1	1	0
619	2	0	1	2	0	1	10.39
620	2	1		0	0	1	7.25
621	3	0	0	2	1	1	0
622	1	1	0	1	0	1	5.97
623	3	0	1	2	0	1	3.51
624	2	1	1	2	0	1	0
625	2	0	0	2	0	1	6.59
626	3	1		2	0	1	2.85
627	3	0	1	2	0	1	2.3
628	3	0	1	2	1	1	2.92
629	1	1	0	3	0	1	11.08
630	2	0		2	0	1	47.54
631	2	1	0	2	0	1	6.33
632	3	0	0	2	1	1	14.82
633	2	1	0	0	0	1	22.2
634	2	0		2	0	1	61.51
635	2	1	0	0	0	0	0
636	2	0	0	2	0	1	31.21
637	3	0		2	0	1	10
638	3	0	0	2	1	0	0
639	2	0	0	2	1	1	17.64
640	2	1	1	0	0	1	5.64
641	2	0	1	2	1	1	6.3
642	2	0		3	1	1	0
643	2	1	0	0	0	1	2.98
644	3			2	1	1	6.3
645	2	0	0	0	0	1	11.05
646	2	1	1	2	0	1	6.56
647	2	1	0	1	0	1	7.21
648	3			2	0	0	1.84
649	2	0	0	2	0	0	0
650	2	0	1	1	0	1	17.28
651	3	1		0	0	1	1.05
652	1			3	1	1	40.95
653	3	0	0	2	1	1	6.3
654	3	0	1	2	1	0	0
655	1	0		3	1	1	0
656	3	1	1	2	0	0	1.18
657	2	1		0	0	1	6.46
658	0	1	0	3	1	0	0
659	1	0	0	1	0	1	59.61
660	0	1	0	0	0	0	0
661	2	0	0	0	0	1	5.64
662	2	1	1	0	0	1	1.8
663	3	0	0	2	0	1	5.02
664	3	0	1	2	1	1	7.87
665	1	1	0	1	0	0	70.75
666	0			3	1	0	71.08
667	2	1	0	0	0	1	12.23
668	2	1	1	0	0	1	34.1
669	3			2	1	1	10.95
670	1	0	0	3	0	0	8.89
671	2	1	1	2	0	1	5.54
672	2	0	0	2	0	1	22.56
673	3	0	0	2	1	1	5.57
674	3	0	0	2	0	1	4.66
675	3	0	1	2	0	1	1.64
676	2	0	1	2	0	1	8.49
677	3	0	0	1	0	1	3.74
678	3	0	1	3	1	1	9.9
679	1	0	0	1	0	1	12
680				0	0	1	12
681	2	0	1	2	0	1	4.49
682	0	0	0	3	1	1	48.26
683	2	1	0	0	0	1	3.31
684	3	0	0	0	0	1	2.89
685	2	1	1	2	0	0	0
686	3		1	2	1	0	6.23
687	3	0	0	2	0	1	2.2
688	3	1	1	2	0	1	4.1
689	3	0		2	0	1	5.97
690	1			3	1	1	63.21
691	3	1		2	0	1	22.92
692	0	0	0	3	1	1	50.52
693	2	1	1	2	0	1	0
694	1	0	0	1	0	1	21.18
695	3	0	1	2	1	1	7.7
696	3	1	1	2	0	1	2.39
697	3	0	1	2	1	1	11.28
698	2	1	1	0	0	0	1.44
699	2	1	1	2	0	0	0
700	2	0	1	2	0	1	2.89
701	2	0	1	2	0	1	6.85
702	2	0	1	0	0	1	12.03
703	2	0	0	2	0	1	16.1
704	3	0		0	0	0	0.16
705	2	1	0	2	0	1	3.15
706	2	1	0	0	0	1	12.26
707	2	1	0	0	0	1	1.57
708	2	0	0	2	1	1	32.2
709	0	0	0	1	0	0	75.31
710	2	0		2	0	1	14.49
711	2	1	1	2	0	1	28.69
712	3			0	0	1	1.74
713	2	0	0	0	0	1	19.87
714	2	0	0	2	0	1	0
715	3	1		2	0	1	10.82
716	3	0		2	0	1	3.28
717	2	1	0	0	0	0	0
718	3	1		0	0	1	5.51
719	3	1		2	0	1	9.48
720	3	0	1	2	1	1	4.16
721	3	0	1	2	0	1	10.26
722	3	0	0	2	1	1	8.39
723	3	1	0	2	1	1	5.44
724	2	0		1	0	1	11.64
725	2	0	0	2	1	1	0
726	2	1	1	2	0	1	6.75
727	3	0	0	2	1	0	75.41
728	1	1	1	2	0	1	11.97
729	2	0		2	0	1	23.8
730	1	1		0	0	0	0
731	3	1		2	0	1	13.21
732	2	0	0	0	0	1	8.33
733	2	0	1	2	0	0	0
734	3	1	0	2	0	1	27.11
735	3	0	1	2	0	1	11.67
736	2	1	1	2	0	1	9.57
737	0	1	0	1	0	0	76.46
738	2	0		2	0	0	0
739	3	1		2	0	0	0
740	2	0	1	2	0	1	7.11
741	2	1	1	2	0	0	0
742	2	1	1	2	0	1	20.3
743	2	0	0	2	0	0	0.46
744	2	0	0	2	0	0	0
745	2	0	0	0	0	0	9.02
746	2	0	0	2	0	1	0
747	2	0	0	3	1	1	23.44
748	2	1	1	0	0	1	13.51
749	2	1	1	2	0	1	16.13
750	2	0	0	2	0	0	0
751	3	1	0	2	1	1	14.92
752	3	1	1	0	0	0	0
753	3	1	1	2	1	1	3.8
754	1	0		1	0	1	4.23
755	2	1	0	2	0	0	0
756	2	0		2	0	1	10.13
757	2			0	0	1	0
758	2	1	0	0	0	0	6.1
759	3	0	1	2	1	0	0
760	2	0		2	0	1	37.44
761	3	0	1	0	0	1	1.48
762	2	0	0	2	0	1	5.7
763	2	1	1	0	0	0	0
764	2	1		0	0	1	21.67
765	2	1	0	0	0	1	0
766	3	0	0	2	1	1	7.84
767	2	1		2	0	1	7.15
768	2	1	1	2	1	0	6.46
769	3	0	1	2	0	0	0.95
770	2	1		2	0	1	22.43
771	0	1	0	1	0	0	2.72
772	2	0	0	2	0	1	0
773	3	1	0	0	0	0	0.46
774	1	0	1	3	1	1	5.08
775	2	1	1	0	0	1	14.95
776	2	1	0	2	0	1	4.16
777	2	0		2	0	1	3.08
778	3	0	1	2	1	1	3.11
779	0	1	1	1	0	1	15.11
780	2	1	0	2	1	0	10.69
781	2	1	0	2	0	1	11.64
782	3			2	1	0	4.39
783	2	0		0	0	0	6.33
784	2	1	1	2	1	0	5.64
785	3	0	0	2	0	1	7.84
786	2	0		2	0	1	0
787	3	0		2	0	0	8.89
788	2	1	0	2	0	0	5.74
789	0	1	0	0	0	1	7.77
790	2	1		2	0	1	1.97
791	3	0	1	2	0	1	6.07
792	2	0		2	0	1	15.25
793	2	0	0	2	1	1	8.33
794	2	0	1	2	0	0	1.25
795	2	1	0	0	0	1	4.46
796		0		3	1	0	0
797	2	0	0	2	0	1	2.49
798	2	0	0	0	0	1	53.7
799				3	1	0	33.9
800	0	0	0	1	0	0	81.15
801	0	0		1	0	1	17.02
802	2	1	0	2	0	0	81.15
803	2	0	0	2	1	0	7.44
804	1		0	3	1	0	78.36
805	2	0	0	0	0	1	10.59
806	2	1		2	0	1	8.62
807		0	1	2	1	1	5.61
808	2	0	0	2	0	0	81.7
809	2	1	0	3	1	0	6.49
810	2	1	1	1	0	0	17.21
811	3	1	0	0	0	0	7.57
812	2			3	1	1	3.97
813	3	0		2	1	1	7.64
814	1	0		0	0	1	5.25
815	2	1	1	2	0	1	26.39
816	2	0	0	3	1	1	4.52
817	3		0	2	1	0	3.34
818	2	1		2	0	0	2.59
819	2	1	0	0	0	0	0
820	3	0	0	2	0	1	3.84
821	2	1	0	2	1	0	0
822	2	0	1	2	1	1	13.48
823	2	0	0	1	0	1	12.52
824	2	1	1	2	0	1	8.52
825	3	0	0	1	0	1	2.03
826	2	1	0	2	0	0	5.97
827	1	0	0	1	0	1	18.1
828	3	0	1	2	0	1	7.18
829	2	0	0	2	0	1	6.16
830	3	0		3	1	0	0
831	3	1	1	2	1	1	4.1
832	2	1	1	2	0	0	0.2
833	2	0	1	2	0	1	0
834	2	0	1	2	0	1	10.79
835	3	1	1	3	0	1	0
836	2	1	1	2	0	1	8.62
837	3	1	1	0	0	1	0
838	2	1	1	2	0	1	3.97
839	2	1	0	1	0	1	10.79
840	3		0	0	0	0	1.87
841	1	1		2	0	0	0
842	1	1	0	0	0	1	12.16
843	3	0	0	2	1	1	57.74
844	3	0	1	2	1	1	8.52
845	2	1	0	2	1	0	1.57
846	3	0	1	0	0	1	0
847	2	1	1	2	0	1	9.48
848	3	0	0	2	0	1	20.33
849	3	1	0	2	1	1	5.67
850	3	0	1	2	0	1	9.61
851	3	0		2	0	0	1.8
852	2	1	1	2	0	1	0
853	1	0	1	1	0	1	7.7
854	0	0	1	1	0	1	34.26
855	1	1	1	0	0	0	0.36
856	0	0	0	3	1	0	0
857	3	0		0	0	0	0.59
858	2	0	1	0	0	0	21.11
859	3	0	1	2	0	0	4.72
860	2	1	0	2	0	1	10.13
861	0	1	0	2	0	1	0
862	2	0	1	2	0	0	0
863	1	0	0	1	0	1	11.48
864	2	1	0	0	0	1	4.39
865	3	0		2	0	1	11.54
866	3	0		0	0	1	11.02
867	2	0	1	2	0	1	2.79
868	3	0	0	2	1	1	0
869	2	1	0	2	0	1	11.28
870	3			3	1	1	9.48
871	2	1		0	0	1	3.84
872	0	1	0	1	0	1	84.2
873	3	1		2	0	1	11.44
874	3	1	0	2	1	1	0
875	2	1		2	0	0	0
876	2	0	0	2	1	1	35.48
877	2	1	0	2	0	1	0
878	3	1	1	1	0	1	5.41
879				3	0	1	9.25
880		0		2	0	1	8.33
881	0	0	1	1	0	1	24.39
882	3	0	1	2	0	1	20.85
883	1	0	0	0	0	0	58.52
884	2	1	0	1	0	0	1.44
885	3	0	1	2	1	1	3.97
886	2	0	1	2	0	0	0
887	3	0	1	2	1	1	5.48
888	3	0	0	1	0	0	4.98
889	3	1	0	2	1	1	2.98
890	0	1	0	1	0	1	13.84
891	2	1	1	2	0	1	13.28
892	2	0	1	2	0	0	2.89
893	3	0	1	0	0	1	11.7
894	3			0	0	0	0.39
895	3	0		2	0	1	4.16
896	1	1	1	1	0	0	0.75
897	0	1	0	0	0	1	9.15
898	0	1	1	1	0	0	46.2
899	2	0	0	0	0	0	0
900	2	0		2	0	1	5.54
901	2	0		2	0	0	6.56
902	0	0		1	0	1	70.52
903	3	0		0	0	0	0
904	3	1		2	0	0	2.59
905	3	0	1	2	0	0	1.38
906	3	0	1	2	0	1	5.21
907	2	0	0	2	0	1	10
908	2	1	1	1	0	0	16.98
909	3	0	0	2	0	0	4.89
910	1	0	0	1	0	1	47.05
911	2	1	0	0	0	0	11.34
912	3	0		2	0	0	0
913	3	0	1	2	0	1	7.31
914	2	1	0	2	1	1	25.74
915	2	0	0	2	0	1	7.38
916	3	0	0	0	0	1	0
917	3	1		2	0	1	9.41
918	2	0	0	2	0	1	7.87
919	2	1		0	0	0	0
920	1	0	0	0	0	0	88.85
921	3	0	1	2	0	1	3.61
922	0	0	0	0	0	0	31.67
923	0	1	0	0	0	1	0
924	1	0	1	1	0	0	7.57
925	3			2	0	1	38.43
926	1	0	0	0	0	0	0.49
927	2	0	0	2	0	1	14.72
928	3	0		2	1	0	0
929	3	1	0	0	0	0	4.49
930	3	1	1	2	0	1	4.1
931	2	0		2	1	0	3.67
932	3	0		0	0	1	7.25
933		1	1	0	0	1	5.15
934	3	0		0	0	1	1.84
935		1		0	0	0	0.46
936	2	0	0	2	0	1	19.44
937	2	0	0	2	0	1	7.9
938	3	0		0	0	0	1.93
939	2	1		2	0	0	0
940	2	1	0	2	0	1	14.43
941	3	0	0	2	0	0	1.21
942	0	0	0	3	0	1	11.34
943	2	0	0	0	0	1	16.82
944	1	0	0	1	0	1	20.36
945	3	0		2	1	0	5.51
946	3	1	1	2	0	1	0
947	3	0	1	2	1	1	8.39
948	3	1	1	0	0	1	6.56
949	3	1		0	0	1	0.85
950	0	1	0	1	0	1	9.28
951	2	0	0	0	0	0	0
952	3	0	0	2	1	1	17.64
953	3			2	1	0	3.41
954	3	1	1	2	0	0	3.51
955	2	0	0	2	0	0	22.16
956	2	0	1	2	0	0	0
957	0	1	0	3	1	0	92.52
958	1	0	0	1	0	1	35.64
959	3	0	1	0	0	1	0
960	2	1	1	1	0	1	10.89
961	3	0		2	0	1	2.75
962	1	1	0	3	1	1	27.87
963	3	1	1	2	1	1	42.3
964	2			2	1	0	14.92
965	2	0		2	0	1	18.66
966	2	1	0	2	0	1	6.89
967	3		0	2	1	1	4.07
968	0	0	1	0	0	1	29.31
969	2	0	0	2	0	1	18.43
970	3	0	0	3	1	0	15.34
971	3	0		2	1	1	4.2
972	1	1	1	1	0	1	5.11
973	0	1	0	1	0	0	61.77
974	3	0	0	2	1	0	0
975	0	1		1	0	1	13.34
976	2	1	0	2	0	0	13.31
977	2	1	1	2	0	0	4.56
978	2	1	0	0	0	1	0
979	2	1	1	0	0	1	8.26
980	3	0	1	2	1	1	0
981	2	1	1	2	0	0	0
982	3	1	0	2	1	1	0
983	2	1		2	0	1	5.48
984	3	0		2	1	0	5.15
985	2	1		0	0	0	0
986	1	1	0	3	0	0	4
987	2	0	0	0	0	1	11.57
988	2	0	1	2	0	1	0
989	2	0	0	2	1	1	6.43
990	2	1	0	2	0	1	7.93
991	3	0		3	0	0	3.7
992	2	0	0	2	0	0	0
993	2	1	0	0	0	1	13.15
994	2	1	1	0	0	1	0
995	0	0	0	1	0	1	21.38
996	2	1	0	0	0	0	6.72
997	1	0	0	2	0	0	95.8
998	3	1		0	0	1	2.89
999	3	1	0	2	0	0	0.23
1000	3	1	0	2	0	1	2.16
1001	1	0	0	3	1	0	96.26
1002	2	0	1	2	0	1	0
1003	3	1	1	2	0	0	1.57
1004	3			2	0	1	22.75
1005	0	0		1	0	0	37.74
1006	2	0	0	2	0	1	13.61
1007	3	0		2	1	0	0.98
1008	2	1	0	0	0	1	22.49
1009	2	1		2	0	1	7.67
1010	3		0	0	0	1	10.3
1011	0	1	0	1	0	1	5.87
1012				2	1	0	121.87
1013	2	1	0	0	0	1	7.9
1014	2	0	0	2	0	1	2.85
1015	3	0		2	0	1	0
1016	2	1	0	2	0	1	3.08
1017	3	0	0	0	0	1	8.52
1018	3	0		2	0	0	6.56
1019	3	1	1	2	0	1	11.18
1020		1		0	0	0	0
1021	3		0	3	1	1	13.11
1022	2	0	0	2	0	1	12.39
1023	3	1		1	0	1	3.67
1024	2	1		2	1	1	5.34
1025	1	0	0	3	1	1	8.56
1026	1	1		1	0	1	10.89
1027	2	0	0	2	1	1	30.92
1028	2	1	1	0	0	1	0
1029	2	1	1	2	0	1	11.9
1030	3	0		0	0	1	9.11
1031	2	1	1	0	0	1	6.36
1032	2	1		2	1	1	11.64
1033	3	1		2	1	1	2.16
1034	2	1	0	2	0	1	5.51
1035	3	0	1	2	1	1	4.2
1036	3	0		2	0	0	1.02
1037	2	1	0	2	0	0	0
1038	3	0		2	1	0	6.79
1039	3	1	1	2	1	1	5.7
1040	3	0	1	2	1	1	2.59
1041	2	0	0	2	0	0	0
1042	2	1		0	0	0	0.95
1043	3	0	1	2	0	1	0
1044	3	1		2	0	0	0.98
1045	2	1		1	0	1	10.66
1046	3	0	0	0	0	1	23.67
1047				2	1	1	21.8
1048	3	0		2	0	1	9.87
1049	2	0	1	2	0	0	14.36
1050	3	0		2	1	1	3.38
1051	2	1	1	2	0	0	0
1052	2	1	0	0	0	1	0
1053	0	1	1	0	0	1	14.72
1054	3	0	0	0	0	1	5.77
1055	2	1	1	2	0	0	0
1056	0	1	0	1	0	1	8.52
1057	3			2	1	1	5.57
1058		0		0	0	1	9.7
1059	2	1	0	2	0	1	7.7
1060	3	1	1	2	0	1	2.98
1061	3	1	1	0	0	0	0
1062	1	0	0	1	0	1	75.28
1063	2	0	1	0	0	1	6.07
1064	2	1	0	2	1	0	43.8
1065	2	1	0	2	0	1	6.52
1066	2	1	0	0	0	0	0
1067	1	1	0	1	0	1	51.38
1068	3	0	1	2	1	0	0
1069	3	1		3	1	1	0
1070	3	1		0	0	0	0
1071	3	0	1	0	0	1	11.8
1072	1	0	1	3	1	1	40.52
1073	1	0	0	0	0	0	0
1074	3	0	0	2	1	1	3.51
1075	2	0	0	2	0	1	1.8
1076		0	1	2	0	0	1.31
1077	2			0	0	0	4.07
1078	2	1	0	0	0	0	0
1079	2	1	0	0	0	1	9.38
1080	0	0	0	1	0	0	103.18
1081	3	1		2	0	1	5.21
1082	3	0	1	0	0	0	0
1083	2	0		2	0	1	6.39
1084	3	0	1	2	0	0	1.15
1085	2	1		0	0	1	4.16
1086	1	1	0	1	0	0	0
1087	3	0	1	2	1	1	7.02
1088	2	1		0	0	1	16.13
1089	2			0	0	0	11.67
1090	3	0	1	2	0	1	3.9
1091	2	0		0	0	1	40.07
1092	2	0	0	2	0	0	5.51
1093	2	1	1	2	0	1	8.89
1094	0	0		3	1	0	7.34
1095	3	1	1	2	0	1	2.46
1096	1	0	0	0	0	0	0
1097	2	0		2	0	0	1.44
1098	2	0	0	0	0	0	0.23
1099	3	1		1	0	0	2.2
1100	3	0		2	0	1	6.16
1101	1	0	0	3	0	0	5.34
1102	3	1	1	0	0	1	5.31
1103	2	0		0	0	1	10.36
1104	1	1	0	3	0	1	5.41
1105	3	0	0	2	1	1	13.48
1106	2	1	1	0	0	0	11.25
1107	3	0	1	2	0	0	1.48
1108	3	1	1	2	0	0	3.18
1109	2	1		2	0	0	0
1110	3	1		0	0	1	1.48
1111	3	0	1	2	0	1	2.62
1112	3	1		2	0	1	0
1113	3	0		2	0	0	5.57
1114	2	0	0	0	0	1	0
1115	3	0	0	2	1	0	0
1116	1	0	0	1	0	1	9.77
1117	0	0		0	0	1	0
1118	3	0	0	2	1	0	0
1119	3	1		0	0	1	4.92
1120	3	0	0	0	0	0	2.56
1121	2	1		3	0	1	8.3
1122	3	0	1	2	0	1	1.28
1123	3	0	1	2	1	1	5.97
1124	3	0	1	2	0	0	1.15
1125	2	0		0	0	0	0.16
1126	3	1	1	2	0	1	6.16
1127	3	1	1	0	0	1	2.07
1128	2	0	0	0	0	0	0
1129	3		0	0	0	1	1.84
1130	3	0	1	2	0	1	19.84
1131	3	1	0	0	0	0	0
1132	3			2	1	0	10.03
1133	3	0		2	1	0	0
1134	3	0		2	0	1	10.59
1135	1	1	0	1	0	0	7.61
1136	1	1	1	1	0	0	37.74
1137	2	0	0	2	0	0	3.51
1138	1			3	1	1	17.05
1139	3	1		2	0	1	1.31
1140	2	0	0	0	0	1	24.1
1141	2	0	1	0	0	1	3.31
1142	2	0		2	0	0	0
1143	3	1		0	0	1	2.3
1144	1	0		0	0	0	0.23
1145	3	0	0	2	1	1	4.3
1146	1	0	1	1	0	1	13.38
1147	2	1	0	2	1	0	7.7
1148	2	0	0	2	0	1	7.64
1149	2	0		2	0	1	62.52
1150	3	0	0	0	0	0	0.95
1151	1	1		0	0	1	11.7
1152	3	1		2	0	0	0
1153	2	1	1	0	0	1	15.05
1154	2	0	0	0	0	1	1.97
1155	3			0	0	1	1.87
1156	3	0	1	2	0	0	0
1157	3	1		2	1	1	3.57
1158	3	0	0	0	0	1	2.79
1159	0	0	0	1	0	1	29.28
1160	2			2	0	1	6.72
1161	3	0	1	0	0	0	0.2
1162	0	0	0	2	1	0	111.31
1163	1	0	0	1	0	0	4.46
1164	2	1	1	0	0	0	0
1165	3	0		2	0	1	13.21
1166	2	0	1	0	0	1	3.8
1167	2	0	0	0	0	1	5.8
1168	3		0	0	0	1	2.79
1169	3	1	0	0	0	0	0.85
1170	2	1		0	0	1	8.89
1171	3	1	0	0	0	0	0
1172	3	1	1	2	0	1	3.9
1173	3	0	1	0	0	1	3.54
1174	2	0	0	0	0	0	0
1175	3	0	0	2	1	1	5.25
1176	2	0	0	2	1	0	0
1177	2	1	1	0	0	0	0
1178	3	1	1	0	0	0	4.62
1179	3	1	1	2	1	1	14.16
1180	3	0	0	0	0	1	0
1181	3	1	0	3	1	0	4.36
1182	2	0	1	2	1	1	12.13
1183		1	1	0	0	0	0
1184	3	0	1	0	0	1	49.93
1185	2	1	1	0	0	0	0.98
1186	1	1	0	0	0	0	8.62
1187	3	0		2	1	0	0
1188	3	0	1	0	0	0	1.38
1189	3	0	1	2	0	0	0
1190	3	1	0	0	0	1	6.07
1191	2	0	1	0	0	1	8.13
1192	2	1	0	0	0	0	0
1193	1	0	0	1	0	0	1.54
1194	0	1	1	3	0	1	0
1195	0	1		0	0	0	0.3
1196	3	1	1	2	0	0	0
1197	2	0		1	0	1	2.59
1198	2	1	0	0	0	1	31.64
1199	2	0	1	0	0	0	0
1200	3	0	1	2	1	1	0
1201	2	0	1	0	0	1	6.85
1202	2	1	0	0	0	0	0
1203			1	0	0	0	0
1204	2	1	1	1	0	1	5.38
1205	3	1	0	0	0	1	5.38
1206	1	1	0	1	0	0	0
1207	1	1	1	0	0	1	5.54
1208	3	1	1	2	0	1	0
1209	3	1		2	0	1	2.82
1210	3	0	0	2	0	0	0
1211	3	1	1	2	0	0	0
1212	3	0	0	2	1	0	18.43
1213	3	0	0	2	0	1	5.28
1214	2	1	1	0	0	1	24.56
1215	1	0		3	1	0	19.7
1216	3	0	0	0	0	1	15.8
1217	2	1	1	0	0	1	3.18
1218	2	0	0	0	0	1	0
1219	3	0	1	2	0	0	0
1220	0	1	0	2	1	1	0
1221	3	0	0	2	0	1	3.15
1222	2	0	0	0	0	0	116.69
1223	2	1	0	1	0	0	1.51
1224	3	1	0	0	0	1	5.15
1225	2	1	0	0	0	0	0
1226	3	0	0	0	0	1	3.61
1227	2	1		0	0	0	0
1228	3	0		2	0	1	1.84
1229	0	0	0	3	1	1	82.43
1230	2	1	0	0	0	0	2.07
1231	3	1	1	2	0	1	7.77
1232	2	0	1	2	0	0	8.95
1233	2	1	0	0	0	1	0
1234	2	1	0	0	0	1	11.51
1235	3	1	1	2	0	1	1.67
1236	3	1	1	0	0	1	3.93
1237	3	1	0	0	0	0	0.75
1238	2	0	0	2	1	0	13.74
1239	3	1	0	0	0	0	24.36
1240	1	1	1	0	0	1	5.25
1241	0	1	1	3	1	1	0
1242	3	1	1	0	0	0	1.51
1243	2	1	1	0	0	1	5.61
1244	0	1	0	0	0	1	65.41
1245	2	0	1	0	0	1	19.57
1246	2	0	0	0	0	0	0.26
1247	3	0	1	0	0	1	1.93
1248	3			2	1	1	3.08
1249	0	0		1	0	1	0
1250	2	1	1	0	0	1	9.15
1251	2	0	0	0	0	1	13.7
1252	3	1	1	2	0	1	0
1253	0	0	0	0	0	0	121.08
1254		1		0	0	0	0.72
1255		0		3	1	0	3.21
1256	3	1	0	2	0	1	9.84
1257	2	0	0	2	1	0	7.61
1258	3	1	1	2	0	0	2.59
1259	3	0	0	2	0	0	3.64
1260	2	1	0	0	0	0	7.74
1261	2	0		0	0	0	0.33
1262	0	0		0	0	1	35.61
1263	2	1	0	0	0	0	1.44
1264	2	1	0	1	0	1	11.31
1265	2	1	0	0	0	1	8.36
1266	1	0	1	1	0	0	1.25
1267	3	1		2	1	0	3.02
1268	3	0	1	2	0	1	19.7
1269	3	0	0	0	0	1	3.84
1270	2	0	1	2	0	0	0.56
1271	2	0		2	1	1	56.23
1272	2	1	0	0	0	1	3.02
1273	0	1	0	0	0	0	0.72
1274	2	0	1	2	1	1	0
1275	2	1	0	0	0	0	1.93
1276	2	0	0	0	0	0	3.34
1277		1	1	0	0	1	2.1
1278	2	1	1	0	0	0	0.98
1279	2	1	1	2	0	0	1.34
1280	3	0	0	0	0	0	0.92
1281	2	0	0	2	0	0	6.3
1282	3	1	0	2	0	0	1.44
1283	3			0	0	0	0
1284	2	0	1	0	0	0	0.95
1285	1	0	0	1	0	1	23.11
1286	2	0	1	2	0	0	2.49
1287	3	0	1	2	1	1	2.75
1288	0	1	0	1	0	0	1.28
1289	2	1	1	0	0	1	12.23
1290	3	1	0	2	0	1	0
1291	3	0	1	2	1	0	19.7
1292	3	1	1	2	0	0	0.56
1293				3	1	1	0
1294	2	1	1	1	0	1	3.7
1295	3	0		3	1	1	12.69
1296	2	1	1	2	0	0	4.92
1297	3	0	1	2	0	1	12.85
1298	2	0	0	0	0	0	0.33
1299	2	1	0	0	0	1	26.66
1300	3	0	1	2	0	1	2.69
1301	2	1	1	2	0	1	9.97
1302	2	1	1	0	0	0	0.26
1303	2	0	1	0	0	1	12.62
1304	0	0	0	3	1	0	9.08
1305	1	0	1	0	0	0	0.2
1306	3	0	1	2	1	0	0.66
1307	2	1	1	0	0	1	0
1308	3	0	0	2	0	1	26.56
1309	2	0	0	0	0	1	14.82
1310	2	1	1	0	0	0	2.36
1311	3	1	1	2	0	1	4.79
1312	3	0	0	2	0	1	8.07
1313	2	0	0	0	0	1	5.84
1314	3	0	1	2	1	1	26.3
1315		1	1	0	0	1	28
1316	1		1	3	1	1	7.15
1317	2	1	1	0	0	0	1.38
1318	2	1	1	0	0	0	1.21
1319	2	1		2	0	0	0.52
1320	2	1	1	0	0	1	8.33
1321	3	0	1	2	1	1	21.28
1322	3	0	1	2	0	0	49.61
1323	0			3	1	0	21.8
1324	0	0	1	1	0	0	1.48
1325	3	0	0	2	1	0	1.57
1326	3	0	0	2	1	1	3.64
1327	3	0	1	1	0	1	9.18
1328	3	0	0	2	0	1	5.02
1329	1	1	0	3	0	1	24.46
1330	1	0	1	1	0	0	14.66
1331	2	1	1	0	0	0	2.56
1332	3	0	0	0	0	1	4.72
1333	2	0	1	2	0	1	17.15
1334	1	0	0	0	0	0	0.98
1335	3	1	0	0	0	0	0.82
1336	3	0	1	2	0	0	0.39
1337	2	1	0	2	0	1	7.11
1338	2	1	1	0	0	1	11.31
1339	3	1	0	0	0	0	120.59
1340	3	0	0	0	0	1	2.43
1341	2	1	1	0	0	0	0.98
1342	2			2	1	1	24.59
1343	3	0	1	2	0	1	4.23
1344	1	0		0	0	1	7.74
1345	0	0	0	0	0	1	0
1346	2	1	0	0	0	0	0.62
1347	3	0	1	2	0	0	0.26
1348	1	0	0	2	1	0	6.39
1349	3	1	0	2	1	0	1.44
1350	3	0		2	0	0	3.11
1351	2	0	1	2	1	1	47.38
1352	2	1	0	0	0	0	0.69
1353	2	1	1	0	0	1	6.26
1354	2	1	1	2	0	1	7.54
1355	3	0	1	1	0	1	2.85
1356	3	1		0	0	0	1.51
1357	2	0		2	0	1	7.87
1358	2	1	0	0	0	0	0.66
1359	2	0	0	0	0	0	0.69
1360	3	1	1	2	0	1	1.93
1361	2	0	1	2	0	0	1.97
1362	3	1	1	2	0	1	4.16
1363	2	1	0	2	0	0	4.56
1364	3	0	1	2	1	1	7.41
1365		0	0	3	1	1	15.97
1366	3	0	1	2	1	1	4.92
1367	0	1	1	2	0	1	6.85
1368	3	0		2	0	0	1.02
1369	3	0	0	2	0	0	21.8
1370	3	0	1	3	1	0	7.61
1371	2	1	0	0	0	0	2.85
1372	3	1		0	0	0	0
1373	0	0	0	1	0	0	24.33
1374	3	0	1	0	0	1	3.51
1375	2	1	0	0	0	1	2.23
1376	3	1	1	0	0	0	0.95
1377	3	1	1	0	0	1	1.64
1378	3	0	0	1	0	0	0.49
1379	0	0	1	3	0	0	33.08
1380	2	0	1	0	0	0	0.46
1381	2	1	0	2	0	0	0.23
1382	3	1	1	0	0	0	0.16
1383	2	1	1	2	1	0	131.97
1384	3	1	0	0	0	1	0
1385	2	1	1	2	0	0	0
1386	2	0	0	0	0	1	37.93
1387	3	0	1	2	0	0	0.33
1388	3	0	0	2	0	1	4.69
1389	3	1	1	2	0	0	6.3
1390	3	0	1	0	0	0	0
1391	2	0	1	0	0	1	37.74
1392	3	1	1	3	1	0	5.28
1393		1	0	0	0	0	49.77
1394	3	1	1	2	0	0	0
1395	0	1	0	3	1	1	6.66
1396	3	1	0	0	0	1	2.72
1397	3	0	0	2	1	1	9.31
1398	1	1		1	0	0	1.02
1399	3	0		2	0	1	7.31
1400	3	0	1	2	0	1	3.08
1401		1	1	2	0	1	9.51
1402	3	0	0	0	0	0	0.3
1403	0	1	1	3	1	1	6.36
1404	2	0	0	2	0	0	0.33
1405	2	0		0	0	1	0
1406	3	0	1	0	0	1	0
1407	3	1	1	2	0	1	3.54
1408				2	1	0	25.61
1409	3	1	1	0	0	1	1.21
1410	3	0	1	2	0	0	1.31
1411	1	0	1	3	0	1	7.9
1412	3	0	1	2	0	0	0.79
1413	0	1		1	0	0	28.39
1414	3	1	0	0	0	1	0
1415	3	0	0	0	0	1	0.72
1416	3	0		2	0	1	1.31
1417	2	1	1	0	0	1	0
1418	3	0	0	2	0	0	1.7
1419	2	1	0	0	0	0	0.23
1420	0	0	0	2	0	0	0.16
1421	2	1	1	0	0	1	4.52
1422	2	0	0	0	0	0	0.89
1423	3	0	1	2	1	1	3.8
1424	3	1	1	2	0	0	3.51
1425	3	1	0	2	0	0	0
1426	3	1	0	0	0	0	0.23
1427		1	0	0	0	1	67.57
1428	2	1	1	0	0	0	0.43
1429	2	1	1	1	0	0	19.93
1430	1	1	0	0	0	1	35.34
1431	2	0		2	0	1	0
1432	3	1	1	2	0	1	3.57
1433	0	0		2	0	1	39.54
